# Supplementary material for: A prospective case–cohort analysis of plasma metabolites and breast cancer risk
Source: PubMed Central journal article supplement (PMC9847033; doi:10.1186/s13058-023-01602-x), 2023-01-17
Supplement: 13058_2023_1602_MOESM1_ESM.pdf [file 13058_2023_1602_MOESM1_ESM.pdf]

**Supplemental Table S1.** Associations of all metabolites with breast cancer

| Metabolite                               | SUPER PATHWAY | SUBPATHWAY                                                   | RR (95% CI)†      | P        | FDR      | PLATFORM        | HMDB                      | PUBCHEM  | CHEM_ID   |
|------------------------------------------|---------------|--------------------------------------------------------------|-------------------|----------|----------|-----------------|---------------------------|----------|-----------|
| PC (18:2/18:2)                           | Lipid         | Phosphatidylcholine (PC)                                     | 0.85 (0.80, 0.92) | 1.19E-05 | 6.87E-03 | LC/MS Pos Late  | <a href="#">HMDB08138</a> | 5288075  | 100008903 |
| PC (18:2/18:3)*                          | Lipid         | Phosphatidylcholine (PC)                                     | 0.85 (0.79, 0.91) | 1.58E-05 | 6.87E-03 | LC/MS Pos Late  | <a href="#">HMDB08141</a> |          | 100009343 |
| Azelaate (C9-DC)                         | Lipid         | Fatty Acid, Dicarboxylate                                    | 0.87 (0.81, 0.93) | 1.17E-04 | 3.38E-02 | LC/MS Polar     | <a href="#">HMDB00784</a> | 2266     | 2029      |
| PC (O-16:0/18:2)*                        | Lipid         | Plasmalogen                                                  | 0.87 (0.82, 0.94) | 1.93E-04 | 3.42E-02 | LC/MS Pos Late  | <a href="#">HMDB11211</a> |          | 100009009 |
| LysoPE (18:1)                            | Lipid         | Lysophospholipid                                             | 0.87 (0.81, 0.94) | 2.23E-04 | 3.42E-02 | LC/MS Pos Late  | <a href="#">HMDB11506</a> | 9547071  | 100001569 |
| 2-Hydroxydecanoate                       | Lipid         | Fatty Acid, Monohydroxy                                      | 0.87 (0.81, 0.94) | 2.37E-04 | 3.42E-02 | LC/MS Neg       |                           | 21488    | 100004089 |
| LysoPC (18:2)                            | Lipid         | Lysophospholipid                                             | 0.87 (0.81, 0.94) | 2.81E-04 | 3.49E-02 | LC/MS Pos Late  | <a href="#">HMDB10386</a> | 11988421 | 100001395 |
| PC (O-16:0/18:1)*                        | Lipid         | Plasmalogen                                                  | 0.88 (0.82, 0.94) | 3.32E-04 | 3.60E-02 | LC/MS Pos Late  |                           |          | 100009007 |
| LysoPE (18:2)*                           | Lipid         | Lysophospholipid                                             | 0.88 (0.82, 0.94) | 4.60E-04 | 3.81E-02 | LC/MS Pos Late  | <a href="#">HMDB11507</a> | 52925130 | 100001570 |
| 3-Methyl catechol sulfate (2)            | Xenobiotics   | Benzoate Metabolism                                          | 1.14 (1.06, 1.23) | 4.76E-04 | 3.81E-02 | LC/MS Neg       |                           |          | 100004110 |
| LysoPC (18:3)*                           | Lipid         | Lysophospholipid                                             | 0.87 (0.81, 0.94) | 4.83E-04 | 3.81E-02 | LC/MS Pos Late  | <a href="#">HMDB10388</a> |          | 100005350 |
| Phenylacetylglutamine                    | Peptide       | Acetylated Peptides                                          | 0.88 (0.81, 0.95) | 1.11E-03 | 8.04E-02 | LC/MS Neg       | <a href="#">HMDB06344</a> | 92258    | 100001417 |
| PE (O-18:0/18:2)*                        | Lipid         | Plasmalogen                                                  | 0.89 (0.83, 0.96) | 1.41E-03 | 9.40E-02 | LC/MS Pos Late  | <a href="#">HMDB11376</a> |          | 100009225 |
| Serine                                   | Amino Acid    | Glycine, Serine and Threonine Metabolism                     | 0.89 (0.83, 0.96) | 1.74E-03 | 1.03E-01 | LC/MS Pos Early | <a href="#">HMDB00187</a> | 5951     | 503       |
| Androstenediol (3β,17β) disulfate (2)    | Lipid         | Androgenic Steroids                                          | 1.13 (1.05, 1.22) | 1.86E-03 | 1.03E-01 | LC/MS Neg       |                           |          | 100001994 |
| 2-Hydroxysebacate                        | Lipid         | Fatty Acid, Dicarboxylate                                    | 0.89 (0.83, 0.96) | 1.89E-03 | 1.03E-01 | LC/MS Neg       | <a href="#">HMDB00424</a> | 128458   | 100020378 |
| SM (d18:2/23:0, d18:1/23:1, d17:1/24:1)* | Lipid         | Sphingomyelins                                               | 0.89 (0.83, 0.96) | 2.31E-03 | 1.13E-01 | LC/MS Pos Late  |                           |          | 100008956 |
| PE (O-18:0/18:1)                         | Lipid         | Plasmalogen                                                  | 0.90 (0.83, 0.96) | 2.41E-03 | 1.13E-01 | LC/MS Pos Late  | <a href="#">HMDB11375</a> |          | 100008919 |
| Andro steroid monosulfate C19H28O6S (1)* | Lipid         | Androgenic Steroids                                          | 1.13 (1.04, 1.22) | 2.58E-03 | 1.13E-01 | LC/MS Neg       |                           |          | 100002152 |
| 12,13-DiHOME                             | Lipid         | Fatty Acid, Dihydroxy                                        | 0.89 (0.83, 0.96) | 2.61E-03 | 1.13E-01 | LC/MS Neg       | <a href="#">HMDB04705</a> | 10236635 | 62        |
| 21-Hydroxypregnenolone disulfate         | Lipid         | Pregnenolone Steroids                                        | 1.13 (1.04, 1.22) | 2.90E-03 | 1.14E-01 | LC/MS Neg       |                           | 134595   | 100001999 |
| LysoPC (18:1)                            | Lipid         | Lysophospholipid                                             | 0.90 (0.83, 0.96) | 3.01E-03 | 1.14E-01 | LC/MS Pos Late  | <a href="#">HMDB02815</a> | 16081932 | 100001272 |
| SM (d18:1/22:1, d18:2/22:0, d16:1/24:1)* | Lipid         | Sphingomyelins                                               | 0.90 (0.84, 0.96) | 3.03E-03 | 1.14E-01 | LC/MS Pos Late  | <a href="#">HMDB12104</a> |          | 100006295 |
| 3-Ethylcatechol sulfate (2)              | Xenobiotics   | Food Component/Plant                                         | 1.11 (1.04, 1.20) | 3.34E-03 | 1.14E-01 | LC/MS Neg       |                           |          | 100020852 |
| 3-Hydroxypyridine glucuronide            | Xenobiotics   | Chemical                                                     | 1.12 (1.04, 1.20) | 3.47E-03 | 1.14E-01 | LC/MS Pos Early |                           |          | 100020591 |
| Arachidoylcarnitine (C20)*               | Lipid         | Fatty Acid Metabolism (Acyl Carnitine, Long Chain Saturated) | 0.89 (0.82, 0.96) | 3.55E-03 | 1.14E-01 | LC/MS Pos Late  | <a href="#">HMDB06460</a> |          | 100015833 |
| S-Methylcysteine sulfoxide               | Amino Acid    | Methionine, Cysteine, SAM and Taurine Metabolism             | 0.89 (0.83, 0.96) | 3.56E-03 | 1.14E-01 | LC/MS Pos Early | <a href="#">HMDB29432</a> | 82142    | 100002927 |
| PC (18:0/18:2)*                          | Lipid         | Phosphatidylcholine (PC)                                     | 0.90 (0.84, 0.97) | 3.75E-03 | 1.15E-01 | LC/MS Pos Late  |                           |          | 100008980 |
| (2,4 or 2,5)-Dimethylphenol sulfate      | Xenobiotics   | Food Component/Plant                                         | 1.12 (1.04, 1.20) | 4.09E-03 | 1.15E-01 | LC/MS Neg       |                           |          | 100020519 |
| N-Formylanthranilic acid                 | Amino Acid    | Tryptophan Metabolism                                        | 0.89 (0.83, 0.96) | 4.09E-03 | 1.15E-01 | LC/MS Neg       | <a href="#">HMDB04089</a> | 101399   | 100004561 |
| Octadecadienedioate (C18:2-DC)*          | Lipid         | Fatty Acid, Dicarboxylate                                    | 0.89 (0.83, 0.96) | 4.13E-03 | 1.15E-01 | LC/MS Neg       |                           |          | 100019982 |

|                                          |                        |                                                         |                   |          |          |                 |                           |                    |
|------------------------------------------|------------------------|---------------------------------------------------------|-------------------|----------|----------|-----------------|---------------------------|--------------------|
| Syringol sulfate                         | Xenobiotics            | Food Component/Plant                                    | 1.12 (1.04, 1.21) | 4.23E-03 | 1.15E-01 | LC/MS Neg       |                           | 100006256          |
| Docosadioate (C22-DC)                    | Lipid                  | Fatty Acid, Dicarboxylate                               | 0.90 (0.83, 0.97) | 4.77E-03 | 1.24E-01 | LC/MS Neg       | 244872                    | 100002952          |
| PC (18:2/20:4n6)*                        | Lipid                  | Phosphatidylcholine (PC)                                | 0.90 (0.84, 0.97) | 5.02E-03 | 1.24E-01 | LC/MS Pos Late  | <a href="#">HMDB08147</a> | 100009131          |
| PE (O-16:0/18:1)*                        | Lipid                  | Plasmalogen                                             | 0.90 (0.84, 0.97) | 5.10E-03 | 1.24E-01 | LC/MS Pos Late  | <a href="#">HMDB11342</a> | 100009005          |
| PI (18:0/18:1)*                          | Lipid                  | Phosphatidylinositol (PI)                               | 0.90 (0.83, 0.97) | 5.25E-03 | 1.24E-01 | LC/MS Pos Late  |                           | 100009181          |
| LysoPC (24:0)                            | Lipid                  | Lysophospholipid                                        | 0.90 (0.83, 0.97) | 5.48E-03 | 1.24E-01 | LC/MS Pos Late  | <a href="#">HMDB10405</a> | 100002873          |
| Hippurate                                | Xenobiotics            | Benzoate Metabolism                                     | 0.90 (0.83, 0.97) | 5.86E-03 | 1.24E-01 | LC/MS Neg       | <a href="#">HMDB00714</a> | 464 100000014      |
| SM (d18:2/14:0, d18:1/14:1)*             | Lipid                  | Sphingomyelins                                          | 0.90 (0.84, 0.97) | 5.89E-03 | 1.24E-01 | LC/MS Pos Late  |                           | 100005985          |
| Androstenediol (3β,17β) disulfate (1)    | Lipid                  | Androgenic Steroids                                     | 1.11 (1.03, 1.20) | 5.99E-03 | 1.24E-01 | LC/MS Neg       | <a href="#">HMDB03818</a> | 87120982 100001992 |
| PE (18:2/18:2)*                          | Lipid                  | Phosphatidylethanolamine (PE)                           | 0.90 (0.84, 0.97) | 5.99E-03 | 1.24E-01 | LC/MS Pos Late  | <a href="#">HMDB09093</a> | 9546812 100009217  |
| Sphinganine-1-phosphate                  | Lipid                  | Sphingolipid Synthesis                                  | 0.91 (0.85, 0.97) | 6.07E-03 | 1.24E-01 | LC/MS Pos Late  | <a href="#">HMDB01383</a> | 520 100001876      |
| PI (18:0/18:2)                           | Lipid                  | Phosphatidylinositol (PI)                               | 0.90 (0.84, 0.97) | 6.18E-03 | 1.24E-01 | LC/MS Pos Late  | <a href="#">HMDB09809</a> | 100008994          |
| PE (O-16:0/18:2)*                        | Lipid                  | Plasmalogen                                             | 0.90 (0.84, 0.97) | 6.30E-03 | 1.24E-01 | LC/MS Pos Late  | <a href="#">HMDB11343</a> | 100009069          |
| Glycerophosphoethanolamine               | Lipid                  | Phospholipid Metabolism                                 | 0.91 (0.84, 0.97) | 7.09E-03 | 1.34E-01 | LC/MS Pos Early | <a href="#">HMDB00114</a> | 123874 100001620   |
| 16α-Hydroxy DHEA 3-sulfate               | Lipid                  | Androgenic Steroids                                     | 1.11 (1.03, 1.20) | 7.15E-03 | 1.34E-01 | LC/MS Neg       |                           | 100002126          |
| SM (d18:1/24:0)                          | Lipid                  | Sphingomyelins                                          | 0.91 (0.84, 0.97) | 7.25E-03 | 1.34E-01 | LC/MS Pos Late  |                           | 100006298          |
| Undecanedioate (C11-DC)                  | Lipid                  | Fatty Acid, Dicarboxylate                               | 0.91 (0.84, 0.97) | 8.01E-03 | 1.41E-01 | LC/MS Neg       | <a href="#">HMDB00888</a> | 15816 100001617    |
| Asparagine                               | Amino Acid             | Alanine and Aspartate Metabolism                        | 0.91 (0.84, 0.97) | 8.05E-03 | 1.41E-01 | LC/MS Pos Early | <a href="#">HMDB00168</a> | 6267 917           |
| Androstenediol (3α, 17α) monosulfate (2) | Lipid                  | Androgenic Steroids                                     | 1.11 (1.03, 1.20) | 8.15E-03 | 1.41E-01 | LC/MS Neg       |                           | 100002026          |
| Catechol glucuronide                     | Amino Acid             | Tyrosine Metabolism                                     | 1.10 (1.02, 1.19) | 8.85E-03 | 1.51E-01 | LC/MS Neg       |                           | 75124209 100009326 |
| Pregnenolone sulfate                     | Lipid                  | Pregnenolone Steroids                                   | 1.11 (1.03, 1.20) | 9.72E-03 | 1.60E-01 | LC/MS Neg       | <a href="#">HMDB00774</a> | 105074 100002129   |
| 4-Guanidinobutanoate                     | Amino Acid             | Guanidino and Acetamido Metabolism                      | 0.91 (0.85, 0.98) | 9.82E-03 | 1.60E-01 | LC/MS Pos Early | <a href="#">HMDB03464</a> | 500 100000096      |
| LysoPE (O-18:0)*                         | Lipid                  | Lysoplasmalogen                                         | 0.91 (0.84, 0.98) | 9.94E-03 | 1.60E-01 | LC/MS Pos Late  |                           | 100003001          |
| LysoPE (18:0)                            | Lipid                  | Lysophospholipid                                        | 0.91 (0.84, 0.98) | 1.05E-02 | 1.66E-01 | LC/MS Pos Late  | <a href="#">HMDB11130</a> | 9547068 100001461  |
| Androstenediol (3β,17β) monosulfate (1)  | Lipid                  | Androgenic Steroids                                     | 1.11 (1.02, 1.19) | 1.08E-02 | 1.67E-01 | LC/MS Neg       | <a href="#">HMDB03818</a> | 13847309 100002028 |
| Sphinganine                              | Lipid                  | Sphingolipid Synthesis                                  | 0.91 (0.85, 0.98) | 1.10E-02 | 1.67E-01 | LC/MS Pos Late  | <a href="#">HMDB00269</a> | 3126 313           |
| β-Cryptoxanthin                          | Cofactors and Vitamins | Vitamin A Metabolism                                    | 0.91 (0.84, 0.98) | 1.33E-02 | 1.94E-01 | LC/MS Pos Late  | <a href="#">HMDB33844</a> | 6384256 100001977  |
| PE (18:1/18:2)*                          | Lipid                  | Phosphatidylethanolamine (PE)                           | 0.91 (0.85, 0.98) | 1.34E-02 | 1.94E-01 | LC/MS Pos Late  | <a href="#">HMDB05349</a> | 9546753 100009078  |
| Dehydroepiandrosterone sulfate (DHEA-S)  | Lipid                  | Androgenic Steroids                                     | 1.11 (1.02, 1.20) | 1.35E-02 | 1.94E-01 | LC/MS Neg       | <a href="#">HMDB01032</a> | 12594 100000792    |
| Glutamine                                | Amino Acid             | Glutamate Metabolism                                    | 0.91 (0.85, 0.98) | 1.37E-02 | 1.94E-01 | LC/MS Pos Early | <a href="#">HMDB00641</a> | 5961 563           |
| Cytidine                                 | Nucleotide             | Pyrimidine Metabolism, Cytidine containing              | 1.10 (1.02, 1.19) | 1.44E-02 | 2.01E-01 | LC/MS Pos Early | <a href="#">HMDB00089</a> | 6175 827           |
| Linolenylcarnitine (C18:3)*              | Lipid                  | Fatty Acid Metabolism (Acyl Carnitine, Polyunsaturated) | 0.91 (0.84, 0.98) | 1.49E-02 | 2.06E-01 | LC/MS Pos Late  |                           | 100015831          |
| Glycine                                  | Amino Acid             | Glycine, Serine and Threonine Metabolism                | 0.91 (0.84, 0.98) | 1.59E-02 | 2.09E-01 | LC/MS Pos Early | <a href="#">HMDB00123</a> | 750 340            |

|                                                         |             |                                                              |                   |          |          |                 |                           |          |           |
|---------------------------------------------------------|-------------|--------------------------------------------------------------|-------------------|----------|----------|-----------------|---------------------------|----------|-----------|
| Androstenediol (3 $\beta$ ,17 $\beta$ ) monosulfate (2) | Lipid       | Androgenic Steroids                                          | 1.10 (1.02, 1.18) | 1.61E-02 | 2.09E-01 | LC/MS Neg       |                           |          | 100002029 |
| Stearoylcarnitine (C18)                                 | Lipid       | Fatty Acid Metabolism (Acyl Carnitine, Long Chain Saturated) | 0.91 (0.85, 0.98) | 1.62E-02 | 2.09E-01 | LC/MS Pos Late  | <a href="#">HMDB00848</a> | 6426855  | 100001391 |
| 3-Methyladipate                                         | Lipid       | Fatty Acid, Dicarboxylate                                    | 0.91 (0.84, 0.98) | 1.65E-02 | 2.09E-01 | LC/MS Polar     | <a href="#">HMDB00555</a> | 12292    | 100001765 |
| Pimelate (C7-DC)                                        | Lipid       | Fatty Acid, Dicarboxylate                                    | 0.91 (0.85, 0.98) | 1.65E-02 | 2.09E-01 | LC/MS Polar     | <a href="#">HMDB00857</a> | 385      | 100000101 |
| p-Cresol sulfate                                        | Xenobiotics | Benzoate Metabolism                                          | 0.91 (0.85, 0.98) | 1.66E-02 | 2.09E-01 | LC/MS Neg       | <a href="#">HMDB11635</a> | 4615423  | 100001315 |
| N-Acetylhistidine                                       | Amino Acid  | Histidine Metabolism                                         | 0.91 (0.85, 0.98) | 1.70E-02 | 2.10E-01 | LC/MS Neg       | <a href="#">HMDB32055</a> | 75619    | 100001293 |
| Phenylacetylglutamate                                   | Peptide     | Acetylated Peptides                                          | 0.91 (0.84, 0.98) | 1.72E-02 | 2.10E-01 | LC/MS Neg       | <a href="#">HMDB59772</a> | 11579826 | 100009045 |
| Levulinoylcarnitine                                     | Xenobiotics | Food Component/Plant                                         | 0.91 (0.85, 0.98) | 1.74E-02 | 2.10E-01 | LC/MS Pos Early |                           |          | 100021140 |
| $\gamma$ -Glutamylvaline                                | Peptide     | Gamma-glutamyl Amino Acid                                    | 1.10 (1.02, 1.18) | 1.82E-02 | 2.17E-01 | LC/MS Pos Early | <a href="#">HMDB11172</a> | 7015683  | 100001126 |
| SM (d18:1/16:0)                                         | Lipid       | Sphingomyelins                                               | 0.92 (0.86, 0.99) | 1.91E-02 | 2.22E-01 | LC/MS Pos Late  |                           | 9939941  | 100002107 |
| LysoPI (18:1)                                           | Lipid       | Lysophospholipid                                             | 0.92 (0.85, 0.99) | 1.92E-02 | 2.22E-01 | LC/MS Neg       |                           |          | 100001777 |
| SM (d18:2/16:0, d18:1/16:1)*                            | Lipid       | Sphingomyelins                                               | 0.92 (0.85, 0.99) | 2.00E-02 | 2.23E-01 | LC/MS Pos Late  |                           |          | 100004329 |
| Campesterol                                             | Lipid       | Sterol                                                       | 0.92 (0.85, 0.99) | 2.02E-02 | 2.23E-01 | LC/MS Pos Late  | <a href="#">HMDB02869</a> | 173183   | 100001269 |
| Cortolone glucuronide (1)                               | Lipid       | Corticosteroids                                              | 1.10 (1.01, 1.18) | 2.08E-02 | 2.23E-01 | LC/MS Neg       |                           |          | 100015971 |
| PC (16:0/18:2)                                          | Lipid       | Phosphatidylcholine (PC)                                     | 0.92 (0.86, 0.99) | 2.11E-02 | 2.23E-01 | LC/MS Pos Late  | <a href="#">HMDB07973</a> | 5287971  | 1537      |
| LysoPC (18:0)                                           | Lipid       | Lysophospholipid                                             | 0.92 (0.85, 0.99) | 2.11E-02 | 2.23E-01 | LC/MS Pos Late  | <a href="#">HMDB10384</a> | 497299   | 100001271 |
| 2-Ketocaprylate                                         | Amino Acid  | Leucine, Isoleucine and Valine Metabolism                    | 0.91 (0.85, 0.99) | 2.13E-02 | 2.23E-01 | LC/MS Polar     | <a href="#">HMDB13211</a> | 67600    | 100020833 |
| $\gamma$ -Glutamylglutamine                             | Peptide     | Gamma-glutamyl Amino Acid                                    | 0.92 (0.85, 0.99) | 2.18E-02 | 2.23E-01 | LC/MS Pos Early | <a href="#">HMDB11738</a> | 150914   | 1140      |
| 2-LysoPE (18:0)*                                        | Lipid       | Lysophospholipid                                             | 0.92 (0.85, 0.99) | 2.19E-02 | 2.23E-01 | LC/MS Neg       | <a href="#">HMDB11129</a> |          | 100003901 |
| o-Cresol sulfate                                        | Xenobiotics | Benzoate Metabolism                                          | 1.09 (1.01, 1.18) | 2.19E-02 | 2.23E-01 | LC/MS Neg       |                           | 11615528 | 100001806 |
| LysoPE (20:4n6)*                                        | Lipid       | Lysophospholipid                                             | 0.92 (0.85, 0.99) | 2.20E-02 | 2.23E-01 | LC/MS Pos Late  | <a href="#">HMDB11517</a> | 42607465 | 100001571 |
| p-Cresol glucuronide*                                   | Amino Acid  | Tyrosine Metabolism                                          | 0.92 (0.85, 0.99) | 2.21E-02 | 2.23E-01 | LC/MS Neg       | <a href="#">HMDB11686</a> | 154035   | 100006191 |
| 4-Hydroxychlorothalonil                                 | Xenobiotics | Chemical                                                     | 0.91 (0.84, 0.99) | 2.29E-02 | 2.28E-01 | LC/MS Neg       |                           | 34217    | 100006082 |
| Glycerophosphorylcholine (GPC)                          | Lipid       | Phospholipid Metabolism                                      | 0.92 (0.85, 0.99) | 2.31E-02 | 2.28E-01 | LC/MS Pos Early | <a href="#">HMDB00086</a> | 71920    | 100000269 |
| Ethyl $\alpha$ -glucopyranoside                         | Xenobiotics | Food Component/Plant                                         | 0.92 (0.85, 0.99) | 2.50E-02 | 2.44E-01 | LC/MS Pos Early |                           | 428040   | 100015965 |
| SM (d18:1/24:1, d18:2/24:0)*                            | Lipid       | Sphingomyelins                                               | 0.92 (0.86, 0.99) | 2.53E-02 | 2.44E-01 | LC/MS Pos Late  | <a href="#">HMDB12107</a> |          | 100005986 |
| SM (d17:1/14:0, d16:1/15:0)*                            | Lipid       | Sphingomyelins                                               | 0.92 (0.85, 0.99) | 2.65E-02 | 2.51E-01 | LC/MS Pos Late  |                           |          | 100020276 |
| SM (d18:2/24:1, d18:1/24:2)*                            | Lipid       | Sphingomyelins                                               | 0.92 (0.86, 0.99) | 2.66E-02 | 2.51E-01 | LC/MS Pos Late  |                           |          | 100008957 |
| 4-Acetylcatechol sulfate (2)                            | Xenobiotics | Food Component/Plant                                         | 1.08 (1.01, 1.16) | 2.82E-02 | 2.63E-01 | LC/MS Neg       |                           |          | 100020854 |
| Tryptophan betaine                                      | Amino Acid  | Tryptophan Metabolism                                        | 0.92 (0.86, 0.99) | 2.95E-02 | 2.67E-01 | LC/MS Pos Early | <a href="#">HMDB61115</a> | 442106   | 100001743 |
| $\gamma$ -Glutamylglycine                               | Peptide     | Gamma-glutamyl Amino Acid                                    | 0.92 (0.85, 0.99) | 2.96E-02 | 2.67E-01 | LC/MS Pos Early | <a href="#">HMDB11667</a> | 165527   | 100001294 |
| Valylglycine                                            | Peptide     | Dipeptide                                                    | 0.92 (0.85, 0.99) | 3.00E-02 | 2.67E-01 | LC/MS Neg       | <a href="#">HMDB29127</a> | 136487   | 100003641 |
| Branched chain 14:0 dicarboxylic acid**                 | Lipid       | Fatty Acid, Dicarboxylate                                    | 0.92 (0.85, 0.99) | 3.02E-02 | 2.67E-01 | LC/MS Neg       |                           |          | 100021374 |
| 11 $\beta$ -Hydroxyandrostosterone glucuronide          | Lipid       | Androgenic Steroids                                          | 1.09 (1.01, 1.18) | 3.03E-02 | 2.67E-01 | LC/MS Neg       |                           |          | 100020541 |

|                                                             |              |                                                         |                   |          |          |                 |                           |                    |
|-------------------------------------------------------------|--------------|---------------------------------------------------------|-------------------|----------|----------|-----------------|---------------------------|--------------------|
| SM (d17:2/16:0, d18:2/15:0)*                                | Lipid        | Sphingomyelins                                          | 0.92 (0.85, 0.99) | 3.07E-02 | 2.67E-01 | LC/MS Pos Late  |                           | 100015793          |
| SM (d18:1/23:0)*                                            | Lipid        | Sphingomyelins                                          | 0.92 (0.85, 0.99) | 3.10E-02 | 2.67E-01 | LC/MS Pos Late  | <a href="#">HMDB12105</a> | 100008955          |
| SM (d18:1/21:0, d17:1/22:0, d16:1/23:0)*                    | Lipid        | Sphingomyelins                                          | 0.92 (0.85, 0.99) | 3.14E-02 | 2.67E-01 | LC/MS Pos Late  |                           | 100009025          |
| Pregnenediol disulfate (C21H34O8S2)*                        | Lipid        | Pregnenolone Steroids                                   | 1.09 (1.01, 1.18) | 3.15E-02 | 2.67E-01 | LC/MS Neg       |                           | 100001993          |
| Dodecenedioate (C12:1-DC)*                                  | Lipid        | Fatty Acid, Dicarboxylate                               | 0.92 (0.86, 0.99) | 3.19E-02 | 2.67E-01 | LC/MS Neg       |                           | 100019972          |
| N-Acetylaspartate (NAA)                                     | Amino Acid   | Alanine and Aspartate Metabolism                        | 0.93 (0.86, 0.99) | 3.19E-02 | 2.67E-01 | LC/MS Neg       | <a href="#">HMDB00812</a> | 65065 100000787    |
| Adipoylcarnitine (C6-DC)                                    | Lipid        | Fatty Acid Metabolism (Acyl Carnitine, Dicarboxylate)   | 1.09 (1.01, 1.17) | 3.26E-02 | 2.69E-01 | LC/MS Pos Early | <a href="#">HMDB61677</a> | 71296139 100006614 |
| 13-HODE + 9-HODE                                            | Lipid        | Fatty Acid, Monohydroxy                                 | 0.93 (0.86, 0.99) | 3.34E-02 | 2.74E-01 | LC/MS Neg       |                           | 100002196          |
| 2-Butenoylglycine                                           | Lipid        | Fatty Acid Metabolism (Acyl Glycine)                    | 0.92 (0.86, 0.99) | 3.44E-02 | 2.77E-01 | LC/MS Neg       |                           | 6303498 100016110  |
| Ribulonate/xylulonate/lyxonate*                             | Carbohydrate | Pentose Metabolism                                      | 0.92 (0.86, 0.99) | 3.50E-02 | 2.77E-01 | LC/MS Polar     |                           | 100019968          |
| 4-Acetylcatechol sulfate (1)                                | Xenobiotics  | Food Component/Plant                                    | 1.08 (1.01, 1.16) | 3.52E-02 | 2.77E-01 | LC/MS Neg       |                           | 100020853          |
| SM (d18:2/24:2)*                                            | Lipid        | Sphingomyelins                                          | 0.92 (0.86, 0.99) | 3.55E-02 | 2.77E-01 | LC/MS Pos Late  |                           | 100015789          |
| Suberate (C8-DC)                                            | Lipid        | Fatty Acid, Dicarboxylate                               | 0.93 (0.86, 0.99) | 3.60E-02 | 2.77E-01 | LC/MS Polar     | <a href="#">HMDB00893</a> | 10457 100000016    |
| Choline phosphate                                           | Lipid        | Phospholipid Metabolism                                 | 0.93 (0.87, 1.00) | 3.60E-02 | 2.77E-01 | LC/MS Polar     | <a href="#">HMDB01565</a> | 1014 267           |
| 2-Hydroxybehenate                                           | Lipid        | Fatty Acid, Monohydroxy                                 | 0.93 (0.86, 1.00) | 3.61E-02 | 2.77E-01 | LC/MS Neg       |                           | 193484 100015637   |
| PC (16:0/18:0)                                              | Lipid        | Phosphatidylcholine (PC)                                | 0.93 (0.86, 1.00) | 3.68E-02 | 2.78E-01 | LC/MS Pos Late  | <a href="#">HMDB07970</a> | 100008921          |
| Linoleoylcarnitine (C18:2)*                                 | Lipid        | Fatty Acid Metabolism (Acyl Carnitine, Polyunsaturated) | 0.92 (0.85, 0.99) | 3.68E-02 | 2.78E-01 | LC/MS Pos Late  | <a href="#">HMDB06469</a> | 6450015 100003151  |
| SM (d18:2/21:0, d16:2/23:0)*                                | Lipid        | Sphingomyelins                                          | 0.92 (0.86, 1.00) | 3.76E-02 | 2.82E-01 | LC/MS Pos Late  |                           | 100015790          |
| 1,7-Dimethylurate                                           | Xenobiotics  | Xanthine Metabolism                                     | 0.92 (0.86, 1.00) | 3.90E-02 | 2.89E-01 | LC/MS Neg       | <a href="#">HMDB11103</a> | 91611 100001399    |
| LysoPE (O-16:0)*                                            | Lipid        | Lysoplasmalogen                                         | 0.93 (0.86, 1.00) | 4.04E-02 | 2.96E-01 | LC/MS Pos Late  |                           | 100003000          |
| PC (O-16:0/16:0)*                                           | Lipid        | Plasmalogen                                             | 0.93 (0.86, 1.00) | 4.07E-02 | 2.96E-01 | LC/MS Pos Late  | <a href="#">HMDB11206</a> | 11146967 100009162 |
| N-Acetylglycine                                             | Amino Acid   | Glycine, Serine and Threonine Metabolism                | 0.93 (0.86, 1.00) | 4.09E-02 | 2.96E-01 | LC/MS Pos Early | <a href="#">HMDB00532</a> | 10972 100001006    |
| N-Acetylglutamate                                           | Amino Acid   | Glutamate Metabolism                                    | 0.92 (0.86, 1.00) | 4.15E-02 | 2.97E-01 | LC/MS Pos Early | <a href="#">HMDB01138</a> | 70914 100000282    |
| Histidine                                                   | Amino Acid   | Histidine Metabolism                                    | 0.93 (0.86, 1.00) | 4.25E-02 | 2.99E-01 | LC/MS Neg       | <a href="#">HMDB00177</a> | 6274 355           |
| Glycosyl ceramide (d18:2/22:0)*                             | Lipid        | Hexosylceramides (HCER)                                 | 0.93 (0.86, 1.00) | 4.28E-02 | 2.99E-01 | LC/MS Pos Late  |                           | 100015625          |
| Cortisone                                                   | Lipid        | Corticosteroids                                         | 1.08 (1.00, 1.17) | 4.29E-02 | 2.99E-01 | LC/MS Neg       | <a href="#">HMDB02802</a> | 222786 273         |
| LysoPG (18:1)*                                              | Lipid        | Lysophospholipid                                        | 0.93 (0.86, 1.00) | 4.34E-02 | 2.99E-01 | LC/MS Neg       |                           | 100005716          |
| 5 $\alpha$ -Androstan-3 $\beta$ ,17 $\beta$ -diol disulfate | Lipid        | Androgenic Steroids                                     | 1.08 (1.00, 1.16) | 4.35E-02 | 2.99E-01 | LC/MS Neg       | <a href="#">HMDB00493</a> | 242332 100001987   |
| Glycosyl ceramide (d18:2/24:1, d18:1/24:2)*                 | Lipid        | Hexosylceramides (HCER)                                 | 0.93 (0.86, 1.00) | 4.41E-02 | 2.99E-01 | LC/MS Pos Late  |                           | 100015745          |
| SM (d18:1/22:0)*                                            | Lipid        | Sphingomyelins                                          | 0.93 (0.86, 1.00) | 4.42E-02 | 2.99E-01 | LC/MS Pos Late  | <a href="#">HMDB12103</a> | 100006294          |
| DihydroSM (d18:0/16:0)*                                     | Lipid        | Dihydrosphingomyelins                                   | 0.93 (0.86, 1.00) | 4.57E-02 | 3.05E-01 | LC/MS Pos Late  |                           | 9939965 100008954  |
| PE (O-18:0/20:4)*                                           | Lipid        | Plasmalogen                                             | 0.93 (0.86, 1.00) | 4.59E-02 | 3.05E-01 | LC/MS Pos Late  | <a href="#">HMDB05779</a> | 9547058 100008999  |
| Glycolithocholate                                           | Lipid        | Secondary Bile Acid Metabolism                          | 0.93 (0.86, 1.00) | 4.60E-02 | 3.05E-01 | LC/MS Neg       | <a href="#">HMDB00698</a> | 115245 100001064   |
| 3-Hydroxy-2-methylpyridine sulfate                          | Xenobiotics  | Chemical                                                | 1.08 (1.00, 1.16) | 4.77E-02 | 3.12E-01 | LC/MS Neg       |                           | 100020975          |

|                                          |             |                                                  |                   |          |          |                 |                           |               |           |
|------------------------------------------|-------------|--------------------------------------------------|-------------------|----------|----------|-----------------|---------------------------|---------------|-----------|
| 3β-Hydroxy-5-cholenoic acid              | Lipid       | Secondary Bile Acid Metabolism                   | 0.93 (0.86, 1.00) | 4.78E-02 | 3.12E-01 | LC/MS Neg       | <a href="#">HMDB00308</a> | 92997         | 100004182 |
| DihydroSM (d18:0/18:0, d19:0/17:0)*      | Lipid       | Dihydrosphingomyelins                            | 1.08 (1.00, 1.17) | 4.83E-02 | 3.13E-01 | LC/MS Pos Late  | <a href="#">HMDB12087</a> |               | 100009027 |
| 3-Methoxycatechol sulfate (1)            | Xenobiotics | Benzoate Metabolism                              | 1.08 (1.00, 1.16) | 4.96E-02 | 3.18E-01 | LC/MS Neg       |                           |               | 100006375 |
| Arachidate (20:0)                        | Lipid       | Long Chain Saturated Fatty Acid                  | 0.93 (0.86, 1.00) | 4.98E-02 | 3.18E-01 | LC/MS Neg       | <a href="#">HMDB02212</a> | 10467         | 893       |
| Hypotaurine                              | Amino Acid  | Methionine, Cysteine, SAM and Taurine Metabolism | 0.93 (0.87, 1.00) | 5.01E-02 | 3.18E-01 | LC/MS Polar     | <a href="#">HMDB00965</a> | 107812        | 358       |
| SM (d18:1/14:0, d16:1/16:0)*             | Lipid       | Sphingomyelins                                   | 0.93 (0.86, 1.00) | 5.10E-02 | 3.21E-01 | LC/MS Pos Late  | <a href="#">HMDB12097</a> | 11433862      | 100004328 |
| 5α-Pregnan-diol disulfate                | Lipid       | Progesterin Steroids                             | 1.09 (1.00, 1.18) | 5.32E-02 | 3.30E-01 | LC/MS Neg       |                           | 5127902       | 100002015 |
| Glycodeoxycholate                        | Lipid       | Secondary Bile Acid Metabolism                   | 0.93 (0.86, 1.00) | 5.34E-02 | 3.30E-01 | LC/MS Neg       | <a href="#">HMDB00631</a> | 3035026       | 100000436 |
| LysoPA (18:2)*                           | Lipid       | Lysophospholipid                                 | 0.93 (0.86, 1.00) | 5.36E-02 | 3.30E-01 | LC/MS Neg       | <a href="#">HMDB07856</a> |               | 100009082 |
| 2-Methoxyacetaminophen glucuronide*      | Xenobiotics | Drug - Analgesics, Anesthetics                   | 0.93 (0.86, 1.00) | 5.51E-02 | 3.36E-01 | LC/MS Neg       |                           | 14367271      | 100001795 |
| LysoPE (16:0)                            | Lipid       | Lysophospholipid                                 | 0.93 (0.86, 1.00) | 5.57E-02 | 3.36E-01 | LC/MS Pos Late  | <a href="#">HMDB11503</a> | 9547069       | 100001567 |
| 3-Hydroxybutyryl glycine**               | Lipid       | Fatty Acid Metabolism (Acyl Glycine)             | 0.93 (0.86, 1.00) | 5.58E-02 | 3.36E-01 | LC/MS Pos Early |                           |               | 100020211 |
| Gluconate                                | Xenobiotics | Food Component/Plant                             | 0.93 (0.86, 1.00) | 5.62E-02 | 3.37E-01 | LC/MS Polar     | <a href="#">HMDB00625</a> | 10690         | 338       |
| Hydroquinone β-D-glucopyranoside         | Xenobiotics | Food Component/Plant                             | 1.07 (1.00, 1.16) | 5.72E-02 | 3.40E-01 | LC/MS Neg       | <a href="#">HMDB29943</a> | 346           | 100002220 |
| Ergothioneine                            | Xenobiotics | Food Component/Plant                             | 0.93 (0.86, 1.00) | 5.78E-02 | 3.41E-01 | LC/MS Pos Early | <a href="#">HMDB03045</a> | 3032311       | 100002154 |
| 3-Hydroxytridecanoate                    | Lipid       | Fatty Acid, Monohydroxy                          | 0.93 (0.85, 1.00) | 5.87E-02 | 3.44E-01 | LC/MS Neg       | <a href="#">HMDB61655</a> | 5312749       | 100021388 |
| N-(2-Furoyl)glycine                      | Xenobiotics | Food Component/Plant                             | 1.07 (1.00, 1.15) | 5.90E-02 | 3.44E-01 | LC/MS Neg       | <a href="#">HMDB00439</a> | 21863         | 100001086 |
| Guanidinoacetate                         | Amino Acid  | Creatine Metabolism                              | 0.93 (0.86, 1.00) | 6.16E-02 | 3.56E-01 | LC/MS Polar     | <a href="#">HMDB00128</a> | 763           | 344       |
| Taurine                                  | Amino Acid  | Methionine, Cysteine, SAM and Taurine Metabolism | 0.93 (0.87, 1.00) | 6.19E-02 | 3.56E-01 | LC/MS Pos Early | <a href="#">HMDB00251</a> | 1123          | 512       |
| Hydrochlorothiazide                      | Xenobiotics | Drug - Cardiovascular                            | 1.07 (1.00, 1.15) | 6.39E-02 | 3.64E-01 | LC/MS Neg       | <a href="#">HMDB01928</a> | 3639          | 100002734 |
| Androstenediol (3α, 17α) monosulfate (3) | Lipid       | Androgenic Steroids                              | 1.08 (1.00, 1.17) | 6.42E-02 | 3.64E-01 | LC/MS Neg       |                           |               | 100002027 |
| 2-Methoxyresorcinol sulfate              | Xenobiotics | Chemical                                         | 1.07 (1.00, 1.15) | 6.50E-02 | 3.66E-01 | LC/MS Neg       |                           |               | 100006184 |
| 3-Methoxytyramine sulfate                | Amino Acid  | Tyrosine Metabolism                              | 0.93 (0.86, 1.00) | 6.64E-02 | 3.66E-01 | LC/MS Neg       |                           |               | 100004634 |
| Pregnenediol sulfate (C21H34O5S)*        | Lipid       | Pregnenolone Steroids                            | 1.08 (0.99, 1.17) | 6.65E-02 | 3.66E-01 | LC/MS Neg       |                           |               | 100002067 |
| 6-Hydroxyindole sulfate                  | Xenobiotics | Chemical                                         | 0.93 (0.86, 1.00) | 6.69E-02 | 3.66E-01 | LC/MS Neg       |                           | 12219819<br>6 | 100006260 |
| PC (P-16:0/16:1)*                        | Lipid       | Plasmalogen                                      | 0.94 (0.87, 1.00) | 6.71E-02 | 3.66E-01 | LC/MS Pos Late  | <a href="#">HMDB11207</a> |               | 100009160 |
| PC (18:0/18:1)                           | Lipid       | Phosphatidylcholine (PC)                         | 0.93 (0.86, 1.01) | 6.77E-02 | 3.66E-01 | LC/MS Pos Late  | <a href="#">HMDB08038</a> |               | 100008904 |
| 3-Indoxyl sulfate                        | Amino Acid  | Tryptophan Metabolism                            | 0.93 (0.87, 1.01) | 6.84E-02 | 3.66E-01 | LC/MS Neg       | <a href="#">HMDB00682</a> | 10258         | 100000467 |
| S-Methylcysteine                         | Amino Acid  | Methionine, Cysteine, SAM and Taurine Metabolism | 0.93 (0.86, 1.01) | 6.85E-02 | 3.66E-01 | LC/MS Neg       | <a href="#">HMDB02108</a> | 24417         | 100002749 |
| PE (18:0/18:1)                           | Lipid       | Phosphatidylethanolamine (PE)                    | 0.94 (0.87, 1.01) | 6.91E-02 | 3.66E-01 | LC/MS Pos Late  | <a href="#">HMDB08993</a> |               | 100001856 |
| N-Oleoyltaurine                          | Lipid       | Endocannabinoid                                  | 0.93 (0.87, 1.01) | 6.92E-02 | 3.66E-01 | LC/MS Neg       |                           | 6437033       | 100003119 |
| Urea                                     | Amino Acid  | Urea cycle; Arginine and Proline Metabolism      | 0.93 (0.86, 1.01) | 6.93E-02 | 3.66E-01 | LC/MS Pos Early | <a href="#">HMDB00294</a> | 1176          | 533       |
| 4-Hydroxyglutamate                       | Amino Acid  | Glutamate Metabolism                             | 1.07 (0.99, 1.16) | 6.95E-02 | 3.66E-01 | LC/MS Pos Early | <a href="#">HMDB01344</a> | 439902        | 100002544 |

|                                                                 |             |                                                   |                   |          |          |                 |                           |          |           |
|-----------------------------------------------------------------|-------------|---------------------------------------------------|-------------------|----------|----------|-----------------|---------------------------|----------|-----------|
| Indolin-2-one                                                   | Xenobiotics | Food Component/Plant                              | 0.94 (0.87, 1.01) | 7.00E-02 | 3.66E-01 | LC/MS Pos Early |                           | 321710   | 100004318 |
| LysoPG (18:2)*                                                  | Lipid       | Lysophospholipid                                  | 0.93 (0.87, 1.01) | 7.13E-02 | 3.70E-01 | LC/MS Neg       |                           |          | 100009227 |
| N-Palmitoyl-sphinganine (d18:0/16:0)                            | Lipid       | Dihydroceramides                                  | 0.93 (0.87, 1.01) | 7.17E-02 | 3.70E-01 | LC/MS Pos Late  | <a href="#">HMDB11760</a> | 5283572  | 100009028 |
| 1-Methylxanthine                                                | Xenobiotics | Xanthine Metabolism                               | 0.93 (0.86, 1.01) | 7.26E-02 | 3.73E-01 | LC/MS Neg       | <a href="#">HMDB10738</a> | 80220    | 100001405 |
| 5 $\alpha$ -Androstan-3 $\alpha$ ,17 $\alpha$ -diol monosulfate | Lipid       | Androgenic Steroids                               | 1.07 (0.99, 1.15) | 7.56E-02 | 3.85E-01 | LC/MS Neg       |                           |          | 100002008 |
| PE (0-16:0/20:4)*                                               | Lipid       | Plasmalogen                                       | 0.94 (0.87, 1.01) | 7.59E-02 | 3.85E-01 | LC/MS Pos Late  | <a href="#">HMDB11352</a> |          | 100009002 |
| PE (18:1/20:4)*                                                 | Lipid       | Phosphatidylethanolamine (PE)                     | 0.94 (0.87, 1.01) | 7.67E-02 | 3.85E-01 | LC/MS Pos Late  | <a href="#">HMDB09069</a> |          | 100009219 |
| 3-Formylindole                                                  | Xenobiotics | Food Component/Plant                              | 1.07 (0.99, 1.16) | 7.68E-02 | 3.85E-01 | LC/MS Polar     | <a href="#">HMDB29737</a> | 10256    | 100020219 |
| Cholesterol                                                     | Lipid       | Sterol                                            | 0.93 (0.87, 1.01) | 7.75E-02 | 3.87E-01 | LC/MS Pos Late  | <a href="#">HMDB00067</a> | 11025495 | 266       |
| 2-Methoxyacetaminophen sulfate*                                 | Xenobiotics | Drug - Analgesics, Anesthetics                    | 0.94 (0.87, 1.01) | 7.95E-02 | 3.92E-01 | LC/MS Neg       |                           | 86290014 | 100001793 |
| Maleate                                                         | Lipid       | Fatty Acid, Dicarboxylate                         | 1.07 (0.99, 1.15) | 7.96E-02 | 3.92E-01 | LC/MS Polar     | <a href="#">HMDB00176</a> | 444266   | 100000707 |
| Citrulline                                                      | Amino Acid  | Urea cycle; Arginine and Proline Metabolism       | 0.93 (0.86, 1.01) | 8.03E-02 | 3.94E-01 | LC/MS Pos Early | <a href="#">HMDB00904</a> | 9750     | 391       |
| 3-Carboxy-4-methyl-5-pentyl-2-furanpropionate (3-CMPFP)**       | Lipid       | Fatty Acid, Dicarboxylate                         | 0.93 (0.87, 1.01) | 8.09E-02 | 3.95E-01 | LC/MS Neg       |                           | 194501   | 100020004 |
| N,N-Dimethyl-5-aminovalerate                                    | Amino Acid  | Lysine Metabolism                                 | 0.94 (0.87, 1.01) | 8.21E-02 | 3.98E-01 | LC/MS Pos Early |                           |          | 100020842 |
| Ethyl $\beta$ -glucopyranoside                                  | Xenobiotics | Food Component/Plant                              | 0.93 (0.86, 1.01) | 8.28E-02 | 3.99E-01 | LC/MS Neg       |                           | 121667   | 100020377 |
| Cinnamoylglycine                                                | Xenobiotics | Food Component/Plant                              | 0.94 (0.87, 1.01) | 8.32E-02 | 3.99E-01 | LC/MS Neg       | <a href="#">HMDB11621</a> | 709625   | 100002253 |
| 2,3-Dihydroxypyridine                                           | Xenobiotics | Food Component/Plant                              | 1.07 (0.99, 1.15) | 8.41E-02 | 3.99E-01 | LC/MS Pos Early |                           | 28115    | 100000861 |
| Threonine                                                       | Amino Acid  | Glycine, Serine and Threonine Metabolism          | 0.94 (0.87, 1.01) | 8.41E-02 | 3.99E-01 | LC/MS Pos Early | <a href="#">HMDB00167</a> | 6288     | 564       |
| Octadecenedioate (C18:1-DC)                                     | Lipid       | Fatty Acid, Dicarboxylate                         | 0.94 (0.87, 1.01) | 8.65E-02 | 4.06E-01 | LC/MS Neg       |                           |          | 100019978 |
| S-Methylmethionine                                              | Amino Acid  | Methionine, Cysteine, SAM and Taurine Metabolism  | 0.94 (0.87, 1.01) | 8.66E-02 | 4.06E-01 | LC/MS Pos Early | <a href="#">HMDB38670</a> | 458      | 100002183 |
| Theanine                                                        | Xenobiotics | Food Component/Plant                              | 1.07 (0.99, 1.15) | 8.81E-02 | 4.11E-01 | LC/MS Neg       | <a href="#">HMDB34365</a> | 439378   | 100000784 |
| 2-Hydroxyarachidate*                                            | Lipid       | Fatty Acid, Monohydroxy                           | 0.94 (0.88, 1.01) | 8.96E-02 | 4.16E-01 | LC/MS Neg       |                           | 5225199  | 100019892 |
| Ibuprofen                                                       | Xenobiotics | Drug - Analgesics, Anesthetics                    | 0.94 (0.88, 1.01) | 9.07E-02 | 4.19E-01 | LC/MS Neg       | <a href="#">HMDB01925</a> | 3672     | 1487      |
| 2-Aminoadipate                                                  | Amino Acid  | Lysine Metabolism                                 | 1.07 (0.99, 1.15) | 9.11E-02 | 4.19E-01 | LC/MS Polar     | <a href="#">HMDB00510</a> | 469      | 381       |
| 9,10-DiHOME                                                     | Lipid       | Fatty Acid, Dihydroxy                             | 0.94 (0.87, 1.01) | 9.26E-02 | 4.22E-01 | LC/MS Neg       | <a href="#">HMDB04704</a> | 9966640  | 179       |
| LysoPE (O-18:1)*                                                | Lipid       | Lysoplasmalogen                                   | 0.94 (0.87, 1.01) | 9.34E-02 | 4.22E-01 | LC/MS Pos Late  |                           |          | 100005372 |
| Sphingosine 1-phosphate                                         | Lipid       | Sphingosines                                      | 0.94 (0.88, 1.01) | 9.34E-02 | 4.22E-01 | LC/MS Pos Late  | <a href="#">HMDB00277</a> | 5283560  | 100000626 |
| Citraconate/glutaconate                                         | Energy      | TCA Cycle                                         | 1.07 (0.99, 1.15) | 9.55E-02 | 4.23E-01 | LC/MS Polar     |                           |          | 100006438 |
| Pregnenetriol disulfate*                                        | Lipid       | Pregnenolone Steroids                             | 1.07 (0.99, 1.15) | 9.59E-02 | 4.23E-01 | LC/MS Neg       |                           |          | 100021104 |
| Linolenate [ $\alpha$ or $\gamma$ ; (18:3n3 or 6)]              | Lipid       | Long Chain Polyunsaturated Fatty Acid (n3 and n6) | 0.94 (0.87, 1.01) | 9.59E-02 | 4.23E-01 | LC/MS Neg       | <a href="#">HMDB03073</a> | 5280934  | 100001337 |
| Hydroxy-CMPF*                                                   | Lipid       | Fatty Acid, Dicarboxylate                         | 0.94 (0.87, 1.01) | 9.66E-02 | 4.23E-01 | LC/MS Neg       |                           |          | 100019794 |
| N-Palmitoyl-sphingosine (d18:1/16:0)                            | Lipid       | Ceramides                                         | 0.94 (0.87, 1.01) | 9.67E-02 | 4.23E-01 | LC/MS Pos Late  | <a href="#">HMDB04949</a> | 5283564  | 1518      |
| Glycolithocholate sulfate*                                      | Lipid       | Secondary Bile Acid Metabolism                    | 0.94 (0.87, 1.01) | 9.70E-02 | 4.23E-01 | LC/MS Neg       | <a href="#">HMDB02639</a> | 72222    | 100001657 |
| Oleoyl ethanolamide                                             | Lipid       | Endocannabinoid                                   | 0.94 (0.87, 1.01) | 9.74E-02 | 4.23E-01 | LC/MS Neg       | <a href="#">HMDB02088</a> | 5283454  | 1137      |

|                                           |                        |                                                         |                   |          |          |                 |                           |          |           |
|-------------------------------------------|------------------------|---------------------------------------------------------|-------------------|----------|----------|-----------------|---------------------------|----------|-----------|
| Nonanoylcarnitine (C9)                    | Lipid                  | Fatty Acid Metabolism (Acyl Carnitine, Medium Chain)    | 1.06 (0.99, 1.14) | 9.79E-02 | 4.23E-01 | LC/MS Pos Late  | <a href="#">HMDB13288</a> |          | 100006620 |
| Dihomo-linoleoylcarnitine (C20:2)*        | Lipid                  | Fatty Acid Metabolism (Acyl Carnitine, Polyunsaturated) | 0.94 (0.87, 1.01) | 9.81E-02 | 4.23E-01 | LC/MS Pos Late  |                           |          | 100015839 |
| Eicosenedioate (C20:1-DC)*                | Lipid                  | Fatty Acid, Dicarboxylate                               | 0.94 (0.87, 1.01) | 9.88E-02 | 4.23E-01 | LC/MS Neg       |                           |          | 100021105 |
| 3-Acetylphenol sulfate                    | Xenobiotics            | Chemical                                                | 1.06 (0.99, 1.15) | 9.88E-02 | 4.23E-01 | LC/MS Neg       |                           |          | 100004326 |
| 2-Hydroxyacetaminophen sulfate*           | Xenobiotics            | Drug - Analgesics, Anesthetics                          | 0.94 (0.87, 1.01) | 1.03E-01 | 4.32E-01 | LC/MS Neg       |                           | 86290013 | 100001791 |
| Glycocholate glucuronide (1)              | Lipid                  | Primary Bile Acid Metabolism                            | 0.94 (0.87, 1.01) | 1.03E-01 | 4.32E-01 | LC/MS Neg       |                           |          | 100009259 |
| LysoPI (18:2)*                            | Lipid                  | Lysophospholipid                                        | 0.94 (0.87, 1.01) | 1.03E-01 | 4.32E-01 | LC/MS Neg       |                           |          | 100001778 |
| SM (d18:2/23:1)*                          | Lipid                  | Sphingomyelins                                          | 0.94 (0.87, 1.01) | 1.03E-01 | 4.32E-01 | LC/MS Pos Late  |                           |          | 100015791 |
| Oxalate (ethanedioate)                    | Cofactors and Vitamins | Ascorbate and Aldarate Metabolism                       | 0.94 (0.87, 1.01) | 1.04E-01 | 4.32E-01 | LC/MS Neg       | <a href="#">HMDB02329</a> | 971      | 100000841 |
| Linoleoyl ethanolamide                    | Lipid                  | Endocannabinoid                                         | 0.94 (0.88, 1.01) | 1.06E-01 | 4.36E-01 | LC/MS Neg       | <a href="#">HMDB12252</a> | 5283446  | 100006726 |
| Succinate                                 | Energy                 | TCA Cycle                                               | 0.94 (0.88, 1.01) | 1.06E-01 | 4.36E-01 | LC/MS Neg       | <a href="#">HMDB00254</a> | 1110     | 252       |
| SM (d17:1/16:0, d18:1/15:0, d16:1/17:0)*  | Lipid                  | Sphingomyelins                                          | 0.94 (0.87, 1.01) | 1.06E-01 | 4.36E-01 | LC/MS Pos Late  |                           |          | 100006314 |
| 1-Methylnicotinamide                      | Cofactors and Vitamins | Nicotinate and Nicotinamide Metabolism                  | 0.94 (0.87, 1.01) | 1.07E-01 | 4.36E-01 | LC/MS Pos Early | <a href="#">HMDB00699</a> | 457      | 55        |
| 3-Methoxycatechol sulfate (2)             | Xenobiotics            | Benzoate Metabolism                                     | 1.06 (0.99, 1.14) | 1.07E-01 | 4.36E-01 | LC/MS Neg       |                           |          | 100006376 |
| Sucralose                                 | Xenobiotics            | Food Component/Plant                                    | 1.06 (0.99, 1.14) | 1.10E-01 | 4.45E-01 | LC/MS Neg       | <a href="#">HMDB31554</a> | 71485    | 100001789 |
| PS (18:0/20:4)                            | Lipid                  | Phosphatidylserine (PS)                                 | 0.94 (0.87, 1.01) | 1.11E-01 | 4.47E-01 | LC/MS Pos Late  | <a href="#">HMDB12383</a> |          | 100001872 |
| PE (18:0/18:2)*                           | Lipid                  | Phosphatidylethanolamine (PE)                           | 0.94 (0.87, 1.01) | 1.12E-01 | 4.51E-01 | LC/MS Pos Late  | <a href="#">HMDB08994</a> | 9546749  | 100008976 |
| 4-Acetaminophen sulfate                   | Xenobiotics            | Drug - Analgesics, Anesthetics                          | 0.94 (0.87, 1.01) | 1.14E-01 | 4.57E-01 | LC/MS Neg       | <a href="#">HMDB59911</a> | 83939    | 2049      |
| Glycoursodeoxycholate                     | Lipid                  | Secondary Bile Acid Metabolism                          | 0.94 (0.87, 1.01) | 1.15E-01 | 4.58E-01 | LC/MS Neg       | <a href="#">HMDB00708</a> | 12310288 | 100002911 |
| 3-Methyl catechol sulfate (1)             | Xenobiotics            | Benzoate Metabolism                                     | 1.06 (0.99, 1.14) | 1.16E-01 | 4.60E-01 | LC/MS Neg       |                           |          | 100004112 |
| Glyco-β-muricholate**                     | Lipid                  | Primary Bile Acid Metabolism                            | 0.94 (0.87, 1.02) | 1.17E-01 | 4.60E-01 | LC/MS Neg       |                           |          | 100020214 |
| N-Acetyltyrosine                          | Amino Acid             | Tyrosine Metabolism                                     | 1.06 (0.99, 1.13) | 1.17E-01 | 4.61E-01 | LC/MS Neg       | <a href="#">HMDB00866</a> | 68310    | 100001104 |
| Vanillylmandelate (VMA)                   | Amino Acid             | Tyrosine Metabolism                                     | 0.94 (0.87, 1.02) | 1.18E-01 | 4.61E-01 | LC/MS Neg       | <a href="#">HMDB00291</a> | 1245     | 1111      |
| Propionylglycine                          | Lipid                  | Fatty Acid Metabolism (also BCAA Metabolism)            | 0.94 (0.88, 1.02) | 1.20E-01 | 4.67E-01 | LC/MS Polar     | <a href="#">HMDB00783</a> | 98681    | 100001150 |
| Phosphoethanolamine                       | Lipid                  | Phospholipid Metabolism                                 | 0.95 (0.88, 1.01) | 1.20E-01 | 4.67E-01 | LC/MS Pos Early | <a href="#">HMDB00224</a> | 1015     | 1026      |
| Pregnenetriol sulfate*                    | Lipid                  | Pregnenolone Steroids                                   | 1.06 (0.98, 1.15) | 1.22E-01 | 4.72E-01 | LC/MS Neg       |                           |          | 100021103 |
| PI (18:0/20:4)                            | Lipid                  | Phosphatidylinositol (PI)                               | 0.94 (0.88, 1.02) | 1.24E-01 | 4.76E-01 | LC/MS Pos Late  | <a href="#">HMDB09815</a> |          | 100000616 |
| Aconitate [cis or trans]                  | Energy                 | TCA Cycle                                               | 0.94 (0.88, 1.02) | 1.25E-01 | 4.77E-01 | LC/MS Neg       |                           |          | 100001359 |
| 3-(N-Acetyl-L-cystein-S-yl) acetaminophen | Xenobiotics            | Drug - Analgesics, Anesthetics                          | 0.94 (0.88, 1.02) | 1.26E-01 | 4.77E-01 | LC/MS Neg       |                           | 83967    | 2048      |
| N-Acetyl-aspartyl-glutamate (NAAG)        | Amino Acid             | Glutamate Metabolism                                    | 0.94 (0.87, 1.02) | 1.26E-01 | 4.77E-01 | LC/MS Pos Early | <a href="#">HMDB01067</a> | 5255     | 100001612 |
| Paraxanthine                              | Xenobiotics            | Xanthine Metabolism                                     | 0.94 (0.87, 1.02) | 1.27E-01 | 4.78E-01 | LC/MS Neg       | <a href="#">HMDB01860</a> | 4687     | 100000453 |
| Eicosanedioate (C20-DC)                   | Lipid                  | Fatty Acid, Dicarboxylate                               | 0.94 (0.87, 1.02) | 1.28E-01 | 4.79E-01 | LC/MS Neg       |                           | 75502    | 100002951 |
| Malate                                    | Energy                 | TCA Cycle                                               | 0.94 (0.88, 1.02) | 1.28E-01 | 4.79E-01 | LC/MS Neg       | <a href="#">HMDB00156</a> | 525      | 409       |
| Hydroxyasparagine**                       | Amino Acid             | Alanine and Aspartate Metabolism                        | 1.07 (0.98, 1.16) | 1.29E-01 | 4.79E-01 | LC/MS Pos Early | <a href="#">HMDB32332</a> | 97663    | 100020205 |



|                                                                    |                        |                                                              |                   |          |          |                 |                           |          |           |
|--------------------------------------------------------------------|------------------------|--------------------------------------------------------------|-------------------|----------|----------|-----------------|---------------------------|----------|-----------|
| 2,4-Di-tert-butylphenol                                            | Xenobiotics            | Chemical                                                     | 0.94 (0.88, 1.02) | 1.30E-01 | 4.81E-01 | LC/MS Neg       |                           |          | 100021918 |
| 6-Bromotryptophan                                                  | Amino Acid             | Tryptophan Metabolism                                        | 1.06 (0.98, 1.15) | 1.33E-01 | 4.91E-01 | LC/MS Neg       |                           |          | 100020414 |
| Lignoceroylcarnitine (C24)*                                        | Lipid                  | Fatty Acid Metabolism (Acyl Carnitine, Long Chain Saturated) | 0.94 (0.87, 1.02) | 1.35E-01 | 4.95E-01 | LC/MS Pos Late  |                           |          | 100015834 |
| Carotene diol (1)                                                  | Cofactors and Vitamins | Vitamin A Metabolism                                         | 0.94 (0.88, 1.02) | 1.37E-01 | 5.02E-01 | LC/MS Pos Late  |                           |          | 100015966 |
| 5 $\alpha$ -Androstan-3 $\alpha$ ,17 $\beta$ -diol monosulfate (1) | Lipid                  | Androgenic Steroids                                          | 1.06 (0.98, 1.14) | 1.38E-01 | 5.03E-01 | LC/MS Neg       |                           |          | 100002018 |
| SM (d18:1/20:0, d16:1/22:0)*                                       | Lipid                  | Sphingomyelins                                               | 0.95 (0.88, 1.02) | 1.39E-01 | 5.03E-01 | LC/MS Pos Late  | <a href="#">HMDB12102</a> |          | 100006290 |
| 5 $\alpha$ -Pregnan-3 $\beta$ ,20 $\beta$ -diol monosulfate (1)    | Lipid                  | Progestin Steroids                                           | 1.07 (0.98, 1.16) | 1.40E-01 | 5.05E-01 | LC/MS Neg       |                           |          | 100002009 |
| Androsterone sulfate                                               | Lipid                  | Androgenic Steroids                                          | 1.06 (0.98, 1.14) | 1.42E-01 | 5.09E-01 | LC/MS Neg       | <a href="#">HMDB02759</a> | 159663   | 100001073 |
| 3-Hydroxy-3-methylglutarate                                        | Lipid                  | Mevalonate Metabolism                                        | 0.94 (0.88, 1.02) | 1.42E-01 | 5.09E-01 | LC/MS Polar     | <a href="#">HMDB00355</a> | 1662     | 112       |
| PC (16:0/18:1)                                                     | Lipid                  | Phosphatidylcholine (PC)                                     | 0.95 (0.88, 1.02) | 1.46E-01 | 5.22E-01 | LC/MS Pos Late  | <a href="#">HMDB07972</a> | 6436017  | 1539      |
| PC (16:0/20:3n3 or 6)*                                             | Lipid                  | Phosphatidylcholine (PC)                                     | 0.95 (0.88, 1.02) | 1.47E-01 | 5.24E-01 | LC/MS Pos Late  |                           |          | 100008985 |
| Oleoylcarnitine (C18:1)                                            | Lipid                  | Fatty Acid Metabolism (Acyl Carnitine, Monounsaturated)      | 0.94 (0.87, 1.02) | 1.48E-01 | 5.25E-01 | LC/MS Pos Late  | <a href="#">HMDB05065</a> | 6441392  | 100001501 |
| Arginine                                                           | Amino Acid             | Urea cycle; Arginine and Proline Metabolism                  | 0.95 (0.88, 1.02) | 1.50E-01 | 5.27E-01 | LC/MS Pos Early | <a href="#">HMDB00517</a> | 232      | 231       |
| 4-Hydroxycoumarin                                                  | Xenobiotics            | Drug - Cardiovascular                                        | 0.95 (0.88, 1.02) | 1.51E-01 | 5.27E-01 | LC/MS Neg       |                           | 54682930 | 100002049 |
| SM (d18:1/20:1, d18:2/20:0)*                                       | Lipid                  | Sphingomyelins                                               | 0.95 (0.88, 1.02) | 1.51E-01 | 5.27E-01 | LC/MS Pos Late  |                           |          | 100006292 |
| Methionine sulfoxide                                               | Amino Acid             | Methionine, Cysteine, SAM and Taurine Metabolism             | 0.95 (0.88, 1.02) | 1.52E-01 | 5.27E-01 | LC/MS Pos Early | <a href="#">HMDB02005</a> | 158980   | 100000039 |
| Glycerol 3-phosphate                                               | Lipid                  | Glycerolipid Metabolism                                      | 1.06 (0.98, 1.14) | 1.52E-01 | 5.27E-01 | LC/MS Pos Early | <a href="#">HMDB00126</a> | 754      | 100000258 |
| 5 $\alpha$ -Androstan-3 $\beta$ ,17 $\beta$ -diol monosulfate (2)  | Lipid                  | Androgenic Steroids                                          | 1.06 (0.98, 1.14) | 1.52E-01 | 5.27E-01 | LC/MS Neg       |                           |          | 100002024 |
| 4-Acetamidophenylglucuronide                                       | Xenobiotics            | Drug - Analgesics, Anesthetics                               | 0.95 (0.88, 1.02) | 1.54E-01 | 5.32E-01 | LC/MS Neg       | <a href="#">HMDB10316</a> | 83944    | 100000043 |
| 4-Hydroxyphenylacetylglutamine                                     | Peptide                | Acetylated Peptides                                          | 0.94 (0.87, 1.02) | 1.61E-01 | 5.51E-01 | LC/MS Pos Early |                           |          | 100010850 |
| Carotene diol (2)                                                  | Cofactors and Vitamins | Vitamin A Metabolism                                         | 0.95 (0.88, 1.02) | 1.64E-01 | 5.59E-01 | LC/MS Pos Late  |                           |          | 100015967 |
| 3-(Methylthio)acetaminophen sulfate*                               | Xenobiotics            | Drug - Analgesics, Anesthetics                               | 0.95 (0.88, 1.02) | 1.65E-01 | 5.59E-01 | LC/MS Neg       |                           |          | 100020827 |
| Allantoin                                                          | Nucleotide             | Purine Metabolism, (Hypo)Xanthine/Inosine containing         | 0.95 (0.88, 1.02) | 1.66E-01 | 5.59E-01 | LC/MS Polar     | <a href="#">HMDB00462</a> | 204      | 1002      |
| Glycerate                                                          | Carbohydrate           | Glycolysis, Gluconeogenesis, and Pyruvate Metabolism         | 0.95 (0.88, 1.02) | 1.66E-01 | 5.59E-01 | LC/MS Polar     | <a href="#">HMDB00139</a> | 752      | 1052      |
| Maltol sulfate                                                     | Xenobiotics            | Food Component/Plant                                         | 1.05 (0.98, 1.13) | 1.66E-01 | 5.59E-01 | LC/MS Neg       |                           |          | 100006106 |
| 3 $\beta$ -Dydoxy-5-cholestenoate                                  | Lipid                  | Sterol                                                       | 0.95 (0.88, 1.02) | 1.67E-01 | 5.59E-01 | LC/MS Neg       |                           | 165511   | 100006370 |
| 3-(3-Hydroxyphenyl)propionate                                      | Xenobiotics            | Benzoate Metabolism                                          | 0.95 (0.88, 1.02) | 1.67E-01 | 5.59E-01 | LC/MS Neg       | <a href="#">HMDB00375</a> | 91       | 100001624 |
| Nonadecanoate (19:0)                                               | Lipid                  | Long Chain Saturated Fatty Acid                              | 0.95 (0.88, 1.02) | 1.68E-01 | 5.59E-01 | LC/MS Neg       | <a href="#">HMDB00772</a> | 12591    | 892       |
| Erucate (22:1n9)                                                   | Lipid                  | Long Chain Monounsaturated Fatty Acid                        | 0.95 (0.88, 1.02) | 1.70E-01 | 5.62E-01 | LC/MS Neg       | <a href="#">HMDB02068</a> | 5281116  | 1087      |
| Formiminoglutamate                                                 | Amino Acid             | Histidine Metabolism                                         | 1.05 (0.98, 1.14) | 1.71E-01 | 5.66E-01 | LC/MS Pos Early | <a href="#">HMDB00854</a> | 439233   | 100002500 |
| N6-Carbamoylthreonyladenosine                                      | Nucleotide             | Purine Metabolism, Adenine containing                        | 1.05 (0.98, 1.14) | 1.73E-01 | 5.70E-01 | LC/MS Neg       | <a href="#">HMDB41623</a> | 161466   | 100001415 |



|                                             |                        |                                                              |                   |          |          |                 |                           |          |           |
|---------------------------------------------|------------------------|--------------------------------------------------------------|-------------------|----------|----------|-----------------|---------------------------|----------|-----------|
| Ethyl glucuronide                           | Xenobiotics            | Chemical                                                     | 0.95 (0.88, 1.02) | 1.76E-01 | 5.76E-01 | LC/MS Neg       | <a href="#">HMDB10325</a> | 152226   | 100002849 |
| Threonate                                   | Cofactors and Vitamins | Ascorbate and Aldarate Metabolism                            | 0.95 (0.88, 1.02) | 1.77E-01 | 5.77E-01 | LC/MS Polar     | <a href="#">HMDB00943</a> | 151152   | 100001022 |
| N-Acetylneuraminic acid                     | Carbohydrate           | Nicotinate and Nicotinamide Metabolism                       | 0.95 (0.88, 1.02) | 1.79E-01 | 5.79E-01 | LC/MS Pos Early | <a href="#">HMDB00230</a> | 439197   | 1162      |
| γ-Glutamylcitrulline*                       | Peptide                | Gamma-glutamyl Amino Acid                                    | 0.95 (0.88, 1.02) | 1.79E-01 | 5.79E-01 | LC/MS Pos Early |                           |          | 100020241 |
| SM (d18:1/16:0(OH))**                       | Lipid                  | Sphingomyelins                                               | 0.95 (0.88, 1.02) | 1.80E-01 | 5.79E-01 | LC/MS Pos Late  |                           |          | 100021000 |
| Epiandrosterone sulfate                     | Lipid                  | Androgenic Steroids                                          | 1.05 (0.98, 1.14) | 1.81E-01 | 5.79E-01 | LC/MS Neg       |                           | 9929317  | 100001287 |
| 2-Naphthol sulfate                          | Xenobiotics            | Chemical                                                     | 1.05 (0.98, 1.14) | 1.81E-01 | 5.79E-01 | LC/MS Neg       |                           | 74428    | 100020515 |
| Glycosyl ceramide (d18:1/20:0, d16:1/22:0)* | Lipid                  | Hexosylceramides (HCER)                                      | 0.95 (0.88, 1.02) | 1.81E-01 | 5.79E-01 | LC/MS Pos Late  |                           |          | 100015882 |
| Eicosapentaenoate (EPA; 20:5n3)             | Lipid                  | Long Chain Polyunsaturated Fatty Acid (n3 and n6)            | 0.95 (0.88, 1.02) | 1.83E-01 | 5.82E-01 | LC/MS Neg       | <a href="#">HMDB01999</a> | 446284   | 2050      |
| PE (16:0/18:2)                              | Lipid                  | Phosphatidylethanolamine (PE)                                | 0.95 (0.88, 1.03) | 1.87E-01 | 5.91E-01 | LC/MS Pos Late  | <a href="#">HMDB05322</a> | 9546747  | 100001870 |
| Dihydroorotate                              | Nucleotide             | Pyrimidine Metabolism, Orotate containing                    | 1.05 (0.98, 1.13) | 1.87E-01 | 5.91E-01 | LC/MS Polar     | <a href="#">HMDB03349</a> | 648      | 923       |
| Sebacate (C10-DC)                           | Lipid                  | Fatty Acid, Dicarboxylate                                    | 0.95 (0.88, 1.02) | 1.89E-01 | 5.95E-01 | LC/MS Polar     | <a href="#">HMDB00792</a> | 5192     | 100001211 |
| 4-Methylguaiaicol sulfate                   | Xenobiotics            | Benzoate Metabolism                                          | 1.05 (0.98, 1.13) | 1.90E-01 | 5.95E-01 | LC/MS Neg       |                           |          | 100006105 |
| Ascorbic acid 2-sulfate                     | Cofactors and Vitamins | Ascorbate and Aldarate Metabolism                            | 0.95 (0.88, 1.03) | 1.91E-01 | 5.95E-01 | LC/MS Polar     |                           | 86484    | 100009329 |
| cis-3,4-Methyleneheptanoylglycine           | Lipid                  | Fatty Acid Metabolism (Acyl Glycine)                         | 0.95 (0.88, 1.03) | 1.92E-01 | 5.96E-01 | LC/MS Neg       |                           |          | 100021992 |
| Deoxycholate                                | Lipid                  | Secondary Bile Acid Metabolism                               | 0.95 (0.89, 1.02) | 1.94E-01 | 6.00E-01 | LC/MS Pos Late  | <a href="#">HMDB00626</a> | 222528   | 302       |
| Linoleate (18:2n6)                          | Lipid                  | Long Chain Polyunsaturated Fatty Acid (n3 and n6)            | 0.95 (0.89, 1.03) | 1.94E-01 | 6.00E-01 | LC/MS Neg       | <a href="#">HMDB00673</a> | 5280450  | 180       |
| Hydantoin-5-propionate                      | Amino Acid             | Histidine Metabolism                                         | 1.05 (0.98, 1.13) | 1.95E-01 | 6.00E-01 | LC/MS Polar     | <a href="#">HMDB01212</a> | 782      | 100002514 |
| Cerotoylcarnitine (C26)*                    | Lipid                  | Fatty Acid Metabolism (Acyl Carnitine, Long Chain Saturated) | 0.95 (0.88, 1.03) | 1.96E-01 | 6.01E-01 | LC/MS Pos Late  | <a href="#">HMDB06347</a> |          | 100015835 |
| Thyroxine                                   | Amino Acid             | Tyrosine Metabolism                                          | 1.05 (0.97, 1.14) | 1.96E-01 | 6.01E-01 | LC/MS Neg       | <a href="#">HMDB01918</a> | 5819     | 1094      |
| Galactonate                                 | Carbohydrate           | Fructose, Mannose and Galactose Metabolism                   | 0.95 (0.88, 1.03) | 1.98E-01 | 6.02E-01 | LC/MS Polar     | <a href="#">HMDB00565</a> | 128869   | 100001026 |
| Dihomo-linolenoylcarnitine (C20:3n3 or 6)*  | Lipid                  | Fatty Acid Metabolism (Acyl Carnitine, Polyunsaturated)      | 0.95 (0.88, 1.03) | 1.99E-01 | 6.02E-01 | LC/MS Pos Late  |                           |          | 100015840 |
| Pregnanolone/allopregnanolone sulfate       | Lipid                  | Progestin Steroids                                           | 1.06 (0.97, 1.15) | 2.00E-01 | 6.02E-01 | LC/MS Neg       |                           |          | 100006173 |
| Nicotinamide                                | Cofactors and Vitamins | Nicotinate and Nicotinamide Metabolism                       | 0.96 (0.89, 1.02) | 2.02E-01 | 6.02E-01 | LC/MS Pos Early | <a href="#">HMDB01406</a> | 936      | 432       |
| Taurodeoxycholate                           | Lipid                  | Secondary Bile Acid Metabolism                               | 0.95 (0.88, 1.03) | 2.02E-01 | 6.02E-01 | LC/MS Neg       | <a href="#">HMDB00896</a> | 2733768  | 1668      |
| Methionine                                  | Amino Acid             | Methionine, Cysteine, SAM and Taurine Metabolism             | 0.95 (0.88, 1.03) | 2.03E-01 | 6.02E-01 | LC/MS Pos Early | <a href="#">HMDB00696</a> | 6137     | 415       |
| Arachidonoylcarnitine (C20:4)               | Lipid                  | Fatty Acid Metabolism (Acyl Carnitine, Polyunsaturated)      | 0.95 (0.88, 1.03) | 2.04E-01 | 6.02E-01 | LC/MS Pos Late  |                           |          | 100015837 |
| 2-Aminooctanoate                            | Lipid                  | Fatty Acid, Amino                                            | 0.95 (0.88, 1.03) | 2.04E-01 | 6.02E-01 | LC/MS Pos Late  | <a href="#">HMDB00991</a> | 69522    | 100004227 |
| β-Citrylglycinate                           | Amino Acid             | Glutamate Metabolism                                         | 0.96 (0.89, 1.02) | 2.04E-01 | 6.02E-01 | LC/MS Neg       |                           | 72715786 | 100003271 |
| γ-Glutamylmethionine                        | Peptide                | Gamma-glutamyl Amino Acid                                    | 0.95 (0.88, 1.03) | 2.04E-01 | 6.02E-01 | LC/MS Pos Early | <a href="#">HMDB29155</a> | 7009567  | 100001313 |
| 4-Hydroxyhippurate                          | Xenobiotics            | Benzoate Metabolism                                          | 0.95 (0.88, 1.03) | 2.05E-01 | 6.02E-01 | LC/MS Neg       | <a href="#">HMDB13678</a> | 151012   | 100001423 |

|                                                 |              |                                                              |                   |          |          |                 |                           |          |           |
|-------------------------------------------------|--------------|--------------------------------------------------------------|-------------------|----------|----------|-----------------|---------------------------|----------|-----------|
| 2-Hydroxynervonate*                             | Lipid        | Fatty Acid, Monohydroxy                                      | 0.95 (0.89, 1.03) | 2.08E-01 | 6.10E-01 | LC/MS Neg       |                           | 5312783  | 100015638 |
| 3 $\beta$ ,7 $\beta$ -Dihydroxy-5-cholestenoate | Lipid        | Sterol                                                       | 1.05 (0.97, 1.14) | 2.10E-01 | 6.10E-01 | LC/MS Neg       |                           |          | 100001774 |
| 4-Ethylcatechol sulfate                         | Xenobiotics  | Benzoate Metabolism                                          | 1.05 (0.97, 1.13) | 2.10E-01 | 6.10E-01 | LC/MS Neg       |                           |          | 100020536 |
| Decanoylcarnitine (C10)                         | Lipid        | Fatty Acid Metabolism (Acyl Carnitine, Medium Chain)         | 1.05 (0.97, 1.13) | 2.10E-01 | 6.10E-01 | LC/MS Pos Late  | <a href="#">HMDB00651</a> | 10245190 | 100001251 |
| Hexadecaphingosine (d16:1)*                     | Lipid        | Sphingosines                                                 | 0.96 (0.89, 1.03) | 2.13E-01 | 6.12E-01 | LC/MS Pos Late  |                           |          | 100015723 |
| N-Stearoylserine*                               | Lipid        | Endocannabinoid                                              | 0.95 (0.89, 1.03) | 2.13E-01 | 6.12E-01 | LC/MS Neg       |                           |          | 100019957 |
| Enterolactone sulfate                           | Xenobiotics  | Food Component/Plant                                         | 0.95 (0.88, 1.03) | 2.13E-01 | 6.12E-01 | LC/MS Neg       |                           |          | 100020407 |
| 3-Hydroxypyridine sulfate                       | Xenobiotics  | Chemical                                                     | 1.05 (0.97, 1.13) | 2.15E-01 | 6.12E-01 | LC/MS Neg       |                           |          | 100006098 |
| SM (d18:1/22:2, d18:2/22:1, d16:1/24:2)*        | Lipid        | Sphingomyelins                                               | 0.95 (0.89, 1.03) | 2.15E-01 | 6.12E-01 | LC/MS Pos Late  |                           |          | 100006296 |
| Theophylline                                    | Xenobiotics  | Xanthine Metabolism                                          | 0.95 (0.88, 1.03) | 2.15E-01 | 6.12E-01 | LC/MS Neg       | <a href="#">HMDB01889</a> | 2153     | 100000437 |
| SM (d18:2/18:1)*                                | Lipid        | Sphingomyelins                                               | 0.95 (0.89, 1.03) | 2.17E-01 | 6.13E-01 | LC/MS Pos Late  |                           |          | 100015788 |
| Sphingosine                                     | Lipid        | Sphingosines                                                 | 0.96 (0.90, 1.03) | 2.18E-01 | 6.13E-01 | LC/MS Pos Late  | <a href="#">HMDB00252</a> | 5353955  | 297       |
| Betaine                                         | Amino Acid   | Glycine, Serine and Threonine Metabolism                     | 0.95 (0.88, 1.03) | 2.18E-01 | 6.13E-01 | LC/MS Pos Early | <a href="#">HMDB00043</a> | 247      | 799       |
| Isovalerylglycine                               | Amino Acid   | Leucine, Isoleucine and Valine Metabolism                    | 0.95 (0.89, 1.03) | 2.19E-01 | 6.13E-01 | LC/MS Neg       | <a href="#">HMDB00678</a> | 546304   | 100001452 |
| Citrate                                         | Energy       | TCA Cycle                                                    | 0.95 (0.89, 1.03) | 2.19E-01 | 6.13E-01 | LC/MS Neg       | <a href="#">HMDB00094</a> | 311      | 1124      |
| 4-Acetamidophenol                               | Xenobiotics  | Drug - Analgesics, Anesthetics                               | 0.96 (0.89, 1.03) | 2.19E-01 | 6.13E-01 | LC/MS Pos Early | <a href="#">HMDB01859</a> | 1983     | 1383      |
| $\gamma$ -Glutamylglutamate                     | Peptide      | Gamma-glutamyl Amino Acid                                    | 0.96 (0.89, 1.03) | 2.22E-01 | 6.19E-01 | LC/MS Pos Early | <a href="#">HMDB11737</a> | 92865    | 331       |
| Succinoyltaurine                                | Amino Acid   | Methionine, Cysteine, SAM and Taurine Metabolism             | 0.96 (0.89, 1.03) | 2.23E-01 | 6.19E-01 | LC/MS Polar     |                           |          | 100021220 |
| Saccharin                                       | Xenobiotics  | Food Component/Plant                                         | 0.96 (0.89, 1.03) | 2.25E-01 | 6.22E-01 | LC/MS Neg       | <a href="#">HMDB29723</a> | 5143     | 100000870 |
| DihydroSM (d18:0/20:0, d16:0/22:0)*             | Lipid        | Dihydrosphingomyelins                                        | 1.05 (0.97, 1.13) | 2.26E-01 | 6.22E-01 | LC/MS Pos Late  |                           |          | 100015786 |
| Linoleoylcholine*                               | Lipid        | Fatty Acid Metabolism (Acyl Choline)                         | 0.96 (0.89, 1.03) | 2.27E-01 | 6.23E-01 | LC/MS Pos Late  |                           |          | 100015760 |
| Homostachydrine*                                | Xenobiotics  | Food Component/Plant                                         | 0.95 (0.88, 1.03) | 2.28E-01 | 6.23E-01 | LC/MS Pos Early | <a href="#">HMDB33433</a> | 441447   | 100001550 |
| Glucose                                         | Carbohydrate | Glycolysis, Gluconeogenesis, and Pyruvate Metabolism         | 0.96 (0.89, 1.03) | 2.28E-01 | 6.23E-01 | LC/MS Polar     | <a href="#">HMDB00122</a> | 5793     | 572       |
| N- $\delta$ -Acetylorithine                     | Amino Acid   | Urea cycle; Arginine and Proline Metabolism                  | 0.95 (0.88, 1.03) | 2.30E-01 | 6.23E-01 | LC/MS Polar     |                           | 9920500  | 100004523 |
| Pyrraline                                       | Xenobiotics  | Food Component/Plant                                         | 0.96 (0.89, 1.03) | 2.31E-01 | 6.23E-01 | LC/MS Neg       | <a href="#">HMDB33143</a> | 122228   | 100001767 |
| Alanine                                         | Amino Acid   | Alanine and Aspartate Metabolism                             | 0.96 (0.89, 1.03) | 2.33E-01 | 6.23E-01 | LC/MS Pos Early | <a href="#">HMDB00161</a> | 5950     | 811       |
| 2-Isopropylmalate                               | Xenobiotics  | Food Component/Plant                                         | 1.05 (0.97, 1.12) | 2.34E-01 | 6.23E-01 | LC/MS Neg       | <a href="#">HMDB00402</a> | 77       | 100000409 |
| Glycosyl ceramide (d18:1/23:1, d17:1/24:1)*     | Lipid        | Hexosylceramides (HCER)                                      | 1.04 (0.97, 1.12) | 2.34E-01 | 6.23E-01 | LC/MS Pos Late  |                           |          | 100015751 |
| Cortisol                                        | Lipid        | Corticosteroids                                              | 1.05 (0.97, 1.13) | 2.35E-01 | 6.23E-01 | LC/MS Neg       | <a href="#">HMDB00063</a> | 5754     | 356       |
| Behenoylcarnitine (C22)*                        | Lipid        | Fatty Acid Metabolism (Acyl Carnitine, Long Chain Saturated) | 0.96 (0.89, 1.03) | 2.36E-01 | 6.23E-01 | LC/MS Pos Late  |                           |          | 100015832 |
| 2-Methylserine                                  | Amino Acid   | Glycine, Serine and Threonine Metabolism                     | 0.95 (0.88, 1.03) | 2.36E-01 | 6.23E-01 | LC/MS Pos Early |                           | 94309    | 100009246 |
| N-Acetyltryptophan                              | Amino Acid   | Tryptophan Metabolism                                        | 1.05 (0.97, 1.13) | 2.37E-01 | 6.23E-01 | LC/MS Neg       | <a href="#">HMDB13713</a> | 700653   | 100001254 |

|                                                                  |                        |                                                              |                   |          |          |                 |                           |         |           |
|------------------------------------------------------------------|------------------------|--------------------------------------------------------------|-------------------|----------|----------|-----------------|---------------------------|---------|-----------|
| Guaiacol sulfate                                                 | Xenobiotics            | Benzoate Metabolism                                          | 1.05 (0.97, 1.13) | 2.37E-01 | 6.23E-01 | LC/MS Neg       | <a href="#">HMDB60013</a> | 22473   | 100004208 |
| Isovalerate (i5:0)                                               | Amino Acid             | Leucine, Isoleucine and Valine Metabolism                    | 0.96 (0.89, 1.03) | 2.38E-01 | 6.23E-01 | LC/MS Neg       | <a href="#">HMDB00718</a> | 10430   | 100000708 |
| N-Oleoylserine                                                   | Lipid                  | Endocannabinoid                                              | 0.96 (0.89, 1.03) | 2.38E-01 | 6.23E-01 | LC/MS Neg       |                           |         | 100015641 |
| (14 or 15)-Methylpalmitate (a17:0 or i17:0)                      | Lipid                  | Fatty Acid, Branched                                         | 0.96 (0.89, 1.03) | 2.38E-01 | 6.23E-01 | LC/MS Neg       |                           |         | 100002945 |
| Hyochoolate                                                      | Lipid                  | Secondary Bile Acid Metabolism                               | 0.96 (0.89, 1.03) | 2.38E-01 | 6.23E-01 | LC/MS Neg       | <a href="#">HMDB00760</a> | 92805   | 100001279 |
| SM (d18:1/17:0, d17:1/18:0, d19:1/16:0)                          | Lipid                  | Sphingomyelins                                               | 0.96 (0.89, 1.03) | 2.40E-01 | 6.27E-01 | LC/MS Pos Late  |                           |         | 100008920 |
| Adenosine 5'-diphosphate (ADP)                                   | Nucleotide             | Purine Metabolism, Adenine containing                        | 0.96 (0.88, 1.03) | 2.45E-01 | 6.35E-01 | LC/MS Neg       | <a href="#">HMDB01341</a> | 6022    | 208       |
| N-Acetylcarnosine                                                | Amino Acid             | Histidine Metabolism                                         | 1.05 (0.97, 1.13) | 2.45E-01 | 6.35E-01 | LC/MS Neg       | <a href="#">HMDB12881</a> | 9903482 | 100004046 |
| PC (16:0/16:0)                                                   | Lipid                  | Phosphatidylcholine (PC)                                     | 0.96 (0.89, 1.03) | 2.46E-01 | 6.35E-01 | LC/MS Pos Late  | <a href="#">HMDB00564</a> | 452110  | 100000657 |
| LysoPC (20:4n6)*                                                 | Lipid                  | Lysophospholipid                                             | 0.96 (0.89, 1.03) | 2.46E-01 | 6.35E-01 | LC/MS Pos Late  | <a href="#">HMDB10395</a> |         | 100001551 |
| 3-Bromo-5-chloro-2,6-dihydroxybenzoic acid*                      | Xenobiotics            | Chemical                                                     | 0.96 (0.89, 1.03) | 2.48E-01 | 6.36E-01 | LC/MS Neg       |                           |         | 100021707 |
| 5 $\alpha$ -Pregnan-3 $\beta$ ,20 $\alpha$ -diol monosulfate (1) | Lipid                  | Progestin Steroids                                           | 1.05 (0.97, 1.14) | 2.49E-01 | 6.36E-01 | LC/MS Neg       |                           |         | 100002013 |
| Margaroylcarnitine (C17)*                                        | Lipid                  | Fatty Acid Metabolism (Acyl Carnitine, Long Chain Saturated) | 0.96 (0.89, 1.03) | 2.49E-01 | 6.36E-01 | LC/MS Pos Late  | <a href="#">HMDB06210</a> |         | 100004054 |
| Dopamine 3-O-sulfate                                             | Amino Acid             | Tyrosine Metabolism                                          | 0.96 (0.88, 1.03) | 2.51E-01 | 6.36E-01 | LC/MS Neg       | <a href="#">HMDB06275</a> | 122136  | 100006361 |
| $\delta$ -tocopherol                                             | Cofactors and Vitamins | Tocopherol Metabolism                                        | 1.04 (0.97, 1.12) | 2.51E-01 | 6.36E-01 | LC/MS Pos Late  | <a href="#">HMDB02902</a> | 92094   | 100001216 |
| N-Acetyl-2-aminooctanoate*                                       | Lipid                  | Fatty Acid, Amino                                            | 0.95 (0.88, 1.03) | 2.51E-01 | 6.36E-01 | LC/MS Neg       | <a href="#">HMDB59745</a> | 95555   | 100020204 |
| PC (18:1/22:6)*                                                  | Lipid                  | Phosphatidylcholine (PC)                                     | 0.96 (0.89, 1.03) | 2.52E-01 | 6.36E-01 | LC/MS Pos Late  | <a href="#">HMDB08123</a> |         | 100009130 |
| 1-Methylurate                                                    | Xenobiotics            | Xanthine Metabolism                                          | 0.96 (0.89, 1.03) | 2.53E-01 | 6.36E-01 | LC/MS Neg       | <a href="#">HMDB03099</a> | 69726   | 100001400 |
| 2-Hydroxyphytanate*                                              | Lipid                  | Fatty Acid, Branched                                         | 0.96 (0.89, 1.03) | 2.55E-01 | 6.39E-01 | LC/MS Neg       |                           | 189026  | 100004414 |
| Homocitrulline                                                   | Amino Acid             | Urea cycle; Arginine and Proline Metabolism                  | 1.05 (0.97, 1.14) | 2.55E-01 | 6.39E-01 | LC/MS Polar     | <a href="#">HMDB00679</a> | 65072   | 100000963 |
| Genistein sulfate*                                               | Xenobiotics            | Food Component/Plant                                         | 0.96 (0.89, 1.03) | 2.57E-01 | 6.40E-01 | LC/MS Neg       |                           |         | 100020207 |
| Octanoylcarnitine (C8)                                           | Lipid                  | Fatty Acid Metabolism (Acyl Carnitine, Medium Chain)         | 1.04 (0.97, 1.13) | 2.59E-01 | 6.45E-01 | LC/MS Pos Late  | <a href="#">HMDB00791</a> | 123701  | 100001247 |
| Glycochenodeoxycholate                                           | Lipid                  | Primary Bile Acid Metabolism                                 | 0.96 (0.89, 1.03) | 2.62E-01 | 6.50E-01 | LC/MS Neg       | <a href="#">HMDB00637</a> | 12544   | 1628      |
| 7-Methylxanthine                                                 | Xenobiotics            | Xanthine Metabolism                                          | 0.96 (0.89, 1.03) | 2.63E-01 | 6.50E-01 | LC/MS Pos Early | <a href="#">HMDB01991</a> | 68374   | 100001396 |
| N-Methyltaurine                                                  | Amino Acid             | Methionine, Cysteine, SAM and Taurine Metabolism             | 0.96 (0.89, 1.03) | 2.64E-01 | 6.52E-01 | LC/MS Polar     |                           | 7882    | 100004056 |
| Butyrylglycine                                                   | Lipid                  | Fatty Acid Metabolism (also BCAA Metabolism)                 | 0.96 (0.88, 1.03) | 2.66E-01 | 6.53E-01 | LC/MS Neg       | <a href="#">HMDB00808</a> | 88412   | 100001151 |
| Indoleacetate                                                    | Amino Acid             | Tryptophan Metabolism                                        | 0.96 (0.89, 1.03) | 2.69E-01 | 6.59E-01 | LC/MS Neg       | <a href="#">HMDB00197</a> | 802     | 100001034 |
| Retinal                                                          | Cofactors and Vitamins | Vitamin A Metabolism                                         | 1.04 (0.97, 1.13) | 2.72E-01 | 6.64E-01 | LC/MS Pos Late  | <a href="#">HMDB01358</a> | 638015  | 100004088 |
| Trans-2-hexenoylglycine                                          | Lipid                  | Fatty Acid Metabolism (Acyl Glycine)                         | 0.96 (0.89, 1.03) | 2.73E-01 | 6.65E-01 | LC/MS Neg       |                           |         | 100019884 |
| Glychoyochoolate                                                 | Lipid                  | Secondary Bile Acid Metabolism                               | 0.96 (0.89, 1.03) | 2.75E-01 | 6.68E-01 | LC/MS Neg       |                           |         | 100004083 |
| Imidazole propionate                                             | Amino Acid             | Histidine Metabolism                                         | 1.04 (0.97, 1.12) | 2.76E-01 | 6.69E-01 | LC/MS Pos Early | <a href="#">HMDB02271</a> | 70630   | 100003434 |

|                                                                                     |                        |                                                      |                   |          |          |                 |                           |          |           |
|-------------------------------------------------------------------------------------|------------------------|------------------------------------------------------|-------------------|----------|----------|-----------------|---------------------------|----------|-----------|
| $\alpha$ -CEHC sulfate                                                              | Cofactors and Vitamins | Tocopherol Metabolism                                | 1.04 (0.97, 1.12) | 2.77E-01 | 6.69E-01 | LC/MS Neg       |                           |          | 100005972 |
| 5-Hydroxymethyl-2-furoic acid                                                       | Amino Acid             | Tyrosine Metabolism                                  | 1.04 (0.97, 1.12) | 2.78E-01 | 6.69E-01 | LC/MS Neg       | <a href="#">HMDB02432</a> | 80642    | 100003954 |
| 1-Ribosyl-imidazoleacetate*                                                         | Amino Acid             | Histidine Metabolism                                 | 0.96 (0.88, 1.04) | 2.80E-01 | 6.70E-01 | LC/MS Pos Early | <a href="#">HMDB02331</a> | 5117448  | 100001668 |
| 4-Acetamidobenzoate                                                                 | Xenobiotics            | Chemical                                             | 0.96 (0.88, 1.04) | 2.81E-01 | 6.70E-01 | LC/MS Neg       |                           | 19266    | 100009413 |
| Erythritol                                                                          | Xenobiotics            | Food Component/Plant                                 | 0.96 (0.89, 1.03) | 2.82E-01 | 6.70E-01 | LC/MS Polar     | <a href="#">HMDB02994</a> | 222285   | 100000846 |
| Methyl glucopyranoside ( $\alpha$ + $\beta$ )                                       | Xenobiotics            | Food Component/Plant                                 | 0.96 (0.88, 1.04) | 2.83E-01 | 6.70E-01 | LC/MS Neg       |                           |          | 100005864 |
| 1,5-Anhydroglucitol (1,5-AG)                                                        | Carbohydrate           | Glycolysis, Gluconeogenesis, and Pyruvate Metabolism | 0.96 (0.89, 1.03) | 2.83E-01 | 6.70E-01 | LC/MS Neg       | <a href="#">HMDB02712</a> | 64960    | 100000580 |
| Phenol sulfate                                                                      | Amino Acid             | Tyrosine Metabolism                                  | 0.96 (0.89, 1.03) | 2.84E-01 | 6.70E-01 | LC/MS Neg       | <a href="#">HMDB60015</a> | 74426    | 100001510 |
| N-Methylproline                                                                     | Amino Acid             | Urea cycle; Arginine and Proline Metabolism          | 0.96 (0.89, 1.03) | 2.84E-01 | 6.70E-01 | LC/MS Pos Early |                           | 557      | 100001956 |
| Ethylmalonate                                                                       | Amino Acid             | Leucine, Isoleucine and Valine Metabolism            | 0.96 (0.89, 1.04) | 2.84E-01 | 6.70E-01 | LC/MS Polar     | <a href="#">HMDB00622</a> | 11756    | 2054      |
| $\gamma$ -Glutamylthreonine                                                         | Peptide                | Gamma-glutamyl Amino Acid                            | 0.96 (0.89, 1.04) | 2.87E-01 | 6.75E-01 | LC/MS Pos Early | <a href="#">HMDB29159</a> | 76078708 | 100001314 |
| N-Acetyl-1-methylhistidine*                                                         | Amino Acid             | Histidine Metabolism                                 | 1.04 (0.97, 1.13) | 2.89E-01 | 6.77E-01 | LC/MS Pos Early |                           | 53859791 | 100004299 |
| 3-Carboxy-4-methyl-5-propyl-2-furanpropanoate (CMPF)                                | Lipid                  | Fatty Acid, Dicarboxylate                            | 0.96 (0.89, 1.03) | 2.90E-01 | 6.78E-01 | LC/MS Neg       | <a href="#">HMDB61112</a> | 123979   | 100001178 |
| Pristanate                                                                          | Lipid                  | Fatty Acid, Branched                                 | 0.96 (0.89, 1.03) | 2.91E-01 | 6.78E-01 | LC/MS Neg       | <a href="#">HMDB00795</a> | 123929   | 477       |
| Propyl 4-hydroxybenzoate sulfate                                                    | Xenobiotics            | Benzoate Metabolism                                  | 0.96 (0.89, 1.04) | 2.93E-01 | 6.82E-01 | LC/MS Neg       |                           |          | 100006264 |
| Ornithine                                                                           | Amino Acid             | Urea cycle; Arginine and Proline Metabolism          | 0.96 (0.89, 1.04) | 2.95E-01 | 6.83E-01 | LC/MS Pos Early | <a href="#">HMDB03374</a> | 6262     | 444       |
| PC (14:0/20:4)*                                                                     | Lipid                  | Phosphatidylcholine (PC)                             | 0.96 (0.89, 1.04) | 2.95E-01 | 6.83E-01 | LC/MS Pos Late  | <a href="#">HMDB07883</a> |          | 100009139 |
| 3-(3-Hydroxyphenyl)propionate sulfate                                               | Xenobiotics            | Benzoate Metabolism                                  | 0.96 (0.89, 1.04) | 3.02E-01 | 6.97E-01 | LC/MS Neg       |                           | 187488   | 100005391 |
| 1,2,3-Benzenetriol sulfate (2)                                                      | Xenobiotics            | Chemical                                             | 1.04 (0.97, 1.12) | 3.03E-01 | 6.98E-01 | LC/MS Neg       |                           |          | 100006374 |
| Stachydrine                                                                         | Xenobiotics            | Food Component/Plant                                 | 0.96 (0.89, 1.04) | 3.05E-01 | 6.98E-01 | LC/MS Pos Early | <a href="#">HMDB04827</a> | 115244   | 100001296 |
| Ceramide(d17:1/16:0)*                                                               | Lipid                  | Ceramides                                            | 0.96 (0.90, 1.03) | 3.05E-01 | 6.98E-01 | LC/MS Pos Late  |                           |          | 100015731 |
| Cholate                                                                             | Lipid                  | Primary Bile Acid Metabolism                         | 0.96 (0.89, 1.04) | 3.06E-01 | 6.98E-01 | LC/MS Neg       | <a href="#">HMDB00619</a> | 221493   | 136       |
| Biliverdin                                                                          | Cofactors and Vitamins | Hemoglobin and Porphyrin Metabolism                  | 1.04 (0.97, 1.11) | 3.09E-01 | 7.03E-01 | LC/MS Pos Late  | <a href="#">HMDB01008</a> | 5353439  | 250       |
| $\alpha$ -Hydroxyisocaproate                                                        | Amino Acid             | Leucine, Isoleucine and Valine Metabolism            | 1.04 (0.96, 1.12) | 3.11E-01 | 7.03E-01 | LC/MS Neg       | <a href="#">HMDB00746</a> | 83697    | 100000706 |
| 5 $\alpha$ -Pregnan-3 $\beta$ -ol,20-one sulfate                                    | Lipid                  | Progesterin Steroids                                 | 1.05 (0.96, 1.14) | 3.11E-01 | 7.03E-01 | LC/MS Neg       |                           |          | 100002035 |
| Cysteine-glutathione disulfide                                                      | Amino Acid             | Glutathione Metabolism                               | 0.96 (0.89, 1.04) | 3.11E-01 | 7.03E-01 | LC/MS Pos Early | <a href="#">HMDB00656</a> | 4247235  | 100001437 |
| Maltotetraose                                                                       | Carbohydrate           | Glycogen Metabolism                                  | 0.96 (0.90, 1.04) | 3.12E-01 | 7.04E-01 | LC/MS Neg       | <a href="#">HMDB01296</a> | 446495   | 100000275 |
| Iminodiacetate (IDA)                                                                | Xenobiotics            | Chemical                                             | 0.96 (0.89, 1.04) | 3.13E-01 | 7.04E-01 | LC/MS Pos Early | <a href="#">HMDB11753</a> | 8897     | 100000900 |
| Sulfate of piperine metabolite C <sub>16</sub> H <sub>19</sub> NO <sub>3</sub> (2)* | Xenobiotics            | Food Component/Plant                                 | 1.04 (0.97, 1.12) | 3.14E-01 | 7.05E-01 | LC/MS Neg       |                           |          | 100020496 |
| Tyramine O-sulfate                                                                  | Amino Acid             | Tyrosine Metabolism                                  | 0.96 (0.89, 1.04) | 3.16E-01 | 7.06E-01 | LC/MS Neg       | <a href="#">HMDB06409</a> | 153005   | 100006092 |
| 3-Hydroxyhippurate                                                                  | Xenobiotics            | Benzoate Metabolism                                  | 0.96 (0.89, 1.04) | 3.17E-01 | 7.07E-01 | LC/MS Neg       | <a href="#">HMDB06116</a> | 450268   | 100002122 |
| N-Succinyl-phenylalanine                                                            | Amino Acid             | Phenylalanine Metabolism                             | 0.96 (0.89, 1.04) | 3.18E-01 | 7.07E-01 | LC/MS Neg       |                           | 3131586  | 100021472 |
| Caffeic acid sulfate                                                                | Xenobiotics            | Food Component/Plant                                 | 1.04 (0.96, 1.12) | 3.21E-01 | 7.10E-01 | LC/MS Polar     | <a href="#">HMDB41708</a> |          | 100009337 |

|                                                   |                        |                                                         |                   |          |          |                 |                           |          |           |
|---------------------------------------------------|------------------------|---------------------------------------------------------|-------------------|----------|----------|-----------------|---------------------------|----------|-----------|
| Proline                                           | Amino Acid             | Urea cycle; Arginine and Proline Metabolism             | 0.96 (0.89, 1.04) | 3.21E-01 | 7.10E-01 | LC/MS Pos Early | <a href="#">HMDB00162</a> | 145742   | 480       |
| 3-Phenylpropionate (hydrocinnamate)               | Xenobiotics            | Benzoate Metabolism                                     | 0.96 (0.89, 1.04) | 3.23E-01 | 7.13E-01 | LC/MS Neg       | <a href="#">HMDB00764</a> | 107      | 100000010 |
| 5α-Pregnan-3β,20α-diol disulfate                  | Lipid                  | Progesterin Steroids                                    | 1.04 (0.96, 1.14) | 3.25E-01 | 7.15E-01 | LC/MS Neg       |                           |          | 100001988 |
| Glucuronide of piperine metabolite C17H21NO3 (5)* | Xenobiotics            | Food Component/Plant                                    | 1.04 (0.96, 1.12) | 3.26E-01 | 7.15E-01 | LC/MS Neg       |                           |          | 100020493 |
| N-Acetyltaurine                                   | Amino Acid             | Methionine, Cysteine, SAM and Taurine Metabolism        | 0.96 (0.89, 1.04) | 3.27E-01 | 7.15E-01 | LC/MS Polar     |                           | 159864   | 100005466 |
| Glycosyl-N-palmitoyl-sphingosine (d18:1/16:0)     | Lipid                  | Hexosylceramides (HCER)                                 | 0.96 (0.89, 1.04) | 3.28E-01 | 7.15E-01 | LC/MS Pos Late  |                           |          | 100009272 |
| Diacylglycerol (16:1/18:2 [2], 16:0/18:3 [1])*    | Lipid                  | Diacylglycerol                                          | 1.04 (0.96, 1.11) | 3.31E-01 | 7.15E-01 | LC/MS Pos Late  |                           |          | 100010940 |
| Cholic acid glucuronide                           | Lipid                  | Primary Bile Acid Metabolism                            | 0.97 (0.90, 1.03) | 3.31E-01 | 7.15E-01 | LC/MS Neg       |                           |          | 100020549 |
| Stearate (18:0)                                   | Lipid                  | Long Chain Saturated Fatty Acid                         | 0.96 (0.90, 1.04) | 3.31E-01 | 7.15E-01 | LC/MS Neg       | <a href="#">HMDB00827</a> | 5281     | 439       |
| Ascorbic acid 3-sulfate*                          | Cofactors and Vitamins | Ascorbate and Aldarate Metabolism                       | 0.96 (0.89, 1.04) | 3.31E-01 | 7.15E-01 | LC/MS Polar     |                           | 11425365 | 100020409 |
| Glutaryl carnitine (C5-DC)                        | Amino Acid             | Lysine Metabolism                                       | 1.04 (0.96, 1.12) | 3.31E-01 | 7.15E-01 | LC/MS Pos Early | <a href="#">HMDB13130</a> | 71464488 | 100001593 |
| 2-O-Methylascorbic acid                           | Cofactors and Vitamins | Ascorbate and Aldarate Metabolism                       | 1.04 (0.96, 1.13) | 3.32E-01 | 7.15E-01 | LC/MS Neg       |                           | 99779    | 100003258 |
| Mevalonate                                        | Lipid                  | Mevalonate Metabolism                                   | 1.04 (0.96, 1.12) | 3.34E-01 | 7.15E-01 | LC/MS Neg       | <a href="#">HMDB00227</a> | 439230   | 30        |
| 5-Hydroxyhexanoate                                | Lipid                  | Fatty Acid, Monohydroxy                                 | 0.96 (0.90, 1.04) | 3.35E-01 | 7.15E-01 | LC/MS Neg       | <a href="#">HMDB00525</a> | 170748   | 100001148 |
| Theobromine                                       | Xenobiotics            | Xanthine Metabolism                                     | 0.97 (0.90, 1.04) | 3.35E-01 | 7.15E-01 | LC/MS Pos Early | <a href="#">HMDB02825</a> | 5429     | 100000445 |
| Quinolinate                                       | Cofactors and Vitamins | Nicotinate and Nicotinamide Metabolism                  | 1.04 (0.96, 1.12) | 3.38E-01 | 7.21E-01 | LC/MS Pos Early | <a href="#">HMDB00232</a> | 1066     | 182       |
| Imidazole lactate                                 | Amino Acid             | Histidine Metabolism                                    | 1.04 (0.96, 1.13) | 3.41E-01 | 7.23E-01 | LC/MS Pos Early | <a href="#">HMDB02320</a> | 793      | 100000263 |
| 2,3-Dihydroxy-2-methylbutyrate                    | Amino Acid             | Leucine, Isoleucine and Valine Metabolism               | 1.04 (0.96, 1.12) | 3.42E-01 | 7.23E-01 | LC/MS Neg       | <a href="#">HMDB29576</a> | 301941   | 100010869 |
| Phosphate                                         | Energy                 | Oxidative Phosphorylation                               | 0.96 (0.89, 1.04) | 3.44E-01 | 7.23E-01 | LC/MS Pos Early | <a href="#">HMDB01429</a> | 1061     | 461       |
| 3-Hydroxysebacate                                 | Lipid                  | Fatty Acid, Monohydroxy                                 | 0.96 (0.90, 1.04) | 3.44E-01 | 7.23E-01 | LC/MS Neg       | <a href="#">HMDB00350</a> | 3017884  | 100001145 |
| 3-Amino-2-piperidone                              | Amino Acid             | Urea cycle; Arginine and Proline Metabolism             | 0.96 (0.89, 1.04) | 3.44E-01 | 7.23E-01 | LC/MS Pos Early | <a href="#">HMDB00323</a> | 5200225  | 100020361 |
| 3,5-Dichloro-2,6-dihydroxybenzoic acid            | Xenobiotics            | Chemical                                                | 0.96 (0.89, 1.04) | 3.44E-01 | 7.23E-01 | LC/MS Polar     |                           |          | 100021324 |
| Phytanate                                         | Xenobiotics            | Food Component/Plant                                    | 0.97 (0.90, 1.04) | 3.46E-01 | 7.25E-01 | LC/MS Neg       | <a href="#">HMDB00801</a> | 26840    | 466       |
| Oleoylcholine                                     | Lipid                  | Fatty Acid Metabolism (Acyl Choline)                    | 0.97 (0.90, 1.04) | 3.47E-01 | 7.25E-01 | LC/MS Pos Late  |                           |          | 100009331 |
| 3-Ethylcatechol sulfate (1)                       | Xenobiotics            | Food Component/Plant                                    | 1.04 (0.96, 1.11) | 3.48E-01 | 7.25E-01 | LC/MS Neg       |                           |          | 100020851 |
| Eugenol sulfate                                   | Xenobiotics            | Food Component/Plant                                    | 1.03 (0.96, 1.11) | 3.48E-01 | 7.25E-01 | LC/MS Neg       |                           | 180632   | 100006171 |
| 5-Dodecenoylcarnitine (C12:1)                     | Lipid                  | Fatty Acid Metabolism (Acyl Carnitine, Monounsaturated) | 1.04 (0.96, 1.12) | 3.50E-01 | 7.25E-01 | LC/MS Pos Late  | <a href="#">HMDB13326</a> |          | 100016069 |
| Adenine                                           | Nucleotide             | Purine Metabolism, Adenine containing                   | 0.97 (0.90, 1.04) | 3.51E-01 | 7.25E-01 | LC/MS Pos Early | <a href="#">HMDB00034</a> | 190      | 880       |
| Isoursodeoxycholate                               | Lipid                  | Secondary Bile Acid Metabolism                          | 0.97 (0.90, 1.04) | 3.52E-01 | 7.25E-01 | LC/MS Neg       | <a href="#">HMDB00686</a> | 127601   | 100002488 |
| Arabitol/xylitol                                  | Carbohydrate           | Pentose Metabolism                                      | 0.96 (0.89, 1.04) | 3.53E-01 | 7.25E-01 | LC/MS Polar     |                           |          | 100006430 |
| PE (18:0/20:4)                                    | Lipid                  | Phosphatidylethanolamine (PE)                           | 0.97 (0.90, 1.04) | 3.54E-01 | 7.25E-01 | LC/MS Pos Late  | <a href="#">HMDB09003</a> | 5289133  | 100008977 |
| Quinate                                           | Xenobiotics            | Food Component/Plant                                    | 1.04 (0.96, 1.12) | 3.54E-01 | 7.25E-01 | LC/MS Polar     | <a href="#">HMDB03072</a> | 6508     | 100000442 |

|                                               |              |                                                              |                   |          |          |                 |                           |          |           |
|-----------------------------------------------|--------------|--------------------------------------------------------------|-------------------|----------|----------|-----------------|---------------------------|----------|-----------|
| N-Methylpiperolate                            | Xenobiotics  | Bacterial/Fungal                                             | 1.04 (0.96, 1.12) | 3.55E-01 | 7.25E-01 | LC/MS Pos Early |                           | 11286529 | 100005383 |
| 2-Methylcitrate/homocitrate                   | Energy       | TCA Cycle                                                    | 0.97 (0.90, 1.04) | 3.56E-01 | 7.25E-01 | LC/MS Neg       |                           |          | 100008929 |
| Tartronate (hydroxymalonate)                  | Xenobiotics  | Food Component/Plant                                         | 0.97 (0.90, 1.04) | 3.56E-01 | 7.25E-01 | LC/MS Neg       | <a href="#">HMDB35227</a> | 45       | 100000840 |
| Dodecadienoate (12:2)*                        | Lipid        | Fatty Acid, Dicarboxylate                                    | 0.97 (0.90, 1.04) | 3.57E-01 | 7.25E-01 | LC/MS Neg       |                           |          | 100020478 |
| S-1-Pyrroline-5-carboxylate                   | Amino Acid   | Glutamate Metabolism                                         | 0.97 (0.90, 1.04) | 3.57E-01 | 7.25E-01 | LC/MS Pos Early | <a href="#">HMDB01301</a> | 1196     | 35        |
| 1-Dihomo-linolenylglycerol (20:3)             | Lipid        | Monoacylglycerol                                             | 0.97 (0.90, 1.04) | 3.60E-01 | 7.28E-01 | LC/MS Neg       |                           |          | 100006121 |
| 4-Acetylphenol sulfate                        | Xenobiotics  | Benzoate Metabolism                                          | 1.03 (0.96, 1.11) | 3.60E-01 | 7.28E-01 | LC/MS Neg       |                           | 4684006  | 100000711 |
| 3-Phosphoglycerate                            | Carbohydrate | Glycolysis, Gluconeogenesis, and Pyruvate Metabolism         | 0.97 (0.90, 1.04) | 3.64E-01 | 7.32E-01 | LC/MS Pos Early | <a href="#">HMDB00807</a> | 724      | 132       |
| N-Acetyl-β-alanine                            | Nucleotide   | Pyrimidine Metabolism, Uracil containing                     | 1.03 (0.96, 1.11) | 3.64E-01 | 7.32E-01 | LC/MS Neg       |                           | 76406    | 100002102 |
| cis-4-Decenoate (10:1n6)*                     | Lipid        | Medium Chain Fatty Acid                                      | 0.97 (0.90, 1.04) | 3.67E-01 | 7.35E-01 | LC/MS Neg       |                           | 5312351  | 100002796 |
| Thymol sulfate                                | Xenobiotics  | Food Component/Plant                                         | 0.97 (0.90, 1.04) | 3.68E-01 | 7.36E-01 | LC/MS Neg       | <a href="#">HMDB01878</a> |          | 100001757 |
| Tyrosine                                      | Amino Acid   | Tyrosine Metabolism                                          | 0.97 (0.90, 1.04) | 3.71E-01 | 7.38E-01 | LC/MS Pos Early | <a href="#">HMDB00158</a> | 6057     | 815       |
| Palmitoylcarnitine (C16)                      | Lipid        | Fatty Acid Metabolism (Acyl Carnitine, Long Chain Saturated) | 0.97 (0.89, 1.04) | 3.72E-01 | 7.38E-01 | LC/MS Pos Late  | <a href="#">HMDB00222</a> | 461      | 100000776 |
| Taurolithocholate 3-sulfate                   | Lipid        | Secondary Bile Acid Metabolism                               | 0.97 (0.90, 1.04) | 3.72E-01 | 7.38E-01 | LC/MS Neg       | <a href="#">HMDB02580</a> | 440071   | 100001658 |
| 2-Arachidonoylglycerol (20:4)                 | Lipid        | Monoacylglycerol                                             | 1.03 (0.96, 1.12) | 3.73E-01 | 7.38E-01 | LC/MS Neg       | <a href="#">HMDB04666</a> | 5282280  | 100000584 |
| Androsterone glucuronide                      | Lipid        | Androgenic Steroids                                          | 1.04 (0.96, 1.12) | 3.73E-01 | 7.38E-01 | LC/MS Neg       | <a href="#">HMDB02829</a> | 114833   | 100002761 |
| Indolepropionate                              | Amino Acid   | Tryptophan Metabolism                                        | 0.97 (0.90, 1.04) | 3.76E-01 | 7.40E-01 | LC/MS Neg       | <a href="#">HMDB02302</a> | 3744     | 100001083 |
| PC (O-16:0/20:4)*                             | Lipid        | Plasmalogen                                                  | 0.97 (0.90, 1.04) | 3.76E-01 | 7.40E-01 | LC/MS Pos Late  | <a href="#">HMDB11220</a> |          | 100009014 |
| N-Stearoyl-sphingadienine (d18:2/18:0)*       | Lipid        | Ceramides                                                    | 1.03 (0.96, 1.11) | 3.77E-01 | 7.41E-01 | LC/MS Pos Late  |                           |          | 100015632 |
| 2-Hydroxyoctanoate                            | Lipid        | Fatty Acid, Monohydroxy                                      | 0.97 (0.89, 1.04) | 3.79E-01 | 7.41E-01 | LC/MS Neg       | <a href="#">HMDB02264</a> | 94180    | 100000743 |
| PC (16:0/22:6)                                | Lipid        | Phosphatidylcholine (PC)                                     | 0.97 (0.90, 1.04) | 3.80E-01 | 7.41E-01 | LC/MS Pos Late  | <a href="#">HMDB07991</a> | 6441886  | 100008915 |
| Sulfate of piperine metabolite C16H19NO3 (3)* | Xenobiotics  | Food Component/Plant                                         | 1.03 (0.96, 1.11) | 3.81E-01 | 7.41E-01 | LC/MS Neg       |                           |          | 100020497 |
| Phenylalanine                                 | Amino Acid   | Phenylalanine Metabolism                                     | 0.97 (0.90, 1.04) | 3.81E-01 | 7.41E-01 | LC/MS Pos Early | <a href="#">HMDB00159</a> | 6140     | 460       |
| fructosyllysine                               | Amino Acid   | Lysine Metabolism                                            | 0.97 (0.90, 1.04) | 3.82E-01 | 7.41E-01 | LC/MS Pos Early |                           | 123708   | 100005373 |
| Dodecanedioate (C12-DC)                       | Lipid        | Fatty Acid, Dicarboxylate                                    | 0.97 (0.90, 1.04) | 3.82E-01 | 7.41E-01 | LC/MS Neg       | <a href="#">HMDB00623</a> | 12736    | 100001102 |
| N,N,N-Trimethyl-5-aminovalerate               | Amino Acid   | Lysine Metabolism                                            | 0.97 (0.89, 1.05) | 3.84E-01 | 7.41E-01 | LC/MS Pos Early |                           | 14274897 | 100015962 |
| DihydroSM (d18:0/14:0)*                       | Lipid        | Dihydrosphingomyelins                                        | 0.97 (0.90, 1.04) | 3.85E-01 | 7.41E-01 | LC/MS Pos Late  | <a href="#">HMDB12085</a> |          | 100009038 |
| S-Allylcysteine                               | Xenobiotics  | Food Component/Plant                                         | 0.97 (0.90, 1.04) | 3.86E-01 | 7.41E-01 | LC/MS Pos Early | <a href="#">HMDB34323</a> | 98280    | 100004509 |
| 3-Decenoylcarnitine                           | Lipid        | Fatty Acid Metabolism (Acyl Carnitine, Monounsaturated)      | 0.97 (0.90, 1.04) | 3.86E-01 | 7.41E-01 | LC/MS Pos Late  |                           |          | 100021136 |
| C-Glycosyltryptophan                          | Amino Acid   | Tryptophan Metabolism                                        | 1.04 (0.96, 1.12) | 3.87E-01 | 7.41E-01 | LC/MS Neg       |                           | 10981970 | 100006379 |
| 5-Hydroxylysine                               | Amino Acid   | Lysine Metabolism                                            | 1.03 (0.96, 1.12) | 3.89E-01 | 7.44E-01 | LC/MS Pos Early | <a href="#">HMDB00450</a> | 1029     | 100000054 |
| N-Stearoyl-sphingosine (d18:1/18:0)*          | Lipid        | Ceramides                                                    | 1.03 (0.96, 1.12) | 3.92E-01 | 7.47E-01 | LC/MS Pos Late  | <a href="#">HMDB04950</a> | 5283565  | 1547      |
| Oleate/vaccenate (18:1)                       | Lipid        | Long Chain Monounsaturated Fatty Acid                        | 0.97 (0.90, 1.04) | 3.93E-01 | 7.48E-01 | LC/MS Neg       |                           |          | 100008930 |

|                                                   |                        |                                                      |                   |          |          |                 |                           |          |           |
|---------------------------------------------------|------------------------|------------------------------------------------------|-------------------|----------|----------|-----------------|---------------------------|----------|-----------|
| Glucuronide of piperine metabolite C17H21NO3 (3)* | Xenobiotics            | Food Component/Plant                                 | 1.03 (0.96, 1.11) | 3.96E-01 | 7.50E-01 | LC/MS Neg       |                           |          | 100020491 |
| 1-Carboxyethylleucine                             | Amino Acid             | Leucine, Isoleucine and Valine Metabolism            | 1.03 (0.96, 1.12) | 3.97E-01 | 7.50E-01 | LC/MS Neg       |                           |          | 100020425 |
| Caprylate (8:0)                                   | Lipid                  | Medium Chain Fatty Acid                              | 1.03 (0.96, 1.11) | 3.97E-01 | 7.50E-01 | LC/MS Neg       | <a href="#">HMDB00482</a> | 379      | 932       |
| Pregnanediol-3-glucuronide                        | Lipid                  | Progestin Steroids                                   | 1.04 (0.95, 1.13) | 3.98E-01 | 7.50E-01 | LC/MS Neg       | <a href="#">HMDB10318</a> | 123796   | 100003470 |
| Acetylcarnitine (C2)                              | Lipid                  | Fatty Acid Metabolism (Acyl Carnitine, Short Chain)  | 0.97 (0.90, 1.04) | 4.02E-01 | 7.56E-01 | LC/MS Pos Early | <a href="#">HMDB00201</a> | 1        | 100000802 |
| 5α-Pregnan-3β,20α-diol monosulfate (2)            | Lipid                  | Progestin Steroids                                   | 1.04 (0.95, 1.13) | 4.02E-01 | 7.56E-01 | LC/MS Neg       |                           |          | 100002014 |
| 4-Methyl-2-oxopentanoate                          | Amino Acid             | Leucine, Isoleucine and Valine Metabolism            | 0.97 (0.90, 1.04) | 4.05E-01 | 7.59E-01 | LC/MS Neg       | <a href="#">HMDB00695</a> | 70       | 100000551 |
| LysoPI (20:4)*                                    | Lipid                  | Lysophospholipid                                     | 0.97 (0.90, 1.04) | 4.08E-01 | 7.61E-01 | LC/MS Neg       | <a href="#">HMDB61690</a> |          | 100001654 |
| 3-Methylxanthine                                  | Xenobiotics            | Xanthine Metabolism                                  | 0.97 (0.90, 1.04) | 4.08E-01 | 7.61E-01 | LC/MS Neg       | <a href="#">HMDB01886</a> | 70639    | 100001108 |
| N2-Acetyl,N6,N6-dimethyllysine                    | Amino Acid             | Lysine Metabolism                                    | 1.03 (0.96, 1.11) | 4.10E-01 | 7.61E-01 | LC/MS Pos Early |                           |          | 100020545 |
| α-Hydroxyisovalerate                              | Amino Acid             | Leucine, Isoleucine and Valine Metabolism            | 0.97 (0.89, 1.05) | 4.10E-01 | 7.61E-01 | LC/MS Neg       | HMDB00407                 | 99823    | 100001300 |
| Glycodeoxycholate glucuronide (1)                 | Lipid                  | Secondary Bile Acid Metabolism                       | 0.97 (0.90, 1.05) | 4.10E-01 | 7.61E-01 | LC/MS Polar     |                           |          | 100009266 |
| Palmitoylcholine                                  | Lipid                  | Fatty Acid Metabolism (Acyl Choline)                 | 0.97 (0.90, 1.04) | 4.12E-01 | 7.63E-01 | LC/MS Pos Late  |                           | 151731   | 100009233 |
| Aspartate                                         | Amino Acid             | Alanine and Aspartate Metabolism                     | 0.97 (0.91, 1.04) | 4.14E-01 | 7.64E-01 | LC/MS Pos Early | <a href="#">HMDB00191</a> | 5960     | 234       |
| Inosine                                           | Nucleotide             | Purine Metabolism, (Hypo)Xanthine/Inosine containing | 1.03 (0.96, 1.11) | 4.17E-01 | 7.64E-01 | LC/MS Neg       | <a href="#">HMDB00195</a> | 6021     | 361       |
| Palmitoyl-linoleoyl-glycerol (16:0/18:2) [2]*     | Lipid                  | Diacylglycerol                                       | 1.03 (0.96, 1.11) | 4.18E-01 | 7.64E-01 | LC/MS Pos Late  |                           |          | 100009055 |
| Adrenate (22:4n6)                                 | Lipid                  | Long Chain Polyunsaturated Fatty Acid (n3 and n6)    | 1.03 (0.96, 1.11) | 4.18E-01 | 7.64E-01 | LC/MS Neg       | <a href="#">HMDB02226</a> | 5497181  | 100001193 |
| Ceramide (d18:1/17:0, d17:1/18:0)*                | Lipid                  | Ceramides                                            | 1.03 (0.96, 1.11) | 4.18E-01 | 7.64E-01 | LC/MS Pos Late  |                           |          | 100015737 |
| 1-Linoleoylglycerol (18:2)                        | Lipid                  | Monoacylglycerol                                     | 0.97 (0.90, 1.04) | 4.19E-01 | 7.64E-01 | LC/MS Neg       |                           | 5283469  | 100001040 |
| tetradecadienoate (14:2)*                         | Lipid                  | Long Chain Polyunsaturated Fatty Acid (n3 and n6)    | 0.97 (0.90, 1.04) | 4.19E-01 | 7.64E-01 | LC/MS Neg       | <a href="#">HMDB00560</a> | 5312409  | 100020343 |
| N-Acetyl-3-methylhistidine*                       | Amino Acid             | Histidine Metabolism                                 | 0.97 (0.90, 1.04) | 4.21E-01 | 7.65E-01 | LC/MS Neg       |                           | 193270   | 100002204 |
| N,N,N-Trimethyl-alanylproline betaine (TMAP)      | Amino Acid             | Urea cycle; Arginine and Proline Metabolism          | 0.97 (0.90, 1.05) | 4.22E-01 | 7.65E-01 | LC/MS Pos Early |                           |          | 100020217 |
| Dihydroxyacetone phosphate (DHAP)                 | Carbohydrate           | Glycolysis, Gluconeogenesis, and Pyruvate Metabolism | 0.97 (0.90, 1.05) | 4.22E-01 | 7.65E-01 | LC/MS Pos Early | <a href="#">HMDB01473</a> | 668      | 309       |
| PC (16:0/20:4n6)                                  | Lipid                  | Phosphatidylcholine (PC)                             | 0.97 (0.90, 1.05) | 4.24E-01 | 7.66E-01 | LC/MS Pos Late  | <a href="#">HMDB07982</a> | 10747814 | 100008914 |
| Retinol (Vitamin A)                               | Cofactors and Vitamins | Vitamin A Metabolism                                 | 0.97 (0.89, 1.05) | 4.27E-01 | 7.71E-01 | LC/MS Pos Late  | <a href="#">HMDB00305</a> | 445354   | 498       |
| Chiro-inositol                                    | Lipid                  | Inositol Metabolism                                  | 0.97 (0.90, 1.05) | 4.28E-01 | 7.71E-01 | LC/MS Polar     | <a href="#">HMDB34220</a> |          | 100001859 |
| Serotonin                                         | Amino Acid             | Tryptophan Metabolism                                | 0.97 (0.90, 1.05) | 4.31E-01 | 7.74E-01 | LC/MS Pos Early | <a href="#">HMDB00259</a> | 5202     | 504       |
| Xanthurenate                                      | Amino Acid             | Tryptophan Metabolism                                | 1.03 (0.96, 1.11) | 4.33E-01 | 7.76E-01 | LC/MS Pos Early | <a href="#">HMDB00881</a> | 5699     | 100000015 |
| Deoxycholic acid glucuronide                      | Lipid                  | Secondary Bile Acid Metabolism                       | 0.97 (0.90, 1.04) | 4.34E-01 | 7.76E-01 | LC/MS Neg       |                           |          | 100020550 |
| Bilirubin (E,Z or Z,E)*                           | Cofactors and Vitamins | Hemoglobin and Porphyrin Metabolism                  | 0.97 (0.90, 1.05) | 4.36E-01 | 7.76E-01 | LC/MS Pos Late  | <a href="#">HMDB00488</a> | 5799469  | 100001951 |
| 2-Acetamidophenol sulfate                         | Xenobiotics            | Food Component/Plant                                 | 0.97 (0.90, 1.05) | 4.36E-01 | 7.76E-01 | LC/MS Neg       |                           | 181671   | 100006190 |



|                                                  |              |                                                         |                   |          |          |                 |                             |               |           |
|--------------------------------------------------|--------------|---------------------------------------------------------|-------------------|----------|----------|-----------------|-----------------------------|---------------|-----------|
| N-Acetyl-isoputrescine                           | Amino Acid   | Polyamine Metabolism                                    | 0.97 (0.90, 1.05) | 4.37E-01 | 7.76E-01 | LC/MS Pos Early |                             | 13180290<br>1 | 100020487 |
| 3-(4-Hydroxyphenyl)lactate                       | Amino Acid   | Tyrosine Metabolism                                     | 1.03 (0.95, 1.11) | 4.39E-01 | 7.79E-01 | LC/MS Neg       | <a href="#">HMDB00755</a>   | 9378          | 240       |
| Perfluorooctanesulfonate (PFOS)                  | Xenobiotics  | Chemical                                                | 0.97 (0.90, 1.05) | 4.40E-01 | 7.80E-01 | LC/MS Polar     | <a href="#">HMDB59586</a>   | 74483         | 100010955 |
| β-Alanine                                        | Nucleotide   | Pyrimidine Metabolism, Uracil containing                | 1.03 (0.96, 1.11) | 4.42E-01 | 7.82E-01 | LC/MS Pos Early | <a href="#">HMDB00056</a>   | 239           | 244       |
| Picolinoylglycine                                | Lipid        | Fatty Acid Metabolism (Acyl Glycine)                    | 1.03 (0.95, 1.11) | 4.45E-01 | 7.83E-01 | LC/MS Pos Early | <a href="#">HMDB59766</a>   | 11788622      | 100021198 |
| 2-Hydroxyglutarate                               | Lipid        | Fatty Acid, Dicarboxylate                               | 0.97 (0.90, 1.05) | 4.46E-01 | 7.83E-01 | LC/MS Pos Early | <a href="#">HMDB0059655</a> | 43            | 100002070 |
| Carnitine                                        | Lipid        | Carnitine Metabolism                                    | 0.97 (0.90, 1.05) | 4.46E-01 | 7.83E-01 | LC/MS Pos Early | <a href="#">HMDB00062</a>   | 10917         | 100000007 |
| 5-Acetylamino-6-amino-3-methyluracil             | Xenobiotics  | Xanthine Metabolism                                     | 0.97 (0.90, 1.05) | 4.47E-01 | 7.83E-01 | LC/MS Polar     | <a href="#">HMDB04400</a>   | 88299         | 100001403 |
| Catechol sulfate                                 | Xenobiotics  | Benzoate Metabolism                                     | 1.03 (0.95, 1.11) | 4.47E-01 | 7.83E-01 | LC/MS Neg       | <a href="#">HMDB59724</a>   | 3083879       | 100001605 |
| Glycodeoxycholate 3-sulfate                      | Lipid        | Secondary Bile Acid Metabolism                          | 0.97 (0.90, 1.05) | 4.50E-01 | 7.87E-01 | LC/MS Neg       |                             |               | 100006642 |
| Isobutyrylglycine                                | Amino Acid   | Leucine, Isoleucine and Valine Metabolism               | 0.97 (0.90, 1.05) | 4.55E-01 | 7.89E-01 | LC/MS Neg       | <a href="#">HMDB00730</a>   | 10855600      | 100001590 |
| Phenyllactate (PLA)                              | Amino Acid   | Phenylalanine Metabolism                                | 0.97 (0.90, 1.05) | 4.57E-01 | 7.89E-01 | LC/MS Neg       | <a href="#">HMDB00779</a>   | 3848          | 100000774 |
| Choline                                          | Lipid        | Phospholipid Metabolism                                 | 0.97 (0.90, 1.05) | 4.57E-01 | 7.89E-01 | LC/MS Pos Early | <a href="#">HMDB00097</a>   | 305           | 1256      |
| LysoPI (18:0)                                    | Lipid        | Lysophospholipid                                        | 0.97 (0.90, 1.05) | 4.57E-01 | 7.89E-01 | LC/MS Neg       | <a href="#">HMDB61696</a>   |               | 100000656 |
| Ximenoylcarnitine (C26:1)*                       | Lipid        | Fatty Acid Metabolism (Acyl Carnitine, Monounsaturated) | 0.97 (0.90, 1.05) | 4.57E-01 | 7.89E-01 | LC/MS Pos Late  |                             |               | 100015836 |
| Fructose                                         | Carbohydrate | Fructose, Mannose and Galactose Metabolism              | 0.97 (0.90, 1.05) | 4.57E-01 | 7.89E-01 | LC/MS Polar     | <a href="#">HMDB00660</a>   | 5984          | 878       |
| Dopamine 4-sulfate                               | Amino Acid   | Tyrosine Metabolism                                     | 0.97 (0.90, 1.05) | 4.61E-01 | 7.92E-01 | LC/MS Neg       | <a href="#">HMDB04148</a>   | 123932        | 100006360 |
| Xanthine                                         | Nucleotide   | Purine Metabolism, (Hypo)Xanthine/Inosine containing    | 1.03 (0.95, 1.11) | 4.61E-01 | 7.92E-01 | LC/MS Polar     | <a href="#">HMDB00292</a>   | 1188          | 1004      |
| 4-Allylcatechol sulfate                          | Xenobiotics  | Benzoate Metabolism                                     | 1.03 (0.96, 1.11) | 4.63E-01 | 7.92E-01 | LC/MS Neg       |                             |               | 100020578 |
| Isobutyrylcarnitine (C4)                         | Amino Acid   | Leucine, Isoleucine and Valine Metabolism               | 0.97 (0.90, 1.05) | 4.64E-01 | 7.92E-01 | LC/MS Pos Early | <a href="#">HMDB00736</a>   | 168379        | 100001055 |
| 2-Aminobutyrate                                  | Amino Acid   | Glutathione Metabolism                                  | 0.97 (0.90, 1.05) | 4.64E-01 | 7.92E-01 | LC/MS Pos Early | <a href="#">HMDB00650</a>   | 439691        | 1128      |
| 3-(4-Hydroxyphenyl)propionate                    | Xenobiotics  | Benzoate Metabolism                                     | 0.97 (0.91, 1.05) | 4.66E-01 | 7.92E-01 | LC/MS Neg       | <a href="#">HMDB02199</a>   | 10394         | 100002914 |
| Isoleucylglycine                                 | Peptide      | Dipeptide                                               | 0.97 (0.90, 1.05) | 4.66E-01 | 7.92E-01 | LC/MS Neg       | <a href="#">HMDB28907</a>   | 342532        | 100003169 |
| Taurochenodeoxycholic acid 3-sulfate             | Lipid        | Secondary Bile Acid Metabolism                          | 1.03 (0.95, 1.12) | 4.66E-01 | 7.92E-01 | LC/MS Neg       | <a href="#">HMDB02486</a>   |               | 100021093 |
| Cysteinylglycine                                 | Amino Acid   | Glutathione Metabolism                                  | 1.03 (0.95, 1.11) | 4.67E-01 | 7.92E-01 | LC/MS Pos Early | <a href="#">HMDB00078</a>   | 439498        | 278       |
| (16 or 17)-Methylstearate (a19:0 or i19:0)       | Lipid        | Fatty Acid, Branched                                    | 0.97 (0.91, 1.05) | 4.69E-01 | 7.93E-01 | LC/MS Neg       | <a href="#">HMDB37397</a>   | 3083779       | 100002356 |
| 4-Acetamidobutanoate                             | Amino Acid   | Polyamine Metabolism                                    | 0.97 (0.89, 1.05) | 4.70E-01 | 7.93E-01 | LC/MS Pos Early | <a href="#">HMDB03681</a>   | 18189         | 1113      |
| Mannitol/sorbitol                                | Carbohydrate | Fructose, Mannose and Galactose Metabolism              | 0.97 (0.90, 1.05) | 4.71E-01 | 7.95E-01 | LC/MS Polar     | <a href="#">HMDB00247</a>   | 5780          | 100001740 |
| Hexanoylcarnitine (C6)                           | Lipid        | Fatty Acid Metabolism (Acyl Carnitine, Medium Chain)    | 1.03 (0.95, 1.11) | 4.79E-01 | 8.05E-01 | LC/MS Pos Early | <a href="#">HMDB00705</a>   | 6426853       | 100000781 |
| 2,3-Dihydroxy-5-methylthio-4-pentenoate (DMTPA)* | Amino Acid   | Methionine, Cysteine, SAM and Taurine Metabolism        | 1.03 (0.95, 1.12) | 4.79E-01 | 8.05E-01 | LC/MS Neg       |                             |               | 100020893 |
| 3-Methylglutaconate                              | Amino Acid   | Leucine, Isoleucine and Valine Metabolism               | 0.97 (0.90, 1.05) | 4.82E-01 | 8.06E-01 | LC/MS Polar     | <a href="#">HMDB00522</a>   | 1551553       | 100002458 |

|                                          |                        |                                                  |                   |          |          |                 |                           |          |           |
|------------------------------------------|------------------------|--------------------------------------------------|-------------------|----------|----------|-----------------|---------------------------|----------|-----------|
| Uracil                                   | Nucleotide             | Pyrimidine Metabolism, Uracil containing         | 0.97 (0.91, 1.05) | 4.82E-01 | 8.06E-01 | LC/MS Polar     | <a href="#">HMDB00300</a> | 1174     | 825       |
| Ursodeoxycholate                         | Lipid                  | Secondary Bile Acid Metabolism                   | 0.97 (0.91, 1.05) | 4.83E-01 | 8.06E-01 | LC/MS Neg       | <a href="#">HMDB00946</a> | 31401    | 1135      |
| Estrone 3-sulfate                        | Lipid                  | Estrogenic Steroids                              | 1.03 (0.95, 1.12) | 4.85E-01 | 8.07E-01 | LC/MS Neg       | <a href="#">HMDB01425</a> | 3001028  | 1230      |
| N-Palmitoylglycine                       | Lipid                  | Fatty Acid Metabolism (Acyl Glycine)             | 0.97 (0.90, 1.05) | 4.87E-01 | 8.07E-01 | LC/MS Neg       | <a href="#">HMDB13034</a> | 151008   | 100003686 |
| Cystathionine                            | Amino Acid             | Methionine, Cysteine, SAM and Taurine Metabolism | 1.03 (0.95, 1.11) | 4.87E-01 | 8.07E-01 | LC/MS Pos Early | <a href="#">HMDB00099</a> | 439258   | 310       |
| 3-Methyl-2-oxobutyrate                   | Amino Acid             | Leucine, Isoleucine and Valine Metabolism        | 0.97 (0.90, 1.05) | 4.88E-01 | 8.07E-01 | LC/MS Neg       | <a href="#">HMDB00019</a> | 49       | 100000936 |
| 2-Hydroxyphenylacetate                   | Amino Acid             | Phenylalanine Metabolism                         | 1.03 (0.95, 1.11) | 4.88E-01 | 8.07E-01 | LC/MS Polar     | <a href="#">HMDB00669</a> | 11970    | 235       |
| LysoPI (16:0)                            | Lipid                  | Lysophospholipid                                 | 0.97 (0.90, 1.05) | 4.91E-01 | 8.11E-01 | LC/MS Neg       | <a href="#">HMDB61695</a> |          | 100001655 |
| PE (16:0/18:1)                           | Lipid                  | Phosphatidylethanolamine (PE)                    | 0.97 (0.90, 1.05) | 4.94E-01 | 8.13E-01 | LC/MS Pos Late  | <a href="#">HMDB05320</a> | 5283496  | 1526      |
| Pyridoxate                               | Cofactors and Vitamins | Vitamin B6 Metabolism                            | 0.97 (0.90, 1.05) | 4.97E-01 | 8.13E-01 | LC/MS Neg       | <a href="#">HMDB00017</a> | 6723     | 100001121 |
| SM (d18:1/20:2, d18:2/20:1, d16:1/22:2)* | Lipid                  | Sphingomyelins                                   | 0.97 (0.90, 1.05) | 4.97E-01 | 8.13E-01 | LC/MS Pos Late  |                           |          | 100006293 |
| 3-Hydroxyoctanoate                       | Lipid                  | Fatty Acid, Monohydroxy                          | 0.97 (0.91, 1.05) | 5.01E-01 | 8.13E-01 | LC/MS Neg       | <a href="#">HMDB01954</a> | 26613    | 100000773 |
| 10-Nonadecenoate (19:1n9)                | Lipid                  | Long Chain Monounsaturated Fatty Acid            | 0.98 (0.91, 1.05) | 5.01E-01 | 8.13E-01 | LC/MS Neg       | <a href="#">HMDB13622</a> | 5312513  | 100001277 |
| Ceramide (d18:1/14:0, d16:1/16:0)*       | Lipid                  | Ceramides                                        | 1.02 (0.95, 1.10) | 5.01E-01 | 8.13E-01 | LC/MS Pos Late  |                           |          | 100015735 |
| Pantoate                                 | Cofactors and Vitamins | Pantothenate and CoA Metabolism                  | 0.97 (0.90, 1.05) | 5.02E-01 | 8.13E-01 | LC/MS Neg       |                           | 439251   | 100002613 |
| Hexanoylglutamine                        | Lipid                  | Fatty Acid Metabolism (Acyl Glutamine)           | 0.97 (0.90, 1.05) | 5.03E-01 | 8.13E-01 | LC/MS Neg       |                           |          | 100001733 |
| PE (16:0/20:4)*                          | Lipid                  | Phosphatidylethanolamine (PE)                    | 0.97 (0.90, 1.05) | 5.03E-01 | 8.13E-01 | LC/MS Pos Late  | <a href="#">HMDB05323</a> | 9546800  | 100008990 |
| Carboxybuprofen                          | Xenobiotics            | Drug - Analgesics, Anesthetics                   | 0.97 (0.90, 1.05) | 5.04E-01 | 8.13E-01 | LC/MS Neg       | <a href="#">HMDB60564</a> | 10444113 | 100004171 |
| Eicosenoate (20:1)                       | Lipid                  | Long Chain Monounsaturated Fatty Acid            | 0.98 (0.91, 1.05) | 5.05E-01 | 8.13E-01 | LC/MS Neg       | <a href="#">HMDB02231</a> | 5282768  | 100001335 |
| 2R,3R-Dihydroxybutyrate                  | Lipid                  | Fatty Acid, Dihydroxy                            | 1.03 (0.95, 1.11) | 5.06E-01 | 8.13E-01 | LC/MS Polar     | <a href="#">HMDB00498</a> | 13120901 | 100002367 |
| Mannose                                  | Carbohydrate           | Fructose, Mannose and Galactose Metabolism       | 1.03 (0.95, 1.11) | 5.06E-01 | 8.13E-01 | LC/MS Polar     | <a href="#">HMDB00169</a> | 18950    | 803       |
| LysoPC (16:1)*                           | Lipid                  | Lysophospholipid                                 | 0.97 (0.90, 1.05) | 5.06E-01 | 8.13E-01 | LC/MS Pos Late  | <a href="#">HMDB10383</a> | 24779461 | 100001511 |
| Arachidonoylcholine                      | Lipid                  | Fatty Acid Metabolism (Acyl Choline)             | 0.98 (0.91, 1.05) | 5.07E-01 | 8.13E-01 | LC/MS Pos Late  |                           |          | 100009332 |
| Tetradecanedioate (C14-DC)               | Lipid                  | Fatty Acid, Dicarboxylate                        | 0.98 (0.91, 1.05) | 5.09E-01 | 8.13E-01 | LC/MS Neg       | <a href="#">HMDB00872</a> | 13185    | 100001613 |
| Ethyl maltol sulfate                     | Xenobiotics            | Food Component/Plant                             | 1.03 (0.95, 1.10) | 5.10E-01 | 8.13E-01 | LC/MS Neg       |                           |          | 100006255 |
| 9-Hydroxystearate                        | Lipid                  | Fatty Acid, Monohydroxy                          | 0.98 (0.91, 1.05) | 5.10E-01 | 8.13E-01 | LC/MS Neg       | <a href="#">HMDB61661</a> | 9570127  | 100005834 |
| Trimethylamine N-oxide                   | Lipid                  | Phospholipid Metabolism                          | 0.97 (0.90, 1.05) | 5.10E-01 | 8.13E-01 | LC/MS Pos Early | <a href="#">HMDB00925</a> | 1145     | 100003397 |
| Homoarginine                             | Amino Acid             | Urea cycle; Arginine and Proline Metabolism      | 1.03 (0.95, 1.11) | 5.12E-01 | 8.14E-01 | LC/MS Pos Early | <a href="#">HMDB00670</a> | 9085     | 100000961 |
| PE (16:0/22:6)*                          | Lipid                  | Phosphatidylethanolamine (PE)                    | 0.97 (0.90, 1.05) | 5.14E-01 | 8.15E-01 | LC/MS Pos Late  | <a href="#">HMDB05324</a> | 9546799  | 100008991 |
| Pyroglutamine*                           | Amino Acid             | Glutamate Metabolism                             | 0.98 (0.90, 1.05) | 5.17E-01 | 8.17E-01 | LC/MS Pos Early |                           |          | 100001540 |
| (2 or 3)-Decenoate (10:1n7 or n8)        | Lipid                  | Medium Chain Fatty Acid                          | 0.98 (0.91, 1.05) | 5.17E-01 | 8.17E-01 | LC/MS Neg       |                           |          | 100021502 |
| Succinylcarnitine (C4-DC)                | Energy                 | TCA Cycle                                        | 1.03 (0.95, 1.11) | 5.18E-01 | 8.17E-01 | LC/MS Pos Early | <a href="#">HMDB61717</a> | 71464481 | 100001948 |

|                                                    |                        |                                                       |                   |          |          |                 |                           |          |           |
|----------------------------------------------------|------------------------|-------------------------------------------------------|-------------------|----------|----------|-----------------|---------------------------|----------|-----------|
| Glucuronide of piperine metabolite C17H21NO3 (4)*  | Xenobiotics            | Food Component/Plant                                  | 1.02 (0.95, 1.10) | 5.21E-01 | 8.20E-01 | LC/MS Neg       |                           |          | 100020492 |
| Glucuronate                                        | Carbohydrate           | Aminosugar Metabolism                                 | 0.98 (0.91, 1.05) | 5.22E-01 | 8.20E-01 | LC/MS Polar     | <a href="#">HMDB00127</a> | 444791   | 100000257 |
| 2-Aminophenol sulfate                              | Xenobiotics            | Food Component/Plant                                  | 0.98 (0.91, 1.05) | 5.22E-01 | 8.20E-01 | LC/MS Neg       | <a href="#">HMDB61116</a> | 181670   | 100004322 |
| Stearidonate (18:4n3)                              | Lipid                  | Long Chain Polyunsaturated Fatty Acid (n3 and n6)     | 0.98 (0.91, 1.05) | 5.23E-01 | 8.20E-01 | LC/MS Neg       | <a href="#">HMDB06547</a> | 5312508  | 100001229 |
| Glycochenodeoxycholate glucuronide (1)             | Lipid                  | Primary Bile Acid Metabolism                          | 0.98 (0.90, 1.05) | 5.26E-01 | 8.21E-01 | LC/MS Neg       |                           |          | 100009264 |
| Trans-4-hydroxyproline                             | Amino Acid             | Urea cycle; Arginine and Proline Metabolism           | 0.98 (0.90, 1.05) | 5.27E-01 | 8.21E-01 | LC/MS Pos Early | <a href="#">HMDB00725</a> | 5810     | 1001      |
| Taurodeoxycholic acid 3-sulfate                    | Lipid                  | Secondary Bile Acid Metabolism                        | 0.98 (0.90, 1.05) | 5.27E-01 | 8.21E-01 | LC/MS Neg       |                           |          | 100006644 |
| Tartarate                                          | Xenobiotics            | Food Component/Plant                                  | 0.98 (0.91, 1.05) | 5.31E-01 | 8.25E-01 | LC/MS Neg       | <a href="#">HMDB00956</a> | 444305   | 100000295 |
| Dimethylglycine                                    | Amino Acid             | Glycine, Serine and Threonine Metabolism              | 1.02 (0.95, 1.10) | 5.31E-01 | 8.25E-01 | LC/MS Pos Early | <a href="#">HMDB00092</a> | 673      | 806       |
| Dihydroferulate                                    | Xenobiotics            | Food Component/Plant                                  | 0.98 (0.90, 1.05) | 5.32E-01 | 8.25E-01 | LC/MS Neg       |                           | 14340    | 100003432 |
| 2-Linoleoylglycerol (18:2)                         | Lipid                  | Monoacylglycerol                                      | 0.98 (0.91, 1.05) | 5.33E-01 | 8.25E-01 | LC/MS Neg       | <a href="#">HMDB11538</a> | 5365676  | 100000987 |
| Pantothenate                                       | Cofactors and Vitamins | Pantothenate and CoA Metabolism                       | 0.98 (0.90, 1.06) | 5.35E-01 | 8.25E-01 | LC/MS Neg       | <a href="#">HMDB00210</a> | 6613     | 1024      |
| Margarate (17:0)                                   | Lipid                  | Long Chain Saturated Fatty Acid                       | 0.98 (0.91, 1.05) | 5.36E-01 | 8.25E-01 | LC/MS Neg       | <a href="#">HMDB02259</a> | 10465    | 891       |
| Carotene diol (3)                                  | Cofactors and Vitamins | Vitamin A Metabolism                                  | 0.98 (0.91, 1.05) | 5.36E-01 | 8.25E-01 | LC/MS Pos Late  |                           |          | 100015968 |
| Dihydrocaffeate sulfate (2)                        | Xenobiotics            | Food Component/Plant                                  | 1.02 (0.95, 1.10) | 5.37E-01 | 8.25E-01 | LC/MS Neg       |                           |          | 100020822 |
| Etiocholanolone glucuronide                        | Lipid                  | Androgenic Steroids                                   | 1.02 (0.95, 1.10) | 5.39E-01 | 8.27E-01 | LC/MS Neg       | <a href="#">HMDB04484</a> | 270605   | 100005403 |
| Docosapentaenoate (n3 DPA; 22:5n3)                 | Lipid                  | Long Chain Polyunsaturated Fatty Acid (n3 and n6)     | 0.98 (0.91, 1.05) | 5.40E-01 | 8.27E-01 | LC/MS Neg       | <a href="#">HMDB06528</a> | 6441454  | 100001181 |
| Creatine                                           | Amino Acid             | Creatine Metabolism                                   | 0.98 (0.91, 1.05) | 5.42E-01 | 8.27E-01 | LC/MS Neg       | <a href="#">HMDB00064</a> | 586      | 1221      |
| α-CEHC                                             | Cofactors and Vitamins | Tocopherol Metabolism                                 | 1.02 (0.95, 1.10) | 5.43E-01 | 8.27E-01 | LC/MS Neg       | <a href="#">HMDB01518</a> | 9943542  | 100002206 |
| Docosahexaenoylcholine                             | Lipid                  | Fatty Acid Metabolism (Acyl Choline)                  | 0.98 (0.91, 1.05) | 5.43E-01 | 8.27E-01 | LC/MS Pos Late  |                           |          | 100009333 |
| N-Acetylproline                                    | Amino Acid             | Urea cycle; Arginine and Proline Metabolism           | 0.98 (0.91, 1.05) | 5.46E-01 | 8.30E-01 | LC/MS Pos Early |                           | 322640   | 100001334 |
| N-Formylmethionine                                 | Amino Acid             | Methionine, Cysteine, SAM and Taurine Metabolism      | 0.98 (0.90, 1.06) | 5.47E-01 | 8.30E-01 | LC/MS Neg       | <a href="#">HMDB01015</a> | 439750   | 194       |
| Lactosyl-N-palmitoyl-sphingosine (d18:1/16:0)      | Lipid                  | Lactosylceramides (LCER)                              | 0.98 (0.91, 1.05) | 5.48E-01 | 8.31E-01 | LC/MS Pos Late  |                           |          | 100009030 |
| Methylsuccinoylcarnitine                           | Amino Acid             | Leucine, Isoleucine and Valine Metabolism             | 0.98 (0.90, 1.06) | 5.50E-01 | 8.32E-01 | LC/MS Pos Early |                           |          | 100009275 |
| PS (18:0/18:1)                                     | Lipid                  | Phosphatidylserine (PS)                               | 0.98 (0.91, 1.05) | 5.53E-01 | 8.33E-01 | LC/MS Pos Late  | <a href="#">HMDB10163</a> | 9547087  | 100000639 |
| δ-CEHC                                             | Cofactors and Vitamins | Tocopherol Metabolism                                 | 0.98 (0.91, 1.05) | 5.53E-01 | 8.33E-01 | LC/MS Neg       |                           | 11536125 | 100020416 |
| Triclosan sulfate                                  | Xenobiotics            | Drug - Antibiotic                                     | 0.98 (0.91, 1.05) | 5.55E-01 | 8.34E-01 | LC/MS Neg       | <a href="#">HMDB61387</a> |          | 100020610 |
| PE (18:0/22:6)*                                    | Lipid                  | Phosphatidylethanolamine (PE)                         | 1.02 (0.95, 1.10) | 5.57E-01 | 8.37E-01 | LC/MS Pos Late  | <a href="#">HMDB05334</a> | 9546798  | 100008992 |
| 2-Methoxyhydroquinone sulfate (1)                  | Xenobiotics            | Benzoate Metabolism                                   | 0.98 (0.91, 1.05) | 5.62E-01 | 8.42E-01 | LC/MS Neg       |                           |          | 100021839 |
| Pimeloylcarnitine/3-methyladipoylcarnitine (C7-DC) | Lipid                  | Fatty Acid Metabolism (Acyl Carnitine, Dicarboxylate) | 0.98 (0.91, 1.05) | 5.62E-01 | 8.42E-01 | LC/MS Pos Early |                           |          | 100009407 |
| Stearoylcholine*                                   | Lipid                  | Fatty Acid Metabolism (Acyl Choline)                  | 0.98 (0.91, 1.05) | 5.65E-01 | 8.44E-01 | LC/MS Pos Late  |                           |          | 100015759 |

|                                    |                        |                                                         |                   |          |          |                 |                           |           |           |
|------------------------------------|------------------------|---------------------------------------------------------|-------------------|----------|----------|-----------------|---------------------------|-----------|-----------|
| O-Sulfo-L-tyrosine                 | Xenobiotics            | Chemical                                                | 0.98 (0.90, 1.06) | 5.67E-01 | 8.44E-01 | LC/MS Neg       |                           | 514186    | 100005384 |
| 4-Vinylguaiacol glucuronide        | Xenobiotics            | Food Component/Plant                                    | 1.02 (0.95, 1.10) | 5.67E-01 | 8.44E-01 | LC/MS Neg       |                           |           | 100021209 |
| 6-Oxopiperidine-2-carboxylate      | Amino Acid             | Lysine Metabolism                                       | 1.02 (0.95, 1.10) | 5.68E-01 | 8.44E-01 | LC/MS Neg       | <a href="#">HMDB61705</a> | 3014237   | 100004499 |
| 1-Methyl-4-imidazoleacetate        | Amino Acid             | Histidine Metabolism                                    | 0.98 (0.91, 1.06) | 5.69E-01 | 8.44E-01 | LC/MS Pos Early | <a href="#">HMDB02820</a> | 75810     | 100001208 |
| 3-Methyl-2-oxovalerate             | Amino Acid             | Leucine, Isoleucine and Valine Metabolism               | 0.98 (0.91, 1.06) | 5.70E-01 | 8.44E-01 | LC/MS Neg       | <a href="#">HMDB03736</a> | 47        | 100000036 |
| 1,3-Dimethylurate                  | Xenobiotics            | Xanthine Metabolism                                     | 0.98 (0.91, 1.06) | 5.71E-01 | 8.44E-01 | LC/MS Neg       | <a href="#">HMDB01857</a> | 70346     | 100001106 |
| 3-Hydroxy-2-ethylpropionate        | Amino Acid             | Leucine, Isoleucine and Valine Metabolism               | 0.98 (0.91, 1.05) | 5.73E-01 | 8.45E-01 | LC/MS Neg       | <a href="#">HMDB00396</a> | 188979    | 100001170 |
| Trans-3,4-methyleneheptanoate      | Xenobiotics            | Food Component/Plant                                    | 0.98 (0.91, 1.05) | 5.74E-01 | 8.45E-01 | LC/MS Neg       |                           |           | 100006651 |
| Myo-inositol                       | Lipid                  | Inositol Metabolism                                     | 0.98 (0.91, 1.06) | 5.74E-01 | 8.45E-01 | LC/MS Polar     | <a href="#">HMDB00211</a> | 892       | 363       |
| $\alpha$ -CEHC glucuronide*        | Cofactors and Vitamins | Tocopherol Metabolism                                   | 1.02 (0.94, 1.11) | 5.78E-01 | 8.47E-01 | LC/MS Neg       |                           | 134819285 | 100003101 |
| SM (d18:1/18:0)                    | Lipid                  | Sphingomyelins                                          | 1.02 (0.95, 1.10) | 5.80E-01 | 8.47E-01 | LC/MS Pos Late  | <a href="#">HMDB01348</a> | 6453725   | 1538      |
| Octadecanedioate (C18-DC)          | Lipid                  | Fatty Acid, Dicarboxylate                               | 0.98 (0.91, 1.06) | 5.81E-01 | 8.47E-01 | LC/MS Neg       | <a href="#">HMDB00782</a> | 70095     | 100001615 |
| Xylose                             | Carbohydrate           | Pentose Metabolism                                      | 0.98 (0.91, 1.06) | 5.81E-01 | 8.47E-01 | LC/MS Polar     | <a href="#">HMDB00098</a> | 135191    | 826       |
| PC (18:0/20:4)                     | Lipid                  | Phosphatidylcholine (PC)                                | 0.98 (0.91, 1.06) | 5.82E-01 | 8.47E-01 | LC/MS Pos Late  | <a href="#">HMDB08048</a> | 16219824  | 100001869 |
| 1-Linolenoylglycerol (18:3)        | Lipid                  | Monoacylglycerol                                        | 0.98 (0.91, 1.05) | 5.82E-01 | 8.47E-01 | LC/MS Neg       | <a href="#">HMDB11569</a> | 53480978  | 100001435 |
| Sphingadienine                     | Lipid                  | Sphingolipid Synthesis                                  | 0.98 (0.92, 1.05) | 5.83E-01 | 8.47E-01 | LC/MS Pos Late  |                           | 6449795   | 100015643 |
| Lactose                            | Carbohydrate           | Disaccharides and Oligosaccharides                      | 0.98 (0.91, 1.05) | 5.83E-01 | 8.47E-01 | LC/MS Polar     | <a href="#">HMDB00186</a> | 84571     | 393       |
| Hexadecadienoate (16:2n6)          | Lipid                  | Long Chain Polyunsaturated Fatty Acid (n3 and n6)       | 0.98 (0.91, 1.05) | 5.86E-01 | 8.49E-01 | LC/MS Neg       | <a href="#">HMDB00477</a> | 13932172  | 100009394 |
| Benzoate                           | Xenobiotics            | Benzoate Metabolism                                     | 0.98 (0.91, 1.05) | 5.87E-01 | 8.49E-01 | LC/MS Neg       | <a href="#">HMDB01870</a> | 243       | 100000008 |
| N-Acetylphenylalanine              | Amino Acid             | Phenylalanine Metabolism                                | 1.02 (0.95, 1.10) | 5.92E-01 | 8.54E-01 | LC/MS Neg       | <a href="#">HMDB00512</a> | 74839     | 100001256 |
| N-Carbamoylalanine                 | Amino Acid             | Alanine and Aspartate Metabolism                        | 0.98 (0.90, 1.06) | 5.92E-01 | 8.54E-01 | LC/MS Pos Early |                           | 426409    | 100006369 |
| Vanillic acid glycine              | Xenobiotics            | Food Component/Plant                                    | 0.98 (0.91, 1.06) | 5.94E-01 | 8.55E-01 | LC/MS Neg       | <a href="#">HMDB60026</a> | 3083688   | 100021363 |
| 3-Hydroxydecanoylcarnitine         | Lipid                  | Fatty Acid Metabolism (Acyl Carnitine, Hydroxy)         | 0.98 (0.91, 1.06) | 5.95E-01 | 8.55E-01 | LC/MS Pos Late  | <a href="#">HMDB61636</a> |           | 100021141 |
| Indolepropionylglycine             | Amino Acid             | Tryptophan Metabolism                                   | 0.98 (0.91, 1.06) | 5.98E-01 | 8.55E-01 | LC/MS Neg       |                           | 7677842   | 100010863 |
| Methylsuccinate                    | Amino Acid             | Leucine, Isoleucine and Valine Metabolism               | 0.98 (0.91, 1.06) | 5.98E-01 | 8.55E-01 | LC/MS Polar     | <a href="#">HMDB01844</a> | 10349     | 2051      |
| 5-Hydroxy-2-methylpyridine sulfate | Xenobiotics            | Chemical                                                | 0.98 (0.91, 1.06) | 5.99E-01 | 8.55E-01 | LC/MS Neg       |                           |           | 100020973 |
| Undecenoylcarnitine (C11:1)        | Lipid                  | Fatty Acid Metabolism (Acyl Carnitine, Monounsaturated) | 1.02 (0.95, 1.10) | 6.00E-01 | 8.55E-01 | LC/MS Pos Late  |                           |           | 100021131 |
| Dibutyl sulfosuccinate             | Xenobiotics            | Chemical                                                | 1.02 (0.95, 1.09) | 6.00E-01 | 8.55E-01 | LC/MS Neg       |                           | 423891    | 100021538 |
| Furaneol sulfate                   | Xenobiotics            | Food Component/Plant                                    | 1.02 (0.95, 1.10) | 6.02E-01 | 8.56E-01 | LC/MS Neg       |                           |           | 100009328 |
| Maltose                            | Carbohydrate           | Glycogen Metabolism                                     | 0.98 (0.91, 1.05) | 6.03E-01 | 8.56E-01 | LC/MS Polar     | <a href="#">HMDB00163</a> | 10991489  | 913       |
| 2-Hydroxypalmitate                 | Lipid                  | Fatty Acid, Monohydroxy                                 | 0.98 (0.91, 1.06) | 6.03E-01 | 8.56E-01 | LC/MS Neg       | <a href="#">HMDB31057</a> | 92836     | 100001579 |
| 2-Hydroxy-3-methylvalerate         | Amino Acid             | Leucine, Isoleucine and Valine Metabolism               | 0.98 (0.91, 1.06) | 6.06E-01 | 8.59E-01 | LC/MS Neg       | <a href="#">HMDB00317</a> | 164623    | 100001541 |
| Glycocholenate sulfate*            | Lipid                  | Secondary Bile Acid Metabolism                          | 1.02 (0.95, 1.10) | 6.07E-01 | 8.59E-01 | LC/MS Neg       |                           |           | 100001989 |

|                                              |                        |                                                      |                   |          |          |                 |                           |          |           |
|----------------------------------------------|------------------------|------------------------------------------------------|-------------------|----------|----------|-----------------|---------------------------|----------|-----------|
| 4-Ethylphenylsulfate                         | Xenobiotics            | Benzoate Metabolism                                  | 1.02 (0.95, 1.10) | 6.09E-01 | 8.59E-01 | LC/MS Neg       | <a href="#">HMDB62551</a> | 20822574 | 100001756 |
| Mannonate*                                   | Xenobiotics            | Food Component/Plant                                 | 1.02 (0.95, 1.10) | 6.11E-01 | 8.61E-01 | LC/MS Polar     |                           | 3246006  | 100003695 |
| Tauro-β-muricholate                          | Lipid                  | Primary Bile Acid Metabolism                         | 0.98 (0.91, 1.06) | 6.12E-01 | 8.61E-01 | LC/MS Neg       | <a href="#">HMDB00932</a> | 168408   | 100001250 |
| SM (d18:1/19:0, d19:1/18:0)*                 | Lipid                  | Sphingomyelins                                       | 0.98 (0.91, 1.06) | 6.16E-01 | 8.65E-01 | LC/MS Pos Late  |                           |          | 100015787 |
| Laurylcarnitine (C12)                        | Lipid                  | Fatty Acid Metabolism (Acyl Carnitine, Medium Chain) | 1.02 (0.95, 1.10) | 6.17E-01 | 8.65E-01 | LC/MS Pos Late  | <a href="#">HMDB02250</a> | 10427569 | 100001392 |
| I-Urobilinogen                               | Cofactors and Vitamins | Hemoglobin and Porphyrin Metabolism                  | 0.98 (0.91, 1.06) | 6.18E-01 | 8.65E-01 | LC/MS Neg       | <a href="#">HMDB04157</a> | 26818    | 100001226 |
| 2-Hydroxyphenylacetate sulfate               | Amino Acid             | Phenylalanine Metabolism                             | 1.02 (0.95, 1.10) | 6.19E-01 | 8.65E-01 | LC/MS Neg       |                           |          | 100006635 |
| Glycocholate                                 | Lipid                  | Primary Bile Acid Metabolism                         | 0.98 (0.91, 1.06) | 6.20E-01 | 8.66E-01 | LC/MS Neg       | <a href="#">HMDB00138</a> | 10140    | 342       |
| 4-Hydroxyphenylpyruvate                      | Amino Acid             | Tyrosine Metabolism                                  | 0.98 (0.91, 1.06) | 6.25E-01 | 8.67E-01 | LC/MS Neg       | <a href="#">HMDB00707</a> | 979      | 1141      |
| Glycosyl-N-stearoyl-sphingosine (d18:1/18:0) | Lipid                  | Hexosylceramides (HCER)                              | 0.98 (0.91, 1.06) | 6.25E-01 | 8.67E-01 | LC/MS Pos Late  |                           |          | 100001882 |
| γ-Glutamylisoleucine*                        | Peptide                | Gamma-glutamyl Amino Acid                            | 1.02 (0.94, 1.11) | 6.25E-01 | 8.67E-01 | LC/MS Pos Early | <a href="#">HMDB11170</a> | 14253342 | 100001485 |
| Docosahexaenoate (DHA; 22:6n3)               | Lipid                  | Long Chain Polyunsaturated Fatty Acid (n3 and n6)    | 0.98 (0.91, 1.06) | 6.26E-01 | 8.67E-01 | LC/MS Neg       | <a href="#">HMDB02183</a> | 445580   | 100000665 |
| 3-Aminoisobutyrate                           | Nucleotide             | Pyrimidine Metabolism, Thymine containing            | 0.98 (0.91, 1.06) | 6.27E-01 | 8.67E-01 | LC/MS Pos Early | <a href="#">HMDB03911</a> | 64956    | 1114      |
| N-Stearoyltaurine                            | Lipid                  | Endocannabinoid                                      | 0.98 (0.92, 1.05) | 6.28E-01 | 8.67E-01 | LC/MS Neg       |                           | 168274   | 100003240 |
| Pyridoxal                                    | Cofactors and Vitamins | Vitamin B6 Metabolism                                | 1.02 (0.95, 1.09) | 6.29E-01 | 8.67E-01 | LC/MS Neg       | <a href="#">HMDB01545</a> | 1050     | 491       |
| 2-Piperidinone                               | Xenobiotics            | Food Component/Plant                                 | 0.98 (0.91, 1.06) | 6.29E-01 | 8.67E-01 | LC/MS Pos Early | <a href="#">HMDB11749</a> | 12665    | 100004295 |
| 3-Methylcrotonylglycine                      | Amino Acid             | Leucine, Isoleucine and Valine Metabolism            | 1.02 (0.95, 1.09) | 6.31E-01 | 8.68E-01 | LC/MS Pos Early | <a href="#">HMDB00459</a> | 169485   | 100001149 |
| Deoxycarnitine                               | Lipid                  | Carnitine Metabolism                                 | 0.98 (0.91, 1.06) | 6.32E-01 | 8.68E-01 | LC/MS Pos Early | <a href="#">HMDB01161</a> | 134      | 100001662 |
| Dihydroferulic acid sulfate                  | Xenobiotics            | Food Component/Plant                                 | 0.98 (0.91, 1.06) | 6.33E-01 | 8.68E-01 | LC/MS Polar     | <a href="#">HMDB41724</a> | 187489   | 100020272 |
| 4-Methoxyphenol sulfate                      | Amino Acid             | Tyrosine Metabolism                                  | 0.98 (0.91, 1.06) | 6.42E-01 | 8.76E-01 | LC/MS Neg       |                           |          | 100006262 |
| Lanthionine                                  | Amino Acid             | Methionine, Cysteine, SAM and Taurine Metabolism     | 0.98 (0.91, 1.06) | 6.43E-01 | 8.76E-01 | LC/MS Pos Early |                           | 98504    | 100003892 |
| Acesulfame                                   | Xenobiotics            | Food Component/Plant                                 | 1.02 (0.95, 1.10) | 6.44E-01 | 8.76E-01 | LC/MS Neg       | <a href="#">HMDB33585</a> | 36573    | 100006203 |
| N-Acetyltheanine                             | Xenobiotics            | Food Component/Plant                                 | 1.02 (0.95, 1.09) | 6.48E-01 | 8.76E-01 | LC/MS Polar     |                           |          | 100020514 |
| Ferulic acid 4-sulfate                       | Xenobiotics            | Food Component/Plant                                 | 0.98 (0.91, 1.06) | 6.48E-01 | 8.76E-01 | LC/MS Neg       | <a href="#">HMDB29200</a> | 6305574  | 100005389 |
| Vanillate glucuronide                        | Xenobiotics            | Food Component/Plant                                 | 1.02 (0.94, 1.10) | 6.49E-01 | 8.76E-01 | LC/MS Polar     |                           |          | 100020606 |
| Pentadecanoate (15:0)                        | Lipid                  | Long Chain Saturated Fatty Acid                      | 0.98 (0.91, 1.06) | 6.49E-01 | 8.76E-01 | LC/MS Neg       | <a href="#">HMDB00826</a> | 13849    | 980       |
| δ-CEHC glucuronide                           | Cofactors and Vitamins | Tocopherol Metabolism                                | 1.02 (0.94, 1.10) | 6.50E-01 | 8.76E-01 | LC/MS Neg       |                           |          | 100020483 |
| 4-Hydroxy-2-oxoglutaric acid                 | Lipid                  | Fatty Acid, Dicarboxylate                            | 1.02 (0.95, 1.09) | 6.51E-01 | 8.76E-01 | LC/MS Polar     | <a href="#">HMDB02070</a> | 599      | 100002537 |
| 5α-Androstan-3α,17β-diol disulfate           | Lipid                  | Androgenic Steroids                                  | 1.02 (0.94, 1.10) | 6.52E-01 | 8.76E-01 | LC/MS Neg       |                           |          | 100002017 |
| Isoeugenol sulfate                           | Xenobiotics            | Food Component/Plant                                 | 1.02 (0.94, 1.10) | 6.54E-01 | 8.76E-01 | LC/MS Neg       |                           |          | 100006089 |
| Taurochenolate sulfate*                      | Lipid                  | Secondary Bile Acid Metabolism                       | 1.02 (0.94, 1.10) | 6.55E-01 | 8.76E-01 | LC/MS Neg       |                           |          | 100001990 |
| N-Acetylcitrulline                           | Amino Acid             | Urea cycle; Arginine and Proline Metabolism          | 1.02 (0.94, 1.10) | 6.55E-01 | 8.76E-01 | LC/MS Neg       | <a href="#">HMDB00856</a> | 656979   | 100001577 |
| 4-Allylphenol sulfate                        | Xenobiotics            | Food Component/Plant                                 | 1.02 (0.94, 1.10) | 6.58E-01 | 8.76E-01 | LC/MS Neg       |                           |          | 100001868 |

|                                                      |                        |                                                         |                   |          |          |                 |                           |          |           |
|------------------------------------------------------|------------------------|---------------------------------------------------------|-------------------|----------|----------|-----------------|---------------------------|----------|-----------|
| Phenol glucuronide                                   | Amino Acid             | Tyrosine Metabolism                                     | 1.02 (0.95, 1.09) | 6.58E-01 | 8.76E-01 | LC/MS Neg       | <a href="#">HMDB60014</a> | 87235    | 100006679 |
| 2-Oxoarginine*                                       | Amino Acid             | Urea cycle; Arginine and Proline Metabolism             | 1.02 (0.94, 1.10) | 6.58E-01 | 8.76E-01 | LC/MS Pos Early | <a href="#">HMDB04225</a> | 558      | 100002784 |
| Palmitoleoylcarnitine (C16:1)*                       | Lipid                  | Fatty Acid Metabolism (Acyl Carnitine, Monounsaturated) | 0.98 (0.91, 1.06) | 6.58E-01 | 8.76E-01 | LC/MS Pos Late  |                           | 71464547 | 100009406 |
| Dihomo-linolenoyl-choline                            | Lipid                  | Fatty Acid Metabolism (Acyl Choline)                    | 0.98 (0.91, 1.06) | 6.59E-01 | 8.76E-01 | LC/MS Pos Late  |                           |          | 100009335 |
| Citramalate                                          | Amino Acid             | Glutamate Metabolism                                    | 1.02 (0.95, 1.09) | 6.59E-01 | 8.76E-01 | LC/MS Pos Early | <a href="#">HMDB00426</a> | 1081     | 100000998 |
| 3-Hydroxyisobutyrate                                 | Amino Acid             | Leucine, Isoleucine and Valine Metabolism               | 1.02 (0.94, 1.10) | 6.59E-01 | 8.76E-01 | LC/MS Polar     | <a href="#">HMDB00336</a> | 87       | 111       |
| N-Acetylvaline                                       | Amino Acid             | Leucine, Isoleucine and Valine Metabolism               | 0.98 (0.91, 1.06) | 6.60E-01 | 8.76E-01 | LC/MS Neg       | <a href="#">HMDB11757</a> | 66789    | 1084      |
| Arachidonate (20:4n6)                                | Lipid                  | Long Chain Polyunsaturated Fatty Acid (n3 and n6)       | 0.98 (0.91, 1.06) | 6.65E-01 | 8.80E-01 | LC/MS Neg       | <a href="#">HMDB01043</a> | 444899   | 229       |
| Umbelliferone sulfate                                | Xenobiotics            | Food Component/Plant                                    | 0.98 (0.91, 1.06) | 6.66E-01 | 8.80E-01 | LC/MS Neg       |                           | 129659   | 100006282 |
| γ-CEHC                                               | Cofactors and Vitamins | Tocopherol Metabolism                                   | 0.98 (0.91, 1.06) | 6.67E-01 | 8.80E-01 | LC/MS Neg       | <a href="#">HMDB01931</a> | 133098   | 100002094 |
| 3-Hydroxyhexanoate                                   | Lipid                  | Fatty Acid, Monohydroxy                                 | 0.98 (0.91, 1.06) | 6.68E-01 | 8.80E-01 | LC/MS Neg       |                           | 151492   | 100006367 |
| Alliin                                               | Xenobiotics            | Food Component/Plant                                    | 0.98 (0.91, 1.06) | 6.69E-01 | 8.80E-01 | LC/MS Pos Early | <a href="#">HMDB33592</a> | 87310    | 100003473 |
| Tryptophan                                           | Amino Acid             | Tryptophan Metabolism                                   | 1.02 (0.94, 1.10) | 6.70E-01 | 8.80E-01 | LC/MS Pos Early | <a href="#">HMDB00929</a> | 6305     | 565       |
| N1-Methyl-2-pyridone-5-carboxamide                   | Cofactors and Vitamins | Nicotinate and Nicotinamide Metabolism                  | 0.98 (0.92, 1.06) | 6.70E-01 | 8.80E-01 | LC/MS Neg       | <a href="#">HMDB04193</a> | 69698    | 100001468 |
| 4-Hydroxyphenylacetate                               | Amino Acid             | Phenylalanine Metabolism                                | 0.98 (0.91, 1.06) | 6.77E-01 | 8.87E-01 | LC/MS Neg       | <a href="#">HMDB00020</a> | 127      | 144       |
| Palmitate (16:0)                                     | Lipid                  | Long Chain Saturated Fatty Acid                         | 0.98 (0.91, 1.06) | 6.80E-01 | 8.90E-01 | LC/MS Neg       | <a href="#">HMDB00220</a> | 985      | 424       |
| 3β,7α-Dihydroxy-5-cholestenoate                      | Lipid                  | Sterol                                                  | 0.98 (0.92, 1.06) | 6.82E-01 | 8.91E-01 | LC/MS Neg       |                           | 3081084  | 100001611 |
| SM (d18:1/25:0, d19:0/24:1, d20:1/23:0, d19:1/24:0)* | Lipid                  | Sphingomyelins                                          | 0.98 (0.91, 1.06) | 6.84E-01 | 8.92E-01 | LC/MS Pos Late  |                           |          | 100015792 |
| 3,7-Dimethylurate                                    | Xenobiotics            | Xanthine Metabolism                                     | 0.99 (0.92, 1.06) | 6.84E-01 | 8.92E-01 | LC/MS Neg       | <a href="#">HMDB01982</a> | 83126    | 100001398 |
| 1-Oleoylglycerol (18:1)                              | Lipid                  | Monoacylglycerol                                        | 1.02 (0.94, 1.10) | 6.88E-01 | 8.96E-01 | LC/MS Neg       | <a href="#">HMDB11567</a> | 5283468  | 100000924 |
| Naringenin 7-glucuronide                             | Xenobiotics            | Food Component/Plant                                    | 0.99 (0.92, 1.06) | 6.90E-01 | 8.96E-01 | LC/MS Neg       |                           |          | 100010898 |
| 2'-O-Methyluridine                                   | Nucleotide             | Pyrimidine Metabolism, Uracil containing                | 0.98 (0.91, 1.06) | 6.93E-01 | 8.99E-01 | LC/MS Neg       |                           | 102212   | 100010896 |
| DihydroSM (18:0/22:0)*                               | Lipid                  | Dihydrosphingomyelins                                   | 1.01 (0.94, 1.09) | 6.97E-01 | 9.00E-01 | LC/MS Pos Late  | <a href="#">HMDB12091</a> |          | 100009026 |
| heme                                                 | Cofactors and Vitamins | Hemoglobin and Porphyrin Metabolism                     | 1.02 (0.94, 1.10) | 6.98E-01 | 9.00E-01 | LC/MS Pos Late  | <a href="#">HMDB03178</a> | 26945    | 100001386 |
| (R)-3-Hydroxybutyrylcarnitine                        | Lipid                  | Fatty Acid Metabolism (Acyl Carnitine, Hydroxy)         | 1.02 (0.94, 1.10) | 6.98E-01 | 9.00E-01 | LC/MS Pos Early | <a href="#">HMDB13127</a> | 53481617 | 100003926 |
| Desmethylnaproxen sulfate                            | Xenobiotics            | Drug - Analgesics, Anesthetics                          | 1.01 (0.94, 1.09) | 6.99E-01 | 9.00E-01 | LC/MS Neg       |                           | 184679   | 100001788 |
| Docosahexaenoylcarnitine (C22:6)*                    | Lipid                  | Fatty Acid Metabolism (Acyl Carnitine, Polyunsaturated) | 0.99 (0.92, 1.06) | 6.99E-01 | 9.00E-01 | LC/MS Pos Late  |                           |          | 100015845 |
| Trans-urocanate                                      | Amino Acid             | Histidine Metabolism                                    | 1.01 (0.94, 1.09) | 7.00E-01 | 9.00E-01 | LC/MS Polar     | <a href="#">HMDB00301</a> | 736715   | 537       |
| α-Ketobutyrate                                       | Amino Acid             | Methionine, Cysteine, SAM and Taurine Metabolism        | 0.99 (0.91, 1.06) | 7.05E-01 | 9.04E-01 | LC/MS Polar     | <a href="#">HMDB00005</a> | 58       | 796       |
| Daidzein sulfate (2)                                 | Xenobiotics            | Food Component/Plant                                    | 0.99 (0.92, 1.06) | 7.06E-01 | 9.04E-01 | LC/MS Neg       |                           |          | 100006363 |
| Linoleoyl-linoleoyl-glycerol (18:2/18:2) [2]*        | Lipid                  | Diacylglycerol                                          | 0.99 (0.92, 1.06) | 7.06E-01 | 9.04E-01 | LC/MS Pos Late  |                           |          | 100010942 |
| 3-Hydroxyhippurate sulfate                           | Xenobiotics            | Benzoate Metabolism                                     | 0.99 (0.91, 1.06) | 7.08E-01 | 9.05E-01 | LC/MS Neg       |                           | 186339   | 100020410 |

|                                                 |                        |                                                      |                   |          |          |                 |                           |         |           |
|-------------------------------------------------|------------------------|------------------------------------------------------|-------------------|----------|----------|-----------------|---------------------------|---------|-----------|
| 4-Methylcatechol sulfate                        | Xenobiotics            | Benzoate Metabolism                                  | 0.99 (0.91, 1.06) | 7.10E-01 | 9.05E-01 | LC/MS Neg       |                           |         | 100004111 |
| Palmitoyl ethanolamide                          | Lipid                  | Endocannabinoid                                      | 0.99 (0.92, 1.06) | 7.10E-01 | 9.05E-01 | LC/MS Neg       | <a href="#">HMDB02100</a> | 4671    | 1489      |
| 11-Ketoetiocholanolone glucuronide              | Lipid                  | Androgenic Steroids                                  | 0.99 (0.92, 1.06) | 7.15E-01 | 9.08E-01 | LC/MS Neg       |                           |         | 100005402 |
| Glycoursodeoxycholic acid sulfate (1)           | Lipid                  | Secondary Bile Acid Metabolism                       | 0.99 (0.92, 1.06) | 7.15E-01 | 9.08E-01 | LC/MS Neg       |                           |         | 100020819 |
| Myristoleate (14:1n5)                           | Lipid                  | Long Chain Monounsaturated Fatty Acid                | 0.99 (0.92, 1.06) | 7.17E-01 | 9.08E-01 | LC/MS Neg       | <a href="#">HMDB02000</a> | 5281119 | 100001198 |
| Trigonelline (N <sup>1</sup> -methylnicotinate) | Cofactors and Vitamins | Nicotinate and Nicotinamide Metabolism               | 1.01 (0.94, 1.09) | 7.17E-01 | 9.08E-01 | LC/MS Pos Early | <a href="#">HMDB00875</a> | 5570    | 100001092 |
| N6-Methyllysine                                 | Amino Acid             | Lysine Metabolism                                    | 1.01 (0.94, 1.09) | 7.19E-01 | 9.08E-01 | LC/MS Pos Early | <a href="#">HMDB02038</a> | 164795  | 100003415 |
| Glutamate                                       | Amino Acid             | Glutamate Metabolism                                 | 0.99 (0.91, 1.06) | 7.20E-01 | 9.08E-01 | LC/MS Pos Early | <a href="#">HMDB00148</a> | 611     | 561       |
| 1-Carboxyethylvaline                            | Amino Acid             | Leucine, Isoleucine and Valine Metabolism            | 1.01 (0.94, 1.09) | 7.20E-01 | 9.08E-01 | LC/MS Neg       |                           |         | 100020423 |
| Orotate                                         | Nucleotide             | Pyrimidine Metabolism, Orotate containing            | 1.01 (0.94, 1.09) | 7.25E-01 | 9.14E-01 | LC/MS Polar     | <a href="#">HMDB00226</a> | 967     | 445       |
| 1-Carboxyethylisoleucine                        | Amino Acid             | Leucine, Isoleucine and Valine Metabolism            | 1.01 (0.94, 1.10) | 7.27E-01 | 9.14E-01 | LC/MS Neg       |                           |         | 100020427 |
| Tigloylglycine                                  | Amino Acid             | Leucine, Isoleucine and Valine Metabolism            | 0.99 (0.92, 1.06) | 7.28E-01 | 9.14E-01 | LC/MS Pos Early | <a href="#">HMDB00959</a> | 6441567 | 1161      |
| 5-Methyluridine (ribothymidine)                 | Nucleotide             | Pyrimidine Metabolism, Uracil containing             | 1.01 (0.94, 1.09) | 7.31E-01 | 9.15E-01 | LC/MS Neg       | <a href="#">HMDB00884</a> | 445408  | 100001446 |
| 3-Hydroxyoleoylcarnitine                        | Lipid                  | Fatty Acid Metabolism (Acyl Carnitine, Hydroxy)      | 0.99 (0.91, 1.06) | 7.31E-01 | 9.15E-01 | LC/MS Pos Late  |                           |         | 100019801 |
| 1-Methylhistidine                               | Amino Acid             | Histidine Metabolism                                 | 1.01 (0.94, 1.10) | 7.32E-01 | 9.15E-01 | LC/MS Neg       | <a href="#">HMDB00001</a> | 92105   | 100001051 |
| Kynurenate                                      | Amino Acid             | Tryptophan Metabolism                                | 0.99 (0.92, 1.06) | 7.33E-01 | 9.15E-01 | LC/MS Neg       | <a href="#">HMDB00715</a> | 3845    | 98        |
| α-Tocopherol                                    | Cofactors and Vitamins | Tocopherol Metabolism                                | 0.99 (0.91, 1.07) | 7.35E-01 | 9.17E-01 | LC/MS Pos Late  | <a href="#">HMDB01893</a> | 14985   | 1105      |
| β-Hydroxyisovalerate                            | Amino Acid             | Leucine, Isoleucine and Valine Metabolism            | 1.01 (0.94, 1.09) | 7.37E-01 | 9.18E-01 | LC/MS Neg       | <a href="#">HMDB00754</a> | 69362   | 1442      |
| Tetradecadienedioate (C14:2-DC)*                | Lipid                  | Fatty Acid, Dicarboxylate                            | 0.99 (0.92, 1.06) | 7.39E-01 | 9.19E-01 | LC/MS Neg       |                           |         | 100021100 |
| Tauroursodeoxycholate                           | Lipid                  | Secondary Bile Acid Metabolism                       | 0.99 (0.91, 1.07) | 7.41E-01 | 9.20E-01 | LC/MS Neg       | <a href="#">HMDB00874</a> | 9848818 | 100002912 |
| Caffeine                                        | Xenobiotics            | Xanthine Metabolism                                  | 0.99 (0.92, 1.06) | 7.42E-01 | 9.20E-01 | LC/MS Pos Early | <a href="#">HMDB01847</a> | 2519    | 849       |
| SM (d18:1/18:1, d18:2/18:0)                     | Lipid                  | Sphingomyelins                                       | 0.99 (0.91, 1.07) | 7.43E-01 | 9.20E-01 | LC/MS Pos Late  | <a href="#">HMDB12101</a> | 6443882 | 100002106 |
| Salicylic glucuronide*                          | Xenobiotics            | Drug - Analgesics, Anesthetics                       | 1.01 (0.94, 1.09) | 7.48E-01 | 9.25E-01 | LC/MS Neg       |                           |         | 100001332 |
| 5-Methylthioadenosine (MTA)                     | Amino Acid             | Polyamine Metabolism                                 | 1.01 (0.94, 1.09) | 7.50E-01 | 9.25E-01 | LC/MS Pos Early | <a href="#">HMDB01173</a> | 439176  | 212       |
| Methylmalonate (MMA)                            | Lipid                  | Fatty Acid Metabolism (also BCAA Metabolism)         | 1.01 (0.94, 1.09) | 7.50E-01 | 9.25E-01 | LC/MS Polar     | <a href="#">HMDB00202</a> | 487     | 418       |
| Hypoxanthine                                    | Nucleotide             | Purine Metabolism, (Hypo)Xanthine/Inosine containing | 1.01 (0.94, 1.09) | 7.51E-01 | 9.25E-01 | LC/MS Neg       | <a href="#">HMDB00157</a> | 790     | 171       |
| Picolinate                                      | Amino Acid             | Tryptophan Metabolism                                | 0.99 (0.92, 1.06) | 7.53E-01 | 9.26E-01 | LC/MS Pos Early | <a href="#">HMDB02243</a> | 1018    | 1022      |
| 3-Hydroxydecanoate                              | Lipid                  | Fatty Acid, Monohydroxy                              | 0.99 (0.92, 1.06) | 7.56E-01 | 9.28E-01 | LC/MS Neg       | <a href="#">HMDB02203</a> | 26612   | 100000997 |
| Pyruvate                                        | Carbohydrate           | Glycolysis, Gluconeogenesis, and Pyruvate Metabolism | 0.99 (0.92, 1.06) | 7.59E-01 | 9.30E-01 | LC/MS Polar     | <a href="#">HMDB00243</a> | 1060    | 823       |
| Sulfate of piperine metabolite C18H21NO3 (1)*   | Xenobiotics            | Food Component/Plant                                 | 1.01 (0.94, 1.09) | 7.60E-01 | 9.30E-01 | LC/MS Neg       |                           |         | 100020502 |
| Decadienedioic acid (C10:2-DC)**                | Lipid                  | Fatty Acid, Dicarboxylate                            | 0.99 (0.92, 1.07) | 7.68E-01 | 9.34E-01 | LC/MS Neg       |                           |         | 100021711 |



|                                                  |                        |                                                              |                   |          |          |                 |                           |         |           |
|--------------------------------------------------|------------------------|--------------------------------------------------------------|-------------------|----------|----------|-----------------|---------------------------|---------|-----------|
| N2-Acetyl,N6-methyllysine                        | Amino Acid             | Lysine Metabolism                                            | 1.01 (0.94, 1.09) | 7.68E-01 | 9.34E-01 | LC/MS Pos Early |                           |         | 100020546 |
| N-Formylphenylalanine                            | Amino Acid             | Tyrosine Metabolism                                          | 0.99 (0.92, 1.06) | 7.68E-01 | 9.34E-01 | LC/MS Neg       |                           | 759256  | 100006056 |
| γ-Carboxyglutamate                               | Amino Acid             | Glutamate Metabolism                                         | 0.99 (0.92, 1.07) | 7.68E-01 | 9.34E-01 | LC/MS Pos Early | <a href="#">HMDB41900</a> | 40772   | 100002679 |
| 2-Hydroxy-4-(methylthio)butanoic acid            | Amino Acid             | Methionine, Cysteine, SAM and Taurine Metabolism             | 0.99 (0.92, 1.06) | 7.69E-01 | 9.34E-01 | LC/MS Polar     |                           |         | 100021372 |
| Fibrinopeptide A, des-ala(1)*                    | Peptide                | Fibrinogen Cleavage Peptide                                  | 1.01 (0.94, 1.09) | 7.70E-01 | 9.34E-01 | LC/MS Neg       |                           |         | 100001323 |
| 5-Oxoproline                                     | Amino Acid             | Glutathione Metabolism                                       | 0.99 (0.92, 1.07) | 7.71E-01 | 9.34E-01 | LC/MS Neg       | <a href="#">HMDB00267</a> | 7405    | 1021      |
| Sarcosine                                        | Amino Acid             | Glycine, Serine and Threonine Metabolism                     | 1.01 (0.94, 1.09) | 7.71E-01 | 9.34E-01 | LC/MS Pos Early | <a href="#">HMDB00271</a> | 1088    | 1023      |
| γ-Glutamyltryptophan                             | Peptide                | Gamma-glutamyl Amino Acid                                    | 0.99 (0.92, 1.07) | 7.73E-01 | 9.35E-01 | LC/MS Neg       | <a href="#">HMDB29160</a> | 3989307 | 100001295 |
| 10-Heptadecenoate (17:1n7)                       | Lipid                  | Long Chain Monounsaturated Fatty Acid                        | 0.99 (0.92, 1.07) | 7.75E-01 | 9.35E-01 | LC/MS Neg       | <a href="#">HMDB60038</a> | 5312435 | 100001278 |
| Hexadecanedioate (C16-DC)                        | Lipid                  | Fatty Acid, Dicarboxylate                                    | 0.99 (0.92, 1.07) | 7.76E-01 | 9.35E-01 | LC/MS Neg       | <a href="#">HMDB00672</a> | 10459   | 100001614 |
| Myristoylcarnitine (C14)                         | Lipid                  | Fatty Acid Metabolism (Acyl Carnitine, Long Chain Saturated) | 0.99 (0.92, 1.07) | 7.79E-01 | 9.37E-01 | LC/MS Pos Late  | <a href="#">HMDB05066</a> | 6426854 | 100001270 |
| N-Methylhydroxyproline**                         | Amino Acid             | Urea cycle; Arginine and Proline Metabolism                  | 0.99 (0.91, 1.07) | 7.81E-01 | 9.38E-01 | LC/MS Pos Early |                           | 9860390 | 100020215 |
| Naproxen                                         | Xenobiotics            | Drug - Analgesics, Anesthetics                               | 1.01 (0.94, 1.08) | 7.82E-01 | 9.39E-01 | LC/MS Neg       | <a href="#">HMDB01923</a> | 156391  | 1384      |
| Glutarate (C5-DC)                                | Lipid                  | Fatty Acid, Dicarboxylate                                    | 0.99 (0.92, 1.07) | 7.85E-01 | 9.39E-01 | LC/MS Polar     | <a href="#">HMDB00661</a> | 743     | 339       |
| 4-Vinylguaiaicol sulfate                         | Xenobiotics            | Food Component/Plant                                         | 0.99 (0.92, 1.07) | 7.85E-01 | 9.39E-01 | LC/MS Neg       |                           |         | 100006126 |
| Acisoga                                          | Amino Acid             | Polyamine Metabolism                                         | 0.99 (0.92, 1.07) | 7.85E-01 | 9.39E-01 | LC/MS Neg       |                           | 129397  | 100004541 |
| Taurocholate                                     | Lipid                  | Primary Bile Acid Metabolism                                 | 1.01 (0.94, 1.09) | 7.87E-01 | 9.40E-01 | LC/MS Neg       | <a href="#">HMDB00036</a> | 6675    | 1648      |
| Methionine sulfone                               | Amino Acid             | Methionine, Cysteine, SAM and Taurine Metabolism             | 0.99 (0.91, 1.07) | 7.93E-01 | 9.43E-01 | LC/MS Pos Early |                           | 69961   | 100004635 |
| Adrenoylcarnitine (C22:4)*                       | Lipid                  | Fatty Acid Metabolism (Acyl Carnitine, Polyunsaturated)      | 1.01 (0.94, 1.09) | 7.96E-01 | 9.43E-01 | LC/MS Pos Late  |                           |         | 100015850 |
| Linoleoyl-linoleoyl-glycerol (18:2/18:2) [1]*    | Lipid                  | Diacylglycerol                                               | 0.99 (0.92, 1.07) | 7.96E-01 | 9.43E-01 | LC/MS Pos Late  |                           |         | 100010941 |
| γ-Glutamyltyrosine                               | Peptide                | Gamma-glutamyl Amino Acid                                    | 0.99 (0.91, 1.07) | 7.96E-01 | 9.43E-01 | LC/MS Pos Early | <a href="#">HMDB11741</a> | 94340   | 1102      |
| β-Hydroxyisovalerylcarnitine                     | Amino Acid             | Leucine, Isoleucine and Valine Metabolism                    | 0.99 (0.92, 1.07) | 7.97E-01 | 9.43E-01 | LC/MS Pos Early |                           |         | 100001594 |
| 3-Methoxytyrosine                                | Amino Acid             | Tyrosine Metabolism                                          | 0.99 (0.92, 1.06) | 7.98E-01 | 9.43E-01 | LC/MS Pos Early | <a href="#">HMDB01434</a> | 1670    | 1342      |
| 2'-Deoxyuridine                                  | Nucleotide             | Pyrimidine Metabolism, Uracil containing                     | 0.99 (0.92, 1.06) | 7.99E-01 | 9.43E-01 | LC/MS Polar     | <a href="#">HMDB00012</a> | 13712   | 536       |
| Bilirubin (E,E)*                                 | Cofactors and Vitamins | Hemoglobin and Porphyrin Metabolism                          | 0.99 (0.92, 1.06) | 7.99E-01 | 9.43E-01 | LC/MS Neg       |                           | 5315454 | 100001950 |
| Prolylglycine                                    | Peptide                | Dipeptide                                                    | 1.01 (0.94, 1.09) | 8.00E-01 | 9.43E-01 | LC/MS Pos Early | <a href="#">HMDB11178</a> | 6426709 | 100003674 |
| Laurate (12:0)                                   | Lipid                  | Medium Chain Fatty Acid                                      | 1.01 (0.94, 1.08) | 8.01E-01 | 9.43E-01 | LC/MS Neg       | <a href="#">HMDB00638</a> | 3893    | 181       |
| N6,N6,N6-Trimethyllysine                         | Amino Acid             | Lysine Metabolism                                            | 0.99 (0.92, 1.07) | 8.02E-01 | 9.43E-01 | LC/MS Pos Early | <a href="#">HMDB01325</a> | 440120  | 189       |
| Octadecenedioylcarnitine (C18:1-DC)*             | Lipid                  | Fatty Acid Metabolism (Acyl Carnitine, Dicarboxylate)        | 0.99 (0.91, 1.07) | 8.04E-01 | 9.43E-01 | LC/MS Pos Late  |                           |         | 100005996 |
| Palmitoleoyl-linoleoyl-glycerol (16:1/18:2) [1]* | Lipid                  | Diacylglycerol                                               | 1.01 (0.94, 1.09) | 8.07E-01 | 9.43E-01 | LC/MS Pos Late  |                           |         | 100010930 |
| Bilirubin (Z,Z)                                  | Cofactors and Vitamins | Hemoglobin and Porphyrin Metabolism                          | 0.99 (0.92, 1.07) | 8.10E-01 | 9.43E-01 | LC/MS Pos Late  | <a href="#">HMDB00054</a> | 5280352 | 1090      |
| Vanillactate                                     | Amino Acid             | Tyrosine Metabolism                                          | 0.99 (0.92, 1.07) | 8.10E-01 | 9.43E-01 | LC/MS Neg       | <a href="#">HMDB00913</a> | 160637  | 100006129 |

|                                                              |              |                                                         |                   |          |          |                 |                           |         |           |
|--------------------------------------------------------------|--------------|---------------------------------------------------------|-------------------|----------|----------|-----------------|---------------------------|---------|-----------|
| Dihomo-linolenate (20:3n3 or n6)                             | Lipid        | Long Chain Polyunsaturated Fatty Acid (n3 and n6)       | 0.99 (0.92, 1.07) | 8.10E-01 | 9.43E-01 | LC/MS Neg       | <a href="#">HMDB02925</a> | 5280581 | 100001739 |
| 5-Acetylamino-6-formylamino-3-methyluracil                   | Xenobiotics  | Xanthine Metabolism                                     | 1.01 (0.93, 1.09) | 8.11E-01 | 9.43E-01 | LC/MS Polar     | <a href="#">HMDB11105</a> | 108214  | 100001402 |
| 3-Hydroxyarachidate*                                         | Lipid        | Fatty Acid, Monohydroxy                                 | 1.01 (0.94, 1.09) | 8.11E-01 | 9.43E-01 | LC/MS Neg       |                           | 5282918 | 100019893 |
| Carboxybupropfen glucuronide*                                | Xenobiotics  | Drug - Analgesics, Anesthetics                          | 1.01 (0.94, 1.08) | 8.11E-01 | 9.43E-01 | LC/MS Polar     | <a href="#">HMDB60564</a> |         | 100020212 |
| 5,6-Dihydrouridine                                           | Nucleotide   | Pyrimidine Metabolism, Uracil containing                | 1.01 (0.93, 1.09) | 8.12E-01 | 9.43E-01 | LC/MS Neg       |                           | 94312   | 100001425 |
| N-Acetylalliin                                               | Xenobiotics  | Food Component/Plant                                    | 0.99 (0.92, 1.07) | 8.13E-01 | 9.43E-01 | LC/MS Pos Early |                           |         | 100005367 |
| Palmitoleylcholine                                           | Lipid        | Fatty Acid Metabolism (Acyl Choline)                    | 0.99 (0.92, 1.07) | 8.14E-01 | 9.43E-01 | LC/MS Pos Late  |                           |         | 100009334 |
| Urate                                                        | Nucleotide   | Purine Metabolism, (Hypo)Xanthine/Inosine containing    | 1.01 (0.94, 1.09) | 8.16E-01 | 9.44E-01 | LC/MS Neg       | <a href="#">HMDB00289</a> | 1175    | 1134      |
| Vanillic alcohol sulfate                                     | Amino Acid   | Tyrosine Metabolism                                     | 0.99 (0.92, 1.07) | 8.18E-01 | 9.45E-01 | LC/MS Neg       |                           |         | 100006125 |
| 1H-Indole-7-acetic acid                                      | Xenobiotics  | Bacterial/Fungal                                        | 0.99 (0.92, 1.07) | 8.21E-01 | 9.47E-01 | LC/MS Neg       |                           |         | 100004601 |
| cis-4-Decenoylcarnitine (C10:1)                              | Lipid        | Fatty Acid Metabolism (Acyl Carnitine, Monounsaturated) | 1.01 (0.93, 1.09) | 8.22E-01 | 9.47E-01 | LC/MS Pos Late  |                           |         | 100002259 |
| Pseudouridine                                                | Nucleotide   | Pyrimidine Metabolism, Uracil containing                | 1.01 (0.93, 1.09) | 8.23E-01 | 9.47E-01 | LC/MS Neg       | <a href="#">HMDB00767</a> | 15047   | 821       |
| 7- $\alpha$ -Hydroxy-3-oxo-4-cholestenoate (7-Hoca)          | Lipid        | Sterol                                                  | 0.99 (0.92, 1.07) | 8.23E-01 | 9.47E-01 | LC/MS Neg       | <a href="#">HMDB12458</a> | 3081085 | 100001609 |
| N-Acetylarginine                                             | Amino Acid   | Urea cycle; Arginine and Proline Metabolism             | 0.99 (0.92, 1.07) | 8.26E-01 | 9.47E-01 | LC/MS Pos Early | <a href="#">HMDB04620</a> | 67427   | 100001266 |
| Cys-gly, oxidized                                            | Amino Acid   | Glutathione Metabolism                                  | 1.01 (0.94, 1.09) | 8.28E-01 | 9.47E-01 | LC/MS Neg       |                           | 333293  | 1224      |
| 5 $\alpha$ -Androstan-3 $\beta$ ,17 $\alpha$ -diol disulfate | Lipid        | Androgenic Steroids                                     | 1.01 (0.94, 1.09) | 8.29E-01 | 9.47E-01 | LC/MS Neg       |                           |         | 100002021 |
| Lithocholate sulfate (1)                                     | Lipid        | Secondary Bile Acid Metabolism                          | 1.01 (0.94, 1.08) | 8.30E-01 | 9.47E-01 | LC/MS Neg       |                           |         | 100020823 |
| Dimethyl sulfone                                             | Xenobiotics  | Chemical                                                | 1.01 (0.93, 1.09) | 8.30E-01 | 9.47E-01 | LC/MS Pos Early | <a href="#">HMDB04983</a> | 6213    | 100004284 |
| Propionylcarnitine (C3)                                      | Lipid        | Fatty Acid Metabolism (also BCAA Metabolism)            | 1.01 (0.93, 1.09) | 8.30E-01 | 9.47E-01 | LC/MS Pos Early | <a href="#">HMDB00824</a> | 107738  | 100001162 |
| PI (16:0/20:4)*                                              | Lipid        | Phosphatidylinositol (PI)                               | 1.01 (0.93, 1.09) | 8.34E-01 | 9.49E-01 | LC/MS Polar     | <a href="#">HMDB09789</a> |         | 100008993 |
| N-Acetylleucine                                              | Amino Acid   | Leucine, Isoleucine and Valine Metabolism               | 1.01 (0.94, 1.09) | 8.35E-01 | 9.50E-01 | LC/MS Neg       | <a href="#">HMDB11756</a> | 70912   | 1082      |
| Lactate                                                      | Carbohydrate | Glycolysis, Gluconeogenesis, and Pyruvate Metabolism    | 1.01 (0.94, 1.08) | 8.37E-01 | 9.51E-01 | LC/MS Neg       | <a href="#">HMDB00190</a> | 612     | 482       |
| Hydroxy-N6,N6,N6-trimethyllysine*                            | Amino Acid   | Lysine Metabolism                                       | 1.01 (0.93, 1.10) | 8.39E-01 | 9.51E-01 | LC/MS Pos Early |                           |         | 100021123 |
| $\gamma$ -Glutamylleucine                                    | Peptide      | Gamma-glutamyl Amino Acid                               | 1.01 (0.93, 1.09) | 8.39E-01 | 9.51E-01 | LC/MS Neg       | <a href="#">HMDB11171</a> | 151023  | 1268      |
| Piperine                                                     | Xenobiotics  | Food Component/Plant                                    | 0.99 (0.92, 1.07) | 8.42E-01 | 9.51E-01 | LC/MS Pos Late  | <a href="#">HMDB29377</a> | 638024  | 100001267 |
| 3-Hydroxyadipate*                                            | Lipid        | Fatty Acid, Dicarboxylate                               | 0.99 (0.92, 1.07) | 8.43E-01 | 9.51E-01 | LC/MS Polar     | <a href="#">HMDB00345</a> | 151913  | 100004396 |
| Spermine                                                     | Amino Acid   | Polyamine Metabolism                                    | 0.99 (0.92, 1.07) | 8.43E-01 | 9.51E-01 | LC/MS Pos Early | <a href="#">HMDB01256</a> | 1103    | 507       |
| Orotidine                                                    | Nucleotide   | Pyrimidine Metabolism, Orotate containing               | 0.99 (0.91, 1.08) | 8.44E-01 | 9.51E-01 | LC/MS Polar     | <a href="#">HMDB00788</a> | 92751   | 100001416 |
| 2,3-Dihydroxyisovalerate                                     | Xenobiotics  | Food Component/Plant                                    | 1.01 (0.93, 1.09) | 8.45E-01 | 9.51E-01 | LC/MS Polar     | <a href="#">HMDB12141</a> | 677     | 100002417 |
| S-Carboxyethylcysteine                                       | Amino Acid   | Methionine, Cysteine, SAM and Taurine Metabolism        | 0.99 (0.92, 1.07) | 8.47E-01 | 9.52E-01 | LC/MS Pos Early |                           |         | 100021530 |
| Myristate (14:0)                                             | Lipid        | Long Chain Saturated Fatty Acid                         | 0.99 (0.92, 1.07) | 8.52E-01 | 9.56E-01 | LC/MS Neg       | <a href="#">HMDB00806</a> | 11005   | 519       |

|                                                  |                        |                                                         |                   |          |          |                 |                           |          |           |
|--------------------------------------------------|------------------------|---------------------------------------------------------|-------------------|----------|----------|-----------------|---------------------------|----------|-----------|
| 5-Dodecenoate (12:1n7)                           | Lipid                  | Medium Chain Fatty Acid                                 | 1.01 (0.94, 1.08) | 8.53E-01 | 9.56E-01 | LC/MS Neg       | <a href="#">HMDB00529</a> | 5312378  | 100001232 |
| Oleoyl-linOleoyl-glycerol (18:1/18:2) [2]        | Lipid                  | Diacylglycerol                                          | 0.99 (0.92, 1.07) | 8.54E-01 | 9.56E-01 | LC/MS Pos Late  | <a href="#">HMDB07219</a> |          | 100002990 |
| γ-tocopherol/β-tocopherol                        | Cofactors and Vitamins | Tocopherol Metabolism                                   | 0.99 (0.92, 1.07) | 8.57E-01 | 9.59E-01 | LC/MS Pos Late  |                           |          | 100008998 |
| N6,N6-Dimethyllysine                             | Amino Acid             | Lysine Metabolism                                       | 0.99 (0.92, 1.07) | 8.61E-01 | 9.61E-01 | LC/MS Pos Early | <a href="#">HMDB13287</a> | 193344   | 100020417 |
| 2S,3R-Dihydroxybutyrate                          | Lipid                  | Fatty Acid, Dihydroxy                                   | 0.99 (0.92, 1.07) | 8.63E-01 | 9.61E-01 | LC/MS Polar     | <a href="#">HMDB02453</a> | 10964471 | 100002284 |
| Taurochenodeoxycholate                           | Lipid                  | Primary Bile Acid Metabolism                            | 1.01 (0.93, 1.09) | 8.63E-01 | 9.61E-01 | LC/MS Neg       | <a href="#">HMDB00951</a> | 387316   | 1629      |
| Nervonoylcarnitine (C24:1)*                      | Lipid                  | Fatty Acid Metabolism (Acyl Carnitine, Monounsaturated) | 0.99 (0.92, 1.07) | 8.64E-01 | 9.61E-01 | LC/MS Pos Late  |                           |          | 100015846 |
| N1-Methylinosine                                 | Nucleotide             | Purine Metabolism, (Hypo)Xanthine/Inosine containing    | 1.01 (0.93, 1.09) | 8.65E-01 | 9.61E-01 | LC/MS Pos Early | <a href="#">HMDB02721</a> | 65095    | 100001409 |
| Cysteinylglycine disulfide*                      | Amino Acid             | Glutathione Metabolism                                  | 1.01 (0.93, 1.09) | 8.67E-01 | 9.61E-01 | LC/MS Pos Early | <a href="#">HMDB00709</a> |          | 100002466 |
| Linoleoyl-arachidonoyl-glycerol (18:2/20:4) [2]* | Lipid                  | Diacylglycerol                                          | 0.99 (0.92, 1.07) | 8.68E-01 | 9.61E-01 | LC/MS Pos Late  |                           |          | 100010923 |
| Cysteine s-sulfate                               | Amino Acid             | Methionine, Cysteine, SAM and Taurine Metabolism        | 1.01 (0.93, 1.09) | 8.68E-01 | 9.61E-01 | LC/MS Polar     | <a href="#">HMDB00731</a> | 115015   | 100000808 |
| Isovalerylcarnitine (C5)                         | Amino Acid             | Leucine, Isoleucine and Valine Metabolism               | 1.01 (0.93, 1.08) | 8.69E-01 | 9.61E-01 | LC/MS Pos Early | <a href="#">HMDB00688</a> | 6426851  | 100001393 |
| 10-Undecenoate (11:1n1)                          | Lipid                  | Medium Chain Fatty Acid                                 | 0.99 (0.92, 1.07) | 8.70E-01 | 9.61E-01 | LC/MS Neg       | <a href="#">HMDB33724</a> | 14891    | 100001197 |
| γ-Glutamyl-α-lysine                              | Peptide                | Gamma-glutamyl Amino Acid                               | 0.99 (0.92, 1.08) | 8.71E-01 | 9.61E-01 | LC/MS Pos Early |                           | 65254    | 100010901 |
| 3-Hydroxydodecanedioate*                         | Lipid                  | Fatty Acid, Dicarboxylate                               | 0.99 (0.92, 1.07) | 8.75E-01 | 9.63E-01 | LC/MS Neg       | <a href="#">HMDB00413</a> | 16663321 | 100001454 |
| LysoPC (16:1)*                                   | Lipid                  | Lysophospholipid                                        | 0.99 (0.92, 1.07) | 8.76E-01 | 9.63E-01 | LC/MS Neg       | <a href="#">HMDB10383</a> |          | 100001561 |
| Octadecanedioylcarnitine (C18-DC)*               | Lipid                  | Fatty Acid Metabolism (Acyl Carnitine, Dicarboxylate)   | 1.01 (0.93, 1.09) | 8.81E-01 | 9.64E-01 | LC/MS Pos Late  |                           |          | 100005998 |
| Indolelactate                                    | Amino Acid             | Tryptophan Metabolism                                   | 1.01 (0.93, 1.09) | 8.82E-01 | 9.64E-01 | LC/MS Neg       | <a href="#">HMDB00671</a> | 92904    | 100000463 |
| PC (16:0/16:1)*                                  | Lipid                  | Phosphatidylcholine (PC)                                | 1.01 (0.93, 1.09) | 8.82E-01 | 9.64E-01 | LC/MS Pos Late  |                           |          | 100008984 |
| Linoleoyl-arachidonoyl-glycerol (18:2/20:4) [1]* | Lipid                  | Diacylglycerol                                          | 0.99 (0.92, 1.07) | 8.83E-01 | 9.64E-01 | LC/MS Pos Late  |                           |          | 100010922 |
| Oleoyl-arachidonoyl-glycerol (18:1/20:4) [1]*    | Lipid                  | Diacylglycerol                                          | 0.99 (0.92, 1.07) | 8.86E-01 | 9.64E-01 | LC/MS Pos Late  |                           |          | 100010936 |
| Heptenedioate (C7:1-DC)*                         | Lipid                  | Fatty Acid, Dicarboxylate                               | 1.01 (0.93, 1.08) | 8.87E-01 | 9.64E-01 | LC/MS Polar     |                           |          | 100019981 |
| 2-Hydroxybutyrate/2-hydroxyisobutyrate           | Amino Acid             | Glutathione Metabolism                                  | 1.01 (0.93, 1.09) | 8.89E-01 | 9.64E-01 | LC/MS Polar     |                           |          | 100008928 |
| Valine                                           | Amino Acid             | Leucine, Isoleucine and Valine Metabolism               | 1.01 (0.93, 1.08) | 8.90E-01 | 9.64E-01 | LC/MS Neg       | <a href="#">HMDB00883</a> | 6287     | 566       |
| 1-Methyl-5-imidazoleacetate                      | Amino Acid             | Histidine Metabolism                                    | 1.01 (0.93, 1.08) | 8.90E-01 | 9.64E-01 | LC/MS Pos Early | <a href="#">HMDB04988</a> | 6451814  | 100002910 |
| N-Palmitoylserine                                | Lipid                  | Endocannabinoid                                         | 0.99 (0.92, 1.07) | 8.90E-01 | 9.64E-01 | LC/MS Neg       |                           | 6453686  | 100015640 |
| Leucine                                          | Amino Acid             | Leucine, Isoleucine and Valine Metabolism               | 1.01 (0.93, 1.09) | 8.91E-01 | 9.64E-01 | LC/MS Pos Early |                           | 6106     | 397       |
| Myristoleoylcarnitine (C14:1)*                   | Lipid                  | Fatty Acid Metabolism (Acyl Carnitine, Monounsaturated) | 0.99 (0.92, 1.07) | 8.91E-01 | 9.64E-01 | LC/MS Pos Late  |                           | 90659872 | 100006051 |
| Ectoine                                          | Xenobiotics            | Chemical                                                | 1.00 (0.92, 1.07) | 8.96E-01 | 9.64E-01 | LC/MS Pos Early |                           | 126041   | 100001635 |
| 1-Carboxyethyltyrosine                           | Amino Acid             | Tyrosine Metabolism                                     | 1.00 (0.92, 1.07) | 8.96E-01 | 9.64E-01 | LC/MS Neg       |                           |          | 100020421 |
| γ-Glutamylphenylalanine                          | Peptide                | Gamma-glutamyl Amino Acid                               | 0.99 (0.92, 1.08) | 8.97E-01 | 9.64E-01 | LC/MS Neg       | <a href="#">HMDB00594</a> | 111299   | 100000491 |
| Phenylpyruvate                                   | Amino Acid             | Phenylalanine Metabolism                                | 1.01 (0.93, 1.09) | 8.97E-01 | 9.64E-01 | LC/MS Neg       | <a href="#">HMDB00205</a> | 997      | 241       |

|                                               |                        |                                                   |                   |          |          |                 |                           |         |           |
|-----------------------------------------------|------------------------|---------------------------------------------------|-------------------|----------|----------|-----------------|---------------------------|---------|-----------|
| 1,6-Anhydroglucose                            | Xenobiotics            | Food Component/Plant                              | 1.00 (0.93, 1.07) | 8.98E-01 | 9.64E-01 | LC/MS Polar     | <a href="#">HMDB00640</a> | 2724705 | 100000939 |
| 17 $\alpha$ -Hydroxypregnanolone glucuronide  | Lipid                  | Pregnenolone Steroids                             | 1.01 (0.93, 1.09) | 8.99E-01 | 9.64E-01 | LC/MS Neg       |                           |         | 100005418 |
| Palmitoleate (16:1n7)                         | Lipid                  | Long Chain Monounsaturated Fatty Acid             | 1.00 (0.93, 1.08) | 9.00E-01 | 9.64E-01 | LC/MS Neg       | <a href="#">HMDB03229</a> | 445638  | 452       |
| N6-Succinyladenosine                          | Nucleotide             | Purine Metabolism, Adenine containing             | 0.99 (0.92, 1.08) | 9.01E-01 | 9.64E-01 | LC/MS Neg       | <a href="#">HMDB00912</a> | 165243  | 100001664 |
| Arginate*                                     | Amino Acid             | Urea cycle; Arginine and Proline Metabolism       | 1.00 (0.92, 1.07) | 9.03E-01 | 9.64E-01 | LC/MS Pos Early | <a href="#">HMDB03148</a> | 160437  | 100002769 |
| N2,N5-Diacetylornithine                       | Amino Acid             | Urea cycle; Arginine and Proline Metabolism       | 1.00 (0.93, 1.09) | 9.04E-01 | 9.64E-01 | LC/MS Neg       |                           | 65977   | 100004575 |
| Hydroquinone sulfate                          | Xenobiotics            | Drug - Topical Agents                             | 1.00 (0.93, 1.08) | 9.06E-01 | 9.64E-01 | LC/MS Neg       | <a href="#">HMDB02434</a> | 161220  | 100001604 |
| cis-3,4-Methyleneheptanoate                   | Lipid                  | Fatty Acid, Branched                              | 1.00 (0.93, 1.07) | 9.06E-01 | 9.64E-01 | LC/MS Neg       |                           |         | 100021727 |
| N2-Acetyllysine                               | Amino Acid             | Lysine Metabolism                                 | 1.00 (0.92, 1.07) | 9.07E-01 | 9.64E-01 | LC/MS Polar     | <a href="#">HMDB00446</a> | 92907   | 100001721 |
| Docosadienoate (22:2n6)                       | Lipid                  | Long Chain Polyunsaturated Fatty Acid (n3 and n6) | 1.00 (0.92, 1.07) | 9.10E-01 | 9.64E-01 | LC/MS Neg       | <a href="#">HMDB61714</a> | 5282807 | 100001182 |
| 2-Methoxyhydroquinone sulfate (2)             | Xenobiotics            | Benzoate Metabolism                               | 1.00 (0.94, 1.08) | 9.10E-01 | 9.64E-01 | LC/MS Neg       |                           |         | 100021840 |
| Methyl-4-hydroxybenzoate sulfate              | Xenobiotics            | Benzoate Metabolism                               | 1.00 (0.92, 1.07) | 9.11E-01 | 9.64E-01 | LC/MS Neg       |                           |         | 100006116 |
| 4-Vinylphenol sulfate                         | Xenobiotics            | Benzoate Metabolism                               | 1.00 (0.93, 1.07) | 9.12E-01 | 9.64E-01 | LC/MS Neg       | <a href="#">HMDB62775</a> | 6426766 | 100001755 |
| 3-Methylglutaryl carnitine (2)                | Amino Acid             | Leucine, Isoleucine and Valine Metabolism         | 1.00 (0.93, 1.08) | 9.14E-01 | 9.64E-01 | LC/MS Pos Early | HMDB00552                 | 128145  | 100005850 |
| $\gamma$ -CEHC glucuronide*                   | Cofactors and Vitamins | Tocopherol Metabolism                             | 1.00 (0.93, 1.08) | 9.14E-01 | 9.64E-01 | LC/MS Neg       |                           |         | 100004243 |
| EDTA                                          | Xenobiotics            | Chemical                                          | 1.00 (0.93, 1.09) | 9.15E-01 | 9.64E-01 | LC/MS Neg       | <a href="#">HMDB15109</a> | 6049    | 100001002 |
| 1-Palmitoleoylglycerol (16:1)*                | Lipid                  | Monoacylglycerol                                  | 1.00 (0.92, 1.07) | 9.16E-01 | 9.64E-01 | LC/MS Neg       |                           |         | 100008952 |
| $\alpha$ -Ketoglutarate                       | Energy                 | TCA Cycle                                         | 1.00 (0.92, 1.08) | 9.17E-01 | 9.64E-01 | LC/MS Polar     | <a href="#">HMDB00208</a> | 51      | 93        |
| Lysoglycerol (20:4)                           | Lipid                  | Monoacylglycerol                                  | 1.00 (0.93, 1.08) | 9.17E-01 | 9.64E-01 | LC/MS Neg       | <a href="#">HMDB11549</a> | 5282281 | 100001433 |
| Pipecolate                                    | Amino Acid             | Lysine Metabolism                                 | 1.00 (0.93, 1.08) | 9.19E-01 | 9.64E-01 | LC/MS Neg       | <a href="#">HMDB00070</a> | 849     | 1025      |
| Dihomo-linoleate (20:2n6)                     | Lipid                  | Long Chain Polyunsaturated Fatty Acid (n3 and n6) | 1.00 (0.92, 1.07) | 9.20E-01 | 9.64E-01 | LC/MS Neg       | <a href="#">HMDB05060</a> | 6439848 | 1231      |
| 1,3,7-Trimethylurate                          | Xenobiotics            | Xanthine Metabolism                               | 1.00 (0.92, 1.08) | 9.21E-01 | 9.64E-01 | LC/MS Neg       | <a href="#">HMDB02123</a> | 79437   | 100001397 |
| Uridine                                       | Nucleotide             | Pyrimidine Metabolism, Uracil containing          | 1.00 (0.92, 1.07) | 9.23E-01 | 9.64E-01 | LC/MS Neg       | <a href="#">HMDB00296</a> | 6029    | 535       |
| Sulfate of piperine metabolite C18H21NO3 (3)* | Xenobiotics            | Food Component/Plant                              | 1.00 (0.93, 1.08) | 9.25E-01 | 9.64E-01 | LC/MS Neg       |                           |         | 100020504 |
| 3-Methylhistidine                             | Amino Acid             | Histidine Metabolism                              | 1.00 (0.93, 1.07) | 9.25E-01 | 9.64E-01 | LC/MS Neg       | <a href="#">HMDB00479</a> | 64969   | 100000042 |
| Tridecenedioate (C13:1-DC)*                   | Lipid                  | Fatty Acid, Dicarboxylate                         | 1.00 (0.93, 1.08) | 9.25E-01 | 9.64E-01 | LC/MS Neg       |                           |         | 100002199 |
| 3-Hydroxylaurate                              | Lipid                  | Fatty Acid, Monohydroxy                           | 1.00 (0.93, 1.07) | 9.26E-01 | 9.64E-01 | LC/MS Neg       | <a href="#">HMDB00387</a> | 94216   | 100001112 |
| Sulfate*                                      | Xenobiotics            | Chemical                                          | 1.00 (0.92, 1.07) | 9.26E-01 | 9.64E-01 | LC/MS Neg       | <a href="#">HMDB01448</a> | 1118    | 100002528 |
| Sucrose                                       | Carbohydrate           | Disaccharides and Oligosaccharides                | 1.00 (0.93, 1.08) | 9.26E-01 | 9.64E-01 | LC/MS Polar     | <a href="#">HMDB00258</a> | 5988    | 935       |
| 3-Indoleglyoxylic acid                        | Xenobiotics            | Food Component/Plant                              | 1.00 (0.93, 1.07) | 9.36E-01 | 9.73E-01 | LC/MS Neg       |                           | 73863   | 100020372 |
| Spermidine                                    | Amino Acid             | Polyamine Metabolism                              | 1.00 (0.93, 1.07) | 9.45E-01 | 9.81E-01 | LC/MS Pos Early | <a href="#">HMDB01257</a> | 1102    | 50        |
| Lysine                                        | Amino Acid             | Lysine Metabolism                                 | 1.00 (0.93, 1.08) | 9.48E-01 | 9.83E-01 | LC/MS Pos Early | <a href="#">HMDB00182</a> | 5962    | 407       |
| 1-Carboxyethylphenylalanine                   | Amino Acid             | Phenylalanine Metabolism                          | 1.00 (0.93, 1.08) | 9.51E-01 | 9.84E-01 | LC/MS Neg       |                           |         | 100020419 |

|                                               |             |                                                   |                   |          |          |                 |                           |          |           |
|-----------------------------------------------|-------------|---------------------------------------------------|-------------------|----------|----------|-----------------|---------------------------|----------|-----------|
| 2-Aminoheptanoate                             | Lipid       | Fatty Acid, Amino                                 | 1.00 (0.93, 1.08) | 9.51E-01 | 9.84E-01 | LC/MS Pos Early |                           | 227939   | 100004542 |
| PI (16:0/18:2)                                | Lipid       | Phosphatidylinositol (PI)                         | 1.00 (0.92, 1.08) | 9.52E-01 | 9.84E-01 | LC/MS Polar     | <a href="#">HMDB09784</a> |          | 1528      |
| Docosapentaenoate (n6 DPA; 22:5n6)            | Lipid       | Long Chain Polyunsaturated Fatty Acid (n3 and n6) | 1.00 (0.93, 1.08) | 9.54E-01 | 9.84E-01 | LC/MS Neg       | <a href="#">HMDB01976</a> | 6441454  | 100001580 |
| PI (16:0/18:1)*                               | Lipid       | Phosphatidylinositol (PI)                         | 1.00 (0.93, 1.08) | 9.54E-01 | 9.84E-01 | LC/MS Polar     | <a href="#">HMDB09783</a> |          | 100009066 |
| Butyrylcarnitine (C4)                         | Lipid       | Fatty Acid Metabolism (also BCAA Metabolism)      | 1.00 (0.93, 1.08) | 9.59E-01 | 9.85E-01 | LC/MS Pos Early | <a href="#">HMDB02013</a> | 439829   | 100001054 |
| Oleoyl-linOleoyl-glycerol (18:1/18:2) [1]     | Lipid       | Diacylglycerol                                    | 1.00 (0.93, 1.08) | 9.60E-01 | 9.85E-01 | LC/MS Pos Late  | <a href="#">HMDB07219</a> |          | 100002989 |
| Caprate (10:0)                                | Lipid       | Medium Chain Fatty Acid                           | 1.00 (0.93, 1.07) | 9.60E-01 | 9.85E-01 | LC/MS Neg       | <a href="#">HMDB00511</a> | 2969     | 888       |
| Adenosine 5'-monophosphate (AMP)              | Nucleotide  | Purine Metabolism, Adenine containing             | 1.00 (0.93, 1.08) | 9.61E-01 | 9.85E-01 | LC/MS Neg       | <a href="#">HMDB00045</a> | 6083     | 209       |
| Pro-hydroxy-pro                               | Amino Acid  | Urea cycle; Arginine and Proline Metabolism       | 1.00 (0.92, 1.08) | 9.62E-01 | 9.85E-01 | LC/MS Pos Early | <a href="#">HMDB06695</a> | 11673055 | 100001167 |
| 3-Hydroxymyristate                            | Lipid       | Fatty Acid, Monohydroxy                           | 1.00 (0.93, 1.08) | 9.64E-01 | 9.85E-01 | LC/MS Neg       |                           | 16064    | 100000882 |
| Oleoyl-arachidonoyl-glycerol (18:1/20:4) [2]* | Lipid       | Diacylglycerol                                    | 1.00 (0.93, 1.08) | 9.64E-01 | 9.85E-01 | LC/MS Pos Late  |                           |          | 100010937 |
| Indoleacetylglutamine                         | Amino Acid  | Tryptophan Metabolism                             | 1.00 (0.92, 1.08) | 9.65E-01 | 9.85E-01 | LC/MS Neg       | <a href="#">HMDB13240</a> | 25200879 | 100001731 |
| 2,6-Dihydroxybenzoic acid                     | Xenobiotics | Drug - Topical Agents                             | 1.00 (0.93, 1.08) | 9.68E-01 | 9.87E-01 | LC/MS Neg       | <a href="#">HMDB13676</a> | 9338     | 100020837 |
| Isoleucine                                    | Amino Acid  | Leucine, Isoleucine and Valine Metabolism         | 1.00 (0.93, 1.08) | 9.70E-01 | 9.88E-01 | LC/MS Pos Early | <a href="#">HMDB00172</a> | 6306     | 376       |
| 16-Hydroxypalmitate                           | Lipid       | Fatty Acid, Monohydroxy                           | 1.00 (0.93, 1.07) | 9.70E-01 | 9.88E-01 | LC/MS Neg       | <a href="#">HMDB06294</a> | 10466    | 100002953 |
| N-Acetylputrescine                            | Amino Acid  | Polyamine Metabolism                              | 1.00 (0.92, 1.08) | 9.74E-01 | 9.90E-01 | LC/MS Pos Early | <a href="#">HMDB02064</a> | 122356   | 192       |
| PC (18:0/22:6)                                | Lipid       | Phosphatidylcholine (PC)                          | 1.00 (0.93, 1.08) | 9.75E-01 | 9.90E-01 | LC/MS Pos Late  |                           |          | 100008916 |
| 3-Hydroxybutyrate (BHBA)                      | Lipid       | Ketone Bodies                                     | 1.00 (0.93, 1.08) | 9.79E-01 | 9.91E-01 | LC/MS Pos Early | <a href="#">HMDB00357</a> | 441      | 254       |
| PC (14:0/16:0)                                | Lipid       | Phosphatidylcholine (PC)                          | 1.00 (0.93, 1.08) | 9.79E-01 | 9.91E-01 | LC/MS Pos Late  | <a href="#">HMDB07869</a> | 129657   | 100000672 |
| N6-Acetylysine                                | Amino Acid  | Lysine Metabolism                                 | 1.00 (0.93, 1.08) | 9.80E-01 | 9.91E-01 | LC/MS Neg       | <a href="#">HMDB00206</a> | 92832    | 100001734 |
| Glycochenodeoxycholate 3-sulfate              | Lipid       | Primary Bile Acid Metabolism                      | 1.00 (0.92, 1.08) | 9.83E-01 | 9.93E-01 | LC/MS Neg       |                           |          | 100006641 |
| cis-3,4-Methyleneheptanoylcarnitine           | Lipid       | Fatty Acid Metabolism (Acyl Carnitine, Hydroxy)   | 1.00 (0.93, 1.08) | 9.86E-01 | 9.94E-01 | LC/MS Neg       |                           |          | 100021728 |
| Deoxycholic acid 12-sulfate*                  | Lipid       | Secondary Bile Acid Metabolism                    | 1.00 (0.93, 1.08) | 9.87E-01 | 9.94E-01 | LC/MS Neg       |                           |          | 100021712 |
| Glycerol                                      | Lipid       | Glycerolipid Metabolism                           | 1.00 (0.93, 1.08) | 9.89E-01 | 9.94E-01 | LC/MS Neg       | <a href="#">HMDB00131</a> | 753      | 1254      |
| Hexadecenedioate (C16:1-DC)*                  | Lipid       | Fatty Acid, Dicarboxylate                         | 1.00 (0.93, 1.08) | 9.90E-01 | 9.94E-01 | LC/MS Neg       |                           |          | 100019975 |
| N,N-Dimethylalanine                           | Amino Acid  | Alanine and Aspartate Metabolism                  | 1.00 (0.93, 1.08) | 9.92E-01 | 9.94E-01 | LC/MS Pos Early |                           | 5488191  | 100020371 |
| 2-Ooilyglycerol (18:1)                        | Lipid       | Monoacylglycerol                                  | 1.00 (0.93, 1.08) | 9.93E-01 | 9.94E-01 | LC/MS Neg       | <a href="#">HMDB11537</a> | 5319879  | 100000943 |
| (S)-3-Hydroxybutyrylcarnitine                 | Lipid       | Fatty Acid Metabolism (Acyl Carnitine, Hydroxy)   | 1.00 (0.93, 1.08) | 9.93E-01 | 9.94E-01 | LC/MS Pos Early |                           |          | 100009271 |
| Histidine betaine (hercynine)*                | Xenobiotics | Food Component/Plant                              | 1.00 (0.93, 1.08) | 9.93E-01 | 9.94E-01 | LC/MS Pos Early |                           | 3083620  | 100004059 |
| Kynurenine                                    | Amino Acid  | Tryptophan Metabolism                             | 1.00 (0.93, 1.08) | 9.98E-01 | 9.98E-01 | LC/MS Pos Early | <a href="#">HMDB00684</a> | 161166   | 100000265 |

\*Models were adjusted for age, race, education, family history of breast cancer, age at menarche, oral contraceptive use, postmenopausal hormone use, parity and age at first birth.

**Supplemental Table S2.** Results of analyses to define metabolite blocks and lead metabolites associated with breast cancer based on the heierarchical heat map shown in Figure S1.

| Original Breast Cancer Association |        |                                                |                          |          |          |        | Round 1 - Adjust for Lead |                          |          | Round 2 - Adjust for new lead |        |                           |        |        |                          |          |              |
|------------------------------------|--------|------------------------------------------------|--------------------------|----------|----------|--------|---------------------------|--------------------------|----------|-------------------------------|--------|---------------------------|--------|--------|--------------------------|----------|--------------|
| Block                              | Number | Metabolite                                     | RR (95% CI) <sup>†</sup> | P        | FDR      | Lead # | Lead R                    | RR (95% CI) <sup>†</sup> | P        | Final Block?                  | Number | Metabolite                | Lead # | Lead R | RR (95% CI) <sup>†</sup> | P        | Final Block? |
| A                                  | 1      | 21-Hydroxypregnenolone disulfate               | 1.13 (1.04, 1.22)        | 2.90E-03 | 1.14E-01 |        | 0.866                     | 1.05 (0.90, 1.23)        | 5.51E-01 | Yes                           |        |                           |        |        |                          |          |              |
| A                                  | 2      | Androstenediol (3β,17β) disulfate (2)          | 1.13 (1.05, 1.22)        | 1.86E-03 | 1.03E-01 |        | 1.000                     | -                        | -        |                               |        |                           |        |        |                          |          |              |
| A                                  | 3      | Androstenediol (3α,17α) monosulfate (2)        | 1.11 (1.03, 1.20)        | 8.15E-03 | 1.41E-01 |        | 0.683                     | 1.04 (0.94, 1.15)        | 4.78E-01 |                               |        |                           |        |        |                          |          |              |
| A                                  | 4      | Pregnenolone sulfate                           | 1.11 (1.03, 1.20)        | 9.72E-03 | 1.60E-01 |        | 0.659                     | 1.04 (0.94, 1.16)        | 4.22E-01 |                               |        |                           |        |        |                          |          |              |
| A                                  | 5      | Andro steroid monosulfate C19H28O6S (1)*       | 1.13 (1.04, 1.22)        | 2.58E-03 | 1.13E-01 | 8      | 0.670                     | 1.07 (0.97, 1.19)        | 1.86E-01 |                               |        |                           |        |        |                          |          |              |
| A                                  | 6      | 16α-Hydroxy DHEA 3-sulfate                     | 1.11 (1.03, 1.20)        | 7.15E-03 | 1.34E-01 |        | 0.685                     | 1.05 (0.94, 1.17)        | 3.64E-01 |                               |        |                           |        |        |                          |          |              |
| A                                  | 7      | Androstenediol (3β,17β) monosulfate (1)        | 1.11 (1.02, 1.19)        | 1.08E-02 | 1.67E-01 |        | 0.745                     | 1.03 (0.92, 1.15)        | 6.52E-01 |                               |        |                           |        |        |                          |          |              |
| A                                  | 8      | <b>Dehydroepiandrosterone sulfate (DHEA-S)</b> | 1.11 (1.02, 1.20)        | 1.35E-02 | 1.94E-01 |        | 0.827                     | 0.99 (0.86, 1.15)        | 9.22E-01 |                               |        |                           |        |        |                          |          |              |
| A                                  | 9      | Androstenediol (3β,17β) disulfate (1)          | 1.11 (1.03, 1.20)        | 5.99E-03 | 1.24E-01 |        | 0.731                     | 1.04 (0.94, 1.16)        | 4.42E-01 |                               |        |                           |        |        |                          |          |              |
| B                                  | 10     | <b>(2,4 or 2,5)-Dimethylphenol sulfate</b>     | 1.12 (1.04, 1.20)        | 4.09E-03 | 1.15E-01 |        | 1.000                     | -                        | -        | Separate                      |        |                           |        |        |                          |          |              |
| B                                  | 11     | Syringol sulfate                               | 1.12 (1.04, 1.21)        | 4.23E-03 | 1.15E-01 | 10     | 0.424                     | 1.09 (1.00, 1.18)        | 4.51E-02 | Separate                      |        |                           |        |        |                          |          |              |
| C                                  | 12     | 3-Hydroxypyridine glucuronide                  | 1.12 (1.04, 1.20)        | 3.47E-03 | 1.14E-01 |        | 0.726                     | 1.03 (0.93, 1.15)        | 5.81E-01 | Yes                           |        |                           |        |        |                          |          |              |
| C                                  | 13     | Catechol glucuronide                           | 1.10 (1.02, 1.19)        | 8.85E-03 | 1.51E-01 | 15     | 0.720                     | 1.01 (0.91, 1.12)        | 8.57E-01 |                               |        |                           |        |        |                          |          |              |
| C                                  | 14     | 3-Ethylcatechol sulfate (2)                    | 1.11 (1.04, 1.20)        | 3.34E-03 | 1.14E-01 |        | 0.871                     | 0.98 (0.85, 1.13)        | 8.12E-01 |                               |        |                           |        |        |                          |          |              |
| C                                  | 15     | <b>3-Methyl catechol sulfate (2)</b>           | 1.14 (1.06, 1.23)        | 4.76E-04 | 3.81E-02 |        | 1.000                     | -                        | -        |                               |        |                           |        |        |                          |          |              |
| D                                  | 16     | LysoPE (18:2)*                                 | 0.88 (0.82, 0.94)        | 4.60E-04 | 3.81E-02 |        | 0.778                     | 1.00 (0.88, 1.12)        | 9.37E-01 | Yes                           |        |                           |        |        |                          |          |              |
| D                                  | 17     | LysoPE (18:1)                                  | 0.87 (0.81, 0.94)        | 2.23E-04 | 3.42E-02 |        | 0.672                     | 0.95 (0.87, 1.05)        | 3.25E-01 |                               |        |                           |        |        |                          |          |              |
| D                                  | 18     | LysoPE (18:0)                                  | 0.91 (0.84, 0.98)        | 1.05E-02 | 1.66E-01 |        | 0.532                     | 0.99 (0.91, 1.08)        | 7.81E-01 |                               |        |                           |        |        |                          |          |              |
| D                                  | 19     | LysoPC (18:2)                                  | 0.87 (0.81, 0.94)        | 2.81E-04 | 3.49E-02 |        | 0.790                     | 0.99 (0.88, 1.12)        | 8.97E-01 |                               |        |                           |        |        |                          |          |              |
| D                                  | 20     | LysoPC (18:1)                                  | 0.90 (0.83, 0.96)        | 3.01E-03 | 1.14E-01 |        | 0.656                     | 1.00 (0.91, 1.10)        | 9.82E-01 |                               |        |                           |        |        |                          |          |              |
| D                                  | 21     | LysoPC (18:3)*                                 | 0.87 (0.81, 0.94)        | 4.83E-04 | 3.81E-02 | 25     | 0.624                     | 0.95 (0.86, 1.05)        | 2.97E-01 |                               |        |                           |        |        |                          |          |              |
| D                                  | 22     | PI (18:0/18:1)*                                | 0.90 (0.83, 0.97)        | 5.25E-03 | 1.24E-01 |        | 0.566                     | 0.99 (0.90, 1.08)        | 7.57E-01 |                               |        |                           |        |        |                          |          |              |
| D                                  | 23     | PI (18:0/18:2)                                 | 0.90 (0.84, 0.97)        | 6.18E-03 | 1.24E-01 |        | 0.671                     | 1.03 (0.93, 1.15)        | 5.64E-01 |                               |        |                           |        |        |                          |          |              |
| D                                  | 24     | PC (18:2/18:3)*                                | 0.85 (0.79, 0.91)        | 1.58E-05 | 6.87E-03 |        | 0.811                     | 0.91 (0.80, 1.04)        | 1.53E-01 |                               |        |                           |        |        |                          |          |              |
| D                                  | 25     | <b>PC (18:2/18:2)</b>                          | 0.85 (0.80, 0.92)        | 1.19E-05 | 6.87E-03 |        | 1.000                     | -                        | -        |                               |        |                           |        |        |                          |          |              |
| D                                  | 26     | PE (18:2/18:2)*                                | 0.90 (0.84, 0.97)        | 5.99E-03 | 1.24E-01 |        | 0.613                     | 0.99 (0.90, 1.09)        | 8.95E-01 |                               |        |                           |        |        |                          |          |              |
| D                                  | 27     | PE (18:1/18:2)*                                | 0.91 (0.85, 0.98)        | 1.34E-02 | 1.94E-01 |        | 0.608                     | 1.01 (0.92, 1.11)        | 7.78E-01 |                               |        |                           |        |        |                          |          |              |
| E                                  | 29     | 2-Hydroxysebacate                              | 0.89 (0.83, 0.96)        | 1.89E-03 | 1.03E-01 |        | 0.595                     | 0.96 (0.88, 1.05)        | 3.61E-01 |                               | 29     | 2-Hydroxysebacate         | 30     | 0.74   | 0.97 (0.87, 1.08)        | 5.41E-01 | Yes          |
| E                                  | 30     | 2-Hydroxydecanoate                             | 0.87 (0.81, 0.94)        | 2.37E-04 | 3.42E-02 |        | 0.484                     | 0.92 (0.85, 1.00)        | 4.88E-02 |                               | 30     | <b>2-Hydroxydecanoate</b> |        | 1.0    | -                        | -        |              |
| E                                  | 31     | 12,13-DiHOME                                   | 0.89 (0.83, 0.96)        | 2.61E-03 | 1.13E-01 | 33     | 0.473                     | 0.94 (0.87, 1.03)        | 1.89E-01 | Yes                           |        |                           |        |        |                          |          |              |
| E                                  | 32     | Undecanedioate (C11-DC)                        | 0.91 (0.84, 0.97)        | 8.01E-03 | 1.41E-01 |        | 0.608                     | 0.98 (0.90, 1.08)        | 7.06E-01 |                               |        |                           |        |        |                          |          |              |
| E                                  | 33     | <b>Azelate (C9-DC)</b>                         | 0.87 (0.81, 0.93)        | 1.17E-04 | 3.38E-02 |        | 1.000                     | -                        | -        |                               |        |                           |        |        |                          |          |              |
| E                                  | 34     | Docosadioate (C22-DC)                          | 0.90 (0.83, 0.97)        | 4.77E-03 | 1.24E-01 |        | 0.389                     | 0.95 (0.87, 1.03)        | 1.83E-01 |                               |        |                           |        |        |                          |          |              |
| F                                  | 35     | Sphinganine-1-phosphate                        | 0.91 (0.85, 0.97)        | 6.07E-03 | 1.24E-01 |        | 0.438                     | 0.95 (0.88, 1.03)        | 2.03E-01 | Yes                           |        |                           |        |        |                          |          |              |
| F                                  | 36     | Sphinganine                                    | 0.91 (0.85, 0.98)        | 1.10E-02 | 1.67E-01 |        | 0.153                     | 0.93 (0.87, 1.00)        | 5.36E-02 |                               |        |                           |        |        |                          |          |              |
| F                                  | 37     | LysoPE (O-18:0)*                               | 0.91 (0.84, 0.98)        | 9.94E-03 | 1.60E-01 |        | 0.487                     | 0.96 (0.89, 1.05)        | 3.85E-01 |                               |        |                           |        |        |                          |          |              |
| F                                  | 38     | Glycerophosphoethanolamine                     | 0.91 (0.84, 0.97)        | 7.09E-03 | 1.34E-01 |        | 0.388                     | 0.95 (0.88, 1.03)        | 2.18E-01 |                               |        |                           |        |        |                          |          |              |
| F                                  | 39     | PE (O-18:0/18:2)*                              | 0.89 (0.83, 0.96)        | 1.41E-03 | 9.40E-02 |        | 0.733                     | 0.96 (0.86, 1.07)        | 4.64E-01 |                               |        |                           |        |        |                          |          |              |
| F                                  | 40     | PE (O-16:0/18:2)*                              | 0.90 (0.84, 0.97)        | 6.30E-03 | 1.24E-01 |        | 0.662                     | 0.98 (0.89, 1.08)        | 7.21E-01 |                               |        |                           |        |        |                          |          |              |
| F                                  | 41     | PE (O-16:0/18:1)*                              | 0.90 (0.84, 0.97)        | 5.10E-03 | 1.24E-01 |        | 0.611                     | 0.97 (0.88, 1.06)        | 4.63E-01 |                               |        |                           |        |        |                          |          |              |
| F                                  | 42     | PE (O-18:0/18:1)                               | 0.90 (0.83, 0.96)        | 2.41E-03 | 1.13E-01 |        | 0.625                     | 0.96 (0.87, 1.05)        | 3.35E-01 |                               |        |                           |        |        |                          |          |              |
| F                                  | 43     | Arachidoylcarnitine (C20)*                     | 0.89 (0.82, 0.96)        | 3.55E-03 | 1.14E-01 |        | 0.399                     | 0.93 (0.86, 1.01)        | 1.04E-01 |                               |        |                           |        |        |                          |          |              |
| F                                  | 44     | <b>PC (O-16:0/18:2)*</b>                       | 0.87 (0.82, 0.94)        | 1.93E-04 | 3.42E-02 |        | 1.000                     | -                        | -        |                               |        |                           |        |        |                          |          |              |
| F                                  | 45     | PC (O-16:0/18:1)*                              | 0.88 (0.82, 0.94)        | 3.32E-04 | 3.60E-02 | 44     | 0.852                     | 0.95 (0.82, 1.10)        | 4.76E-01 |                               |        |                           |        |        |                          |          |              |
| F                                  | 46     | LysoPC (24:0)                                  | 0.90 (0.83, 0.97)        | 5.48E-03 | 1.24E-01 |        | 0.562                     | 0.96 (0.87, 1.05)        | 3.32E-01 |                               |        |                           |        |        |                          |          |              |
| F                                  | 47     | Asparagine                                     | 0.91 (0.84, 0.97)        | 8.05E-03 | 1.41E-01 |        | 0.553                     | 0.97 (0.89, 1.06)        | 5.04E-01 |                               |        |                           |        |        |                          |          |              |
| F                                  | 48     | Serine                                         | 0.89 (0.83, 0.96)        | 1.74E-03 | 1.03E-01 |        | 0.568                     | 0.94 (0.87, 1.03)        | 2.06E-01 |                               |        |                           |        |        |                          |          |              |
| F                                  | 49     | Glutamine                                      | 0.91 (0.85, 0.98)        | 1.37E-02 | 1.94E-01 |        | 0.575                     | 0.99 (0.90, 1.08)        | 7.49E-01 |                               |        |                           |        |        |                          |          |              |
| F                                  | 50     | PC (18:2/20:4n6)*                              | 0.90 (0.84, 0.97)        | 5.02E-03 | 1.24E-01 |        | 0.579                     | 0.97 (0.89, 1.06)        | 4.82E-01 |                               |        |                           |        |        |                          |          |              |
| F                                  | 51     | PC (18:0/18:2)*                                | 0.90 (0.84, 0.97)        | 3.75E-03 | 1.15E-01 |        | 0.650                     | 0.98 (0.89, 1.08)        | 6.70E-01 |                               |        |                           |        |        |                          |          |              |
| F                                  | 52     | SM (d18:1/24:0)                                | 0.91 (0.84, 0.97)        | 7.25E-03 | 1.34E-01 |        | 0.582                     | 0.97 (0.89, 1.06)        | 5.36E-01 |                               |        |                           |        |        |                          |          |              |
| F                                  | 53     | SM (d18:2/23:0, d18:1/23:1, d17:1/24:1)*       | 0.89 (0.83, 0.96)        | 2.31E-03 | 1.13E-01 |        | 0.608                     | 0.96 (0.87, 1.05)        | 3.80E-01 |                               |        |                           |        |        |                          |          |              |
| F                                  | 54     | SM (d18:1/22:1, d18:2/22:0, d16:1/24:1)*       | 0.90 (0.84, 0.96)        | 3.03E-03 | 1.14E-01 |        | 0.638                     | 0.97 (0.88, 1.07)        | 5.32E-01 |                               |        |                           |        |        |                          |          |              |
| F                                  | 55     | SM (d18:2/14:0, d18:1/14:1)*                   | 0.90 (0.84, 0.97)        | 5.89E-03 | 1.24E-01 |        | 0.411                     | 0.95 (0.88, 1.03)        | 2.33E-01 |                               |        |                           |        |        |                          |          |              |
| G                                  | 56     | N-Formylanthranilic acid                       | 0.89 (0.83, 0.96)        | 4.09E-03 | 1.15E-01 | 57     | 0.448                     | 0.93 (0.85, 1.02)        | 1.18E-01 | Yes                           |        |                           |        |        |                          |          |              |
| G                                  | 57     | <b>Phenylacetylglutamine</b>                   | 0.88 (0.81, 0.95)        | 1.11E-03 | 8.04E-02 |        | 1.000                     | -                        | -        |                               |        |                           |        |        |                          |          |              |
| H                                  | 59     | Octadecadienedioate (C18:2-DC)*                | 0.89 (0.83, 0.96)        | 4.13E-03 | 1.15E-01 | 61     | 0.430                     | 0.92 (0.85, 1.01)        | 6.53E-02 | Yes                           |        |                           |        |        |                          |          |              |
| H                                  | 60     | <b>S-Methylcysteine sulfoxide</b>              | 0.89 (0.83, 0.96)        | 3.56E-03 | 1.14E-01 |        | 1.000                     | -                        | -        |                               |        |                           |        |        |                          |          |              |

<sup>†</sup>Models were adjusted for age, race, education, family history of breast cancer, age at menarche, oral contraceptive use, postmenopausal hormone use, parity and age at first birth.

**Supplemental Table S3.** The influence of adjustment for BMI on the associations of the 61 metabolites associated with breast cancer at FDR<0.20.

| Metabolite                               | SUPER PATHWAY          | SUBPATHWAY                                                   | Multivariable† Adjusted |          |          | Multivariable† + BMI Adjusted |          |          |
|------------------------------------------|------------------------|--------------------------------------------------------------|-------------------------|----------|----------|-------------------------------|----------|----------|
|                                          |                        |                                                              | RR (95% CI)†            | P        | FDR      | RR (95% CI)†                  | P        | FDR      |
| PC (18:2/18:2)                           | Lipid                  | Phosphatidylcholine (PC)                                     | 0.85 (0.80, 0.92)       | 1.19E-05 | 6.87E-03 | 0.86 (0.80, 0.92)             | 3.97E-05 | 2.24E-02 |
| PC (18:2/18:3)*                          | Lipid                  | Phosphatidylcholine (PC)                                     | 0.85 (0.79, 0.91)       | 1.58E-05 | 6.87E-03 | 0.85 (0.79, 0.92)             | 5.17E-05 | 2.24E-02 |
| Azelate (C9-DC)                          | Lipid                  | Fatty Acid, Dicarboxylate                                    | 0.87 (0.81, 0.93)       | 1.17E-04 | 3.38E-02 | 0.87 (0.81, 0.93)             | 1.48E-04 | 4.28E-02 |
| PC (O-16:0/18:2)*                        | Lipid                  | Plasmalogen                                                  | 0.87 (0.82, 0.94)       | 1.93E-04 | 3.42E-02 | 0.88 (0.82, 0.95)             | 7.09E-04 | 8.79E-02 |
| LysoPE (18:1)                            | Lipid                  | Lysophospholipid                                             | 0.87 (0.81, 0.94)       | 2.23E-04 | 3.42E-02 | 0.88 (0.82, 0.95)             | 5.30E-04 | 8.11E-02 |
| 2-Hydroxydecanoate                       | Lipid                  | Fatty Acid, Monohydroxy                                      | 0.87 (0.81, 0.94)       | 2.37E-04 | 3.42E-02 | 0.88 (0.81, 0.95)             | 5.60E-04 | 8.11E-02 |
| LysoPC (18:2)                            | Lipid                  | Lysophospholipid                                             | 0.87 (0.81, 0.94)       | 2.81E-04 | 3.49E-02 | 0.88 (0.82, 0.95)             | 9.35E-04 | 9.51E-02 |
| PC (O-18:0/18:1)*                        | Lipid                  | Plasmalogen                                                  | 0.88 (0.82, 0.94)       | 3.32E-04 | 3.60E-02 | 0.88 (0.82, 0.95)             | 1.33E-03 | 9.87E-02 |
| LysoPE (18:2)*                           | Lipid                  | Lysophospholipid                                             | 0.88 (0.82, 0.94)       | 4.60E-04 | 3.81E-02 | 0.88 (0.82, 0.95)             | 1.14E-03 | 9.87E-02 |
| 3-Methyl catechol sulfate (2)            | Xenobiotics            | Benzoate Metabolism                                          | 1.14 (1.06, 1.23)       | 4.76E-04 | 3.81E-02 | 1.15 (1.07, 1.24)             | 2.62E-04 | 5.69E-02 |
| LysoPC (18:3)*                           | Lipid                  | Lysophospholipid                                             | 0.87 (0.81, 0.94)       | 4.83E-04 | 3.81E-02 | 0.88 (0.81, 0.95)             | 9.86E-04 | 9.51E-02 |
| Phenylacetylglutamine                    | Peptide                | Acetylated Peptides                                          | 0.88 (0.81, 0.95)       | 1.11E-03 | 8.04E-02 | 0.88 (0.82, 0.95)             | 1.36E-03 | 9.87E-02 |
| PE (O-18:0/18:2)*                        | Lipid                  | Plasmalogen                                                  | 0.89 (0.83, 0.96)       | 1.41E-03 | 9.40E-02 | 0.89 (0.83, 0.96)             | 2.93E-03 | 1.46E-01 |
| Serine                                   | Amino Acid             | Glycine, Serine and Threonine Metabolism                     | 0.89 (0.83, 0.96)       | 1.74E-03 | 1.03E-01 | 0.90 (0.83, 0.97)             | 4.74E-03 | 1.51E-01 |
| Androstenediol (3β,17β) disulfate (2)    | Lipid                  | Androgenic Steroids                                          | 1.13 (1.05, 1.22)       | 1.86E-03 | 1.03E-01 | 1.12 (1.04, 1.21)             | 3.37E-03 | 1.46E-01 |
| 2-Hydroxysebacate                        | Lipid                  | Fatty Acid, Dicarboxylate                                    | 0.89 (0.83, 0.96)       | 1.89E-03 | 1.03E-01 | 0.90 (0.83, 0.97)             | 3.67E-03 | 1.51E-01 |
| SM (d18:2/23:0, d18:1/23:1, d17:1/24:1)* | Lipid                  | Sphingomyelins                                               | 0.89 (0.83, 0.96)       | 2.31E-03 | 1.13E-01 | 0.89 (0.83, 0.96)             | 3.31E-03 | 1.46E-01 |
| PE (O-18:0/18:1)                         | Lipid                  | Plasmalogen                                                  | 0.90 (0.83, 0.96)       | 2.41E-03 | 1.13E-01 | 0.90 (0.84, 0.97)             | 4.33E-03 | 1.51E-01 |
| Andro steroid monosulfate C19H28O6S (1)* | Lipid                  | Androgenic Steroids                                          | 1.13 (1.04, 1.22)       | 2.58E-03 | 1.13E-01 | 1.12 (1.04, 1.21)             | 4.13E-03 | 1.51E-01 |
| 12,13-DiHOME                             | Lipid                  | Fatty Acid, Dihydroxy                                        | 0.89 (0.83, 0.96)       | 2.61E-03 | 1.13E-01 | 0.90 (0.83, 0.97)             | 4.86E-03 | 1.51E-01 |
| 21-Hydroxypregnenolone disulfate         | Lipid                  | Pregnenolone Steroids                                        | 1.13 (1.04, 1.22)       | 2.90E-03 | 1.14E-01 | 1.13 (1.04, 1.22)             | 3.20E-03 | 1.46E-01 |
| LysoPC (18:1)                            | Lipid                  | Lysophospholipid                                             | 0.90 (0.83, 0.96)       | 3.01E-03 | 1.14E-01 | 0.90 (0.84, 0.97)             | 8.17E-03 | 1.91E-01 |
| SM (d18:1/22:1, d18:2/22:0, d16:1/24:1)* | Lipid                  | Sphingomyelins                                               | 0.90 (0.84, 0.96)       | 3.03E-03 | 1.14E-01 | 0.90 (0.84, 0.97)             | 4.04E-03 | 1.51E-01 |
| 3-Ethylcatechol sulfate (2)              | Xenobiotics            | Food Component/Plant                                         | 1.11 (1.04, 1.20)       | 3.34E-03 | 1.14E-01 | 1.12 (1.04, 1.21)             | 2.00E-03 | 1.24E-01 |
| 3-Hydroxypyridineglucuronide             | Xenobiotics            | Chemical                                                     | 1.12 (1.04, 1.20)       | 3.47E-03 | 1.14E-01 | 1.12 (1.04, 1.21)             | 2.25E-03 | 1.30E-01 |
| Arachidoylcarnitine (C20)*               | Lipid                  | Fatty Acid Metabolism (Acyl Carnitine, Long Chain Saturated) | 0.89 (0.82, 0.96)       | 3.55E-03 | 1.14E-01 | 0.90 (0.83, 0.97)             | 7.80E-03 | 1.91E-01 |
| S-Methylcysteine sulfoxide               | Amino Acid             | Methionine, Cysteine, SAM and Taurine Metabolism             | 0.89 (0.83, 0.96)       | 3.56E-03 | 1.14E-01 | 0.90 (0.83, 0.97)             | 5.99E-03 | 1.79E-01 |
| PC (18:0/18:2)*                          | Lipid                  | Phosphatidylcholine (PC)                                     | 0.90 (0.84, 0.97)       | 3.75E-03 | 1.15E-01 | 0.91 (0.85, 0.97)             | 7.09E-03 | 1.91E-01 |
| (2,4 or 2,5)-Dimethylphenol sulfate      | Xenobiotics            | Food Component/Plant                                         | 1.12 (1.04, 1.20)       | 4.09E-03 | 1.15E-01 | 1.12 (1.04, 1.21)             | 2.85E-03 | 1.46E-01 |
| N-Formylanthranilic acid                 | Amino Acid             | Tryptophan Metabolism                                        | 0.89 (0.83, 0.96)       | 4.09E-03 | 1.15E-01 | 0.90 (0.83, 0.97)             | 7.44E-03 | 1.91E-01 |
| Octadecadienedioate (C18:2-DC)*          | Lipid                  | Fatty Acid, Dicarboxylate                                    | 0.89 (0.83, 0.96)       | 4.13E-03 | 1.15E-01 | 0.90 (0.83, 0.97)             | 8.48E-03 | 1.91E-01 |
| Syringol sulfate                         | Xenobiotics            | Food Component/Plant                                         | 1.12 (1.04, 1.21)       | 4.23E-03 | 1.15E-01 | 1.12 (1.04, 1.21)             | 4.63E-03 | 1.51E-01 |
| Docosadioate (C22-DC)                    | Lipid                  | Fatty Acid, Dicarboxylate                                    | 0.90 (0.83, 0.97)       | 4.77E-03 | 1.24E-01 | 0.90 (0.84, 0.97)             | 7.32E-03 | 1.91E-01 |
| PC (18:2/20:4n6)*                        | Lipid                  | Phosphatidylcholine (PC)                                     | 0.90 (0.84, 0.97)       | 5.02E-03 | 1.24E-01 | 0.91 (0.85, 0.98)             | 9.41E-03 | 1.91E-01 |
| PE (O-16:0/18:1)*                        | Lipid                  | Plasmalogen                                                  | 0.90 (0.84, 0.97)       | 5.10E-03 | 1.24E-01 | 0.91 (0.85, 0.98)             | 8.49E-03 | 1.91E-01 |
| PI (18:0/18:1)*                          | Lipid                  | Phosphatidylinositol (PI)                                    | 0.90 (0.83, 0.97)       | 5.25E-03 | 1.24E-01 | 0.90 (0.84, 0.98)             | 9.67E-03 | 1.91E-01 |
| LysoPC (24:0)                            | Lipid                  | Lysophospholipid                                             | 0.90 (0.83, 0.97)       | 5.48E-03 | 1.24E-01 | 0.91 (0.83, 0.98)             | 1.75E-02 | 2.49E-01 |
| Hippurate                                | Xenobiotics            | Benzoate Metabolism                                          | 0.90 (0.83, 0.97)       | 5.86E-03 | 1.24E-01 | 0.90 (0.83, 0.97)             | 9.15E-03 | 1.91E-01 |
| SM (d18:2/14:0, d18:1/14:1)*             | Lipid                  | Sphingomyelins                                               | 0.90 (0.84, 0.97)       | 5.89E-03 | 1.24E-01 | 0.89 (0.82, 0.96)             | 1.74E-03 | 1.17E-01 |
| Androstenediol (3β,17β) disulfate (1)    | Lipid                  | Androgenic Steroids                                          | 1.11 (1.03, 1.20)       | 5.99E-03 | 1.24E-01 | 1.10 (1.02, 1.19)             | 1.06E-02 | 2.01E-01 |
| PE (18:2/18:2)*                          | Lipid                  | Phosphatidylethanolamine (PE)                                | 0.90 (0.84, 0.97)       | 5.99E-03 | 1.24E-01 | 0.90 (0.84, 0.97)             | 8.69E-03 | 1.91E-01 |
| Sphinganine-1-phosphate                  | Lipid                  | Sphingolipid Synthesis                                       | 0.91 (0.85, 0.97)       | 6.07E-03 | 1.24E-01 | 0.92 (0.85, 0.98)             | 1.30E-02 | 2.06E-01 |
| PI (18:0/18:2)                           | Lipid                  | Phosphatidylinositol (PI)                                    | 0.90 (0.84, 0.97)       | 6.18E-03 | 1.24E-01 | 0.91 (0.84, 0.98)             | 1.01E-02 | 1.94E-01 |
| PE (O-16:0/18:2)*                        | Lipid                  | Plasmalogen                                                  | 0.90 (0.84, 0.97)       | 6.30E-03 | 1.24E-01 | 0.91 (0.84, 0.98)             | 9.68E-03 | 1.91E-01 |
| Glycerophosphoethanolamine               | Lipid                  | Phospholipid Metabolism                                      | 0.91 (0.84, 0.97)       | 7.09E-03 | 1.34E-01 | 0.91 (0.85, 0.98)             | 1.14E-02 | 2.06E-01 |
| 16α-Hydroxy DHEA 3-sulfate               | Lipid                  | Androgenic Steroids                                          | 1.11 (1.03, 1.20)       | 7.15E-03 | 1.34E-01 | 1.11 (1.02, 1.20)             | 1.30E-02 | 2.06E-01 |
| SM (d18:1/24:0)                          | Lipid                  | Sphingomyelins                                               | 0.91 (0.84, 0.97)       | 7.25E-03 | 1.34E-01 | 0.91 (0.85, 0.98)             | 1.21E-02 | 2.06E-01 |
| Undecanedioate (C11-DC)                  | Lipid                  | Fatty Acid, Dicarboxylate                                    | 0.91 (0.84, 0.97)       | 8.01E-03 | 1.41E-01 | 0.91 (0.84, 0.98)             | 9.65E-03 | 1.91E-01 |
| Asparagine                               | Amino Acid             | Alanine and Aspartate Metabolism                             | 0.91 (0.84, 0.97)       | 8.05E-03 | 1.41E-01 | 0.92 (0.85, 0.99)             | 2.28E-02 | 2.76E-01 |
| Androstenediol (3α, 17α) monosulfate (2) | Lipid                  | Androgenic Steroids                                          | 1.11 (1.03, 1.20)       | 8.15E-03 | 1.41E-01 | 1.10 (1.02, 1.19)             | 1.16E-02 | 2.06E-01 |
| Catechol glucuronide                     | Amino Acid             | Tyrosine Metabolism                                          | 1.10 (1.02, 1.19)       | 8.85E-03 | 1.51E-01 | 1.11 (1.03, 1.20)             | 4.81E-03 | 1.51E-01 |
| Pregnenolone sulfate                     | Lipid                  | Pregnenolone Steroids                                        | 1.11 (1.03, 1.20)       | 9.72E-03 | 1.60E-01 | 1.12 (1.03, 1.21)             | 6.85E-03 | 1.91E-01 |
| 4-Guanidinobutanoate                     | Amino Acid             | Guanidine and Acetamido Metabolism                           | 0.91 (0.85, 0.98)       | 9.82E-03 | 1.60E-01 | 0.91 (0.85, 0.98)             | 1.41E-02 | 2.14E-01 |
| LysoPE (O-18:0)*                         | Lipid                  | Lysoplasmalogen                                              | 0.91 (0.84, 0.98)       | 9.94E-03 | 1.60E-01 | 0.91 (0.85, 0.99)             | 1.96E-02 | 2.55E-01 |
| LysoPE (18:0)                            | Lipid                  | Lysophospholipid                                             | 0.91 (0.84, 0.98)       | 1.05E-02 | 1.66E-01 | 0.91 (0.85, 0.98)             | 1.74E-02 | 2.49E-01 |
| Androstenediol (3β,17β) monosulfate (1)  | Lipid                  | Androgenic Steroids                                          | 1.11 (1.02, 1.19)       | 1.08E-02 | 1.67E-01 | 1.10 (1.02, 1.19)             | 1.82E-02 | 2.49E-01 |
| Sphinganine                              | Lipid                  | Sphingolipid Synthesis                                       | 0.91 (0.85, 0.98)       | 1.10E-02 | 1.67E-01 | 0.91 (0.85, 0.98)             | 8.55E-03 | 1.91E-01 |
| β-Cryptoxanthin                          | Cofactors and Vitamins | Vitamin A Metabolism                                         | 0.91 (0.84, 0.98)       | 1.33E-02 | 1.94E-01 | 0.92 (0.85, 1.00)             | 4.23E-02 | 3.37E-01 |
| PE (18:1/18:2)*                          | Lipid                  | Phosphatidylethanolamine (PE)                                | 0.91 (0.85, 0.98)       | 1.34E-02 | 1.94E-01 | 0.91 (0.85, 0.98)             | 1.69E-02 | 2.49E-01 |
| Dehydroepiandrosterone sulfate (DHEA-S)  | Lipid                  | Androgenic Steroids                                          | 1.11 (1.02, 1.20)       | 1.35E-02 | 1.94E-01 | 1.11 (1.02, 1.20)             | 1.25E-02 | 2.06E-01 |
| Glutamine                                | Amino Acid             | Glutamate Metabolism                                         | 0.91 (0.85, 0.98)       | 1.37E-02 | 1.94E-01 | 0.92 (0.86, 0.99)             | 2.73E-02 | 3.17E-01 |

†Models were adjusted for age, race, education, family history of breast cancer, age at menarche, oral contraceptive use, postmenopausal hormone use, parity and age at first birth.



**Supplemental Table S4.** Association of top 61 metabolites with premenopausal and postmenopausal breast cancer.

| Metabolite                               | Premenopausal<br>Cases N = 737 |          |          | Postmenopausal<br>Cases N = 882 |          |          | Heterogeneity<br>Estimate |
|------------------------------------------|--------------------------------|----------|----------|---------------------------------|----------|----------|---------------------------|
|                                          | RR (95% CI) <sup>†</sup>       | P        | FDR      | RR (95% CI) <sup>†</sup>        | P        | FDR      | P-interaction             |
| PC (18:2/18:2)                           | 0.87 (0.78, 0.97)              | 1.33E-02 | 8.18E-01 | 0.84 (0.77, 0.93)               | 4.93E-04 | 5.35E-02 | 5.86E-01                  |
| PC (18:2/18:3)*                          | 0.87 (0.77, 0.97)              | 1.14E-02 | 8.18E-01 | 0.85 (0.77, 0.95)               | 2.90E-03 | 1.01E-01 | 7.96E-01                  |
| Azelate (C9-DC)                          | 0.89 (0.80, 0.99)              | 2.69E-02 | 8.18E-01 | 0.83 (0.75, 0.92)               | 2.93E-04 | 5.35E-02 | 2.09E-01                  |
| PC (O-16:0/18:2)*                        | 0.88 (0.79, 0.99)              | 2.79E-02 | 8.18E-01 | 0.87 (0.79, 0.95)               | 3.68E-03 | 1.14E-01 | 7.89E-01                  |
| LysoPE (18:1)                            | 0.88 (0.79, 0.99)              | 3.33E-02 | 8.18E-01 | 0.84 (0.76, 0.92)               | 3.07E-04 | 5.35E-02 | 2.90E-01                  |
| 2-Hydroxydecanoate                       | 0.86 (0.76, 0.96)              | 7.77E-03 | 8.18E-01 | 0.88 (0.79, 0.97)               | 1.12E-02 | 1.62E-01 | 6.56E-01                  |
| LysoPC (18:2)                            | 0.85 (0.76, 0.96)              | 6.19E-03 | 8.18E-01 | 0.87 (0.79, 0.96)               | 5.40E-03 | 1.27E-01 | 7.25E-01                  |
| PC (O-16:0/18:1)*                        | 0.92 (0.82, 1.03)              | 1.37E-01 | 9.24E-01 | 0.85 (0.77, 0.93)               | 5.76E-04 | 5.56E-02 | 1.23E-01                  |
| LysoPE (18:2)*                           | 0.86 (0.76, 0.96)              | 7.66E-03 | 8.18E-01 | 0.87 (0.79, 0.96)               | 5.59E-03 | 1.28E-01 | 7.80E-01                  |
| 3-Methyl catechol sulfate (2)            | 1.14 (1.02, 1.28)              | 2.34E-02 | 8.18E-01 | 1.17 (1.06, 1.30)               | 2.85E-03 | 1.01E-01 | 5.63E-01                  |
| LysoPC (18:3)*                           | 0.86 (0.77, 0.97)              | 1.22E-02 | 8.18E-01 | 0.88 (0.79, 0.98)               | 1.93E-02 | 2.08E-01 | 6.49E-01                  |
| Phenylacetylglutamine                    | 0.91 (0.80, 1.02)              | 1.14E-01 | 9.24E-01 | 0.85 (0.77, 0.94)               | 2.39E-03 | 1.01E-01 | 2.61E-01                  |
| PE (O-18:0/18:2)*                        | 0.89 (0.79, 1.00)              | 5.61E-02 | 9.04E-01 | 0.89 (0.81, 0.98)               | 1.88E-02 | 2.06E-01 | 9.90E-01                  |
| Serine                                   | 0.93 (0.83, 1.04)              | 2.23E-01 | 9.24E-01 | 0.85 (0.77, 0.93)               | 8.85E-04 | 6.40E-02 | 5.42E-02                  |
| Androstenediol (3β,17β) disulfate (2)    | 1.02 (0.91, 1.15)              | 6.85E-01 | 9.56E-01 | 1.22 (1.09, 1.36)               | 4.44E-04 | 5.35E-02 | <b>1.28E-03</b>           |
| 2-Hydroxysebacate                        | 0.89 (0.80, 1.00)              | 4.06E-02 | 8.48E-01 | 0.87 (0.79, 0.97)               | 8.52E-03 | 1.41E-01 | 7.19E-01                  |
| SM (d18:2/23:0, d18:1/23:1, d17:1/24:1)* | 0.89 (0.79, 1.00)              | 5.93E-02 | 9.20E-01 | 0.91 (0.82, 1.00)               | 4.86E-02 | 3.10E-01 | 7.06E-01                  |
| PE (O-18:0/18:1)                         | 0.93 (0.82, 1.05)              | 2.37E-01 | 9.24E-01 | 0.87 (0.79, 0.95)               | 2.13E-03 | 1.00E-01 | 1.91E-01                  |
| Andro steroid monosulfate C19H28O6S (1)* | 1.06 (0.95, 1.18)              | 3.31E-01 | 9.24E-01 | 1.18 (1.05, 1.32)               | 4.60E-03 | 1.23E-01 | <b>4.64E-02</b>           |
| 12,13-DiHOME                             | 0.88 (0.78, 0.99)              | 3.44E-02 | 8.18E-01 | 0.88 (0.79, 0.98)               | 1.49E-02 | 1.89E-01 | 9.82E-01                  |
| 21-Hydroxypregnenolone disulfate         | 1.05 (0.94, 1.17)              | 3.76E-01 | 9.24E-01 | 1.21 (1.07, 1.37)               | 2.19E-03 | 1.00E-01 | <b>1.04E-02</b>           |
| LysoPC (18:1)                            | 0.94 (0.84, 1.05)              | 2.66E-01 | 9.24E-01 | 0.86 (0.78, 0.95)               | 1.97E-03 | 1.00E-01 | 8.46E-02                  |
| SM (d18:1/22:1, d18:2/22:0, d16:1/24:1)* | 0.90 (0.80, 1.01)              | 8.14E-02 | 9.24E-01 | 0.91 (0.82, 1.00)               | 4.22E-02 | 3.01E-01 | 8.85E-01                  |
| 3-Ethylcatechol sulfate (2)              | 1.11 (0.99, 1.25)              | 7.39E-02 | 9.24E-01 | 1.15 (1.04, 1.27)               | 5.27E-03 | 1.27E-01 | 4.96E-01                  |
| 3-Hydroxypyridine glucuronide            | 1.11 (0.99, 1.25)              | 7.24E-02 | 9.24E-01 | 1.12 (1.01, 1.24)               | 2.50E-02 | 2.35E-01 | 8.64E-01                  |
| Arachidoylcarnitine (C20)*               | 0.90 (0.79, 1.03)              | 1.14E-01 | 9.24E-01 | 0.88 (0.79, 0.97)               | 1.06E-02 | 1.62E-01 | 5.99E-01                  |
| S-Methylcysteine sulfoxide               | 0.92 (0.81, 1.04)              | 1.90E-01 | 9.24E-01 | 0.88 (0.80, 0.98)               | 1.61E-02 | 1.94E-01 | 4.69E-01                  |
| PC (18:0/18:2)*                          | 0.87 (0.78, 0.98)              | 1.62E-02 | 8.18E-01 | 0.92 (0.84, 1.01)               | 8.89E-02 | 4.22E-01 | 2.50E-01                  |
| (2,4 or 2,5)-Dimethylphenol sulfate      | 1.15 (1.03, 1.29)              | 1.73E-02 | 8.18E-01 | 1.14 (1.03, 1.27)               | 1.38E-02 | 1.84E-01 | 8.83E-01                  |
| N-Formylanthranilic acid                 | 0.95 (0.84, 1.07)              | 3.94E-01 | 9.38E-01 | 0.86 (0.78, 0.96)               | 4.78E-03 | 1.23E-01 | 7.67E-02                  |
| Octadecadienedioate (C18:2-DC)*          | 0.97 (0.86, 1.10)              | 6.60E-01 | 9.52E-01 | 0.85 (0.76, 0.95)               | 4.03E-03 | 1.21E-01 | <b>1.67E-02</b>           |
| Syringol sulfate                         | 1.12 (0.99, 1.27)              | 7.67E-02 | 9.24E-01 | 1.15 (1.03, 1.28)               | 1.16E-02 | 1.65E-01 | 6.14E-01                  |
| Docosadioate (C22-DC)                    | 0.91 (0.81, 1.01)              | 8.40E-02 | 9.24E-01 | 0.87 (0.79, 0.97)               | 1.11E-02 | 1.62E-01 | 4.87E-01                  |
| PC (18:2/20:4n6)*                        | 0.92 (0.82, 1.03)              | 1.34E-01 | 9.24E-01 | 0.90 (0.82, 0.99)               | 2.76E-02 | 2.49E-01 | 7.78E-01                  |
| PE (O-16:0/18:1)*                        | 0.94 (0.83, 1.07)              | 3.39E-01 | 9.24E-01 | 0.88 (0.80, 0.96)               | 4.81E-03 | 1.23E-01 | 1.67E-01                  |
| PI (18:0/18:1)*                          | 0.89 (0.80, 1.00)              | 4.59E-02 | 8.48E-01 | 0.89 (0.80, 0.99)               | 2.70E-02 | 2.49E-01 | 9.64E-01                  |
| LysoPC (24:0)                            | 0.95 (0.84, 1.07)              | 3.60E-01 | 9.24E-01 | 0.87 (0.78, 0.96)               | 8.28E-03 | 1.41E-01 | 1.15E-01                  |
| Hippurate                                | 0.90 (0.80, 1.02)              | 8.95E-02 | 9.24E-01 | 0.90 (0.81, 1.00)               | 4.58E-02 | 3.06E-01 | 9.08E-01                  |
| SM (d18:2/14:0, d18:1/14:1)*             | 0.88 (0.78, 0.99)              | 3.33E-02 | 8.18E-01 | 0.94 (0.85, 1.03)               | 1.91E-01 | 5.72E-01 | 2.62E-01                  |
| Androstenediol (3β,17β) disulfate (1)    | 1.02 (0.90, 1.15)              | 7.82E-01 | 9.64E-01 | 1.20 (1.08, 1.33)               | 4.10E-04 | 5.35E-02 | 1.60E-03                  |
| PE (18:2/18:2)*                          | 0.88 (0.79, 0.99)              | 2.86E-02 | 8.18E-01 | 0.90 (0.81, 0.99)               | 3.86E-02 | 2.97E-01 | 7.56E-01                  |
| Sphinganine-1-phosphate                  | 0.94 (0.84, 1.05)              | 2.83E-01 | 9.24E-01 | 0.87 (0.80, 0.96)               | 4.58E-03 | 1.23E-01 | 1.50E-01                  |
| PI (18:0/18:2)                           | 0.88 (0.78, 0.99)              | 2.79E-02 | 8.18E-01 | 0.91 (0.83, 1.01)               | 8.45E-02 | 4.10E-01 | 4.58E-01                  |
| PE (O-16:0/18:2)*                        | 0.93 (0.82, 1.04)              | 1.90E-01 | 9.24E-01 | 0.91 (0.82, 1.00)               | 4.85E-02 | 3.10E-01 | 6.91E-01                  |
| Glycerophosphoethanolamine               | 0.93 (0.83, 1.04)              | 1.86E-01 | 9.24E-01 | 0.87 (0.79, 0.96)               | 6.01E-03 | 1.30E-01 | 2.54E-01                  |
| 16α-Hydroxy DHEA 3-sulfate               | 1.06 (0.95, 1.19)              | 2.88E-01 | 9.24E-01 | 1.14 (1.02, 1.28)               | 2.38E-02 | 2.32E-01 | 1.76E-01                  |
| SM (d18:1/24:0)                          | 0.92 (0.82, 1.05)              | 2.08E-01 | 9.24E-01 | 0.90 (0.82, 0.99)               | 3.36E-02 | 2.70E-01 | 6.66E-01                  |
| Undecanedioate (C11-DC)                  | 0.86 (0.78, 0.96)              | 5.26E-03 | 8.18E-01 | 0.91 (0.82, 1.02)               | 1.14E-01 | 4.65E-01 | 2.88E-01                  |
| Asparagine                               | 0.92 (0.82, 1.03)              | 1.44E-01 | 9.24E-01 | 0.88 (0.79, 0.97)               | 1.34E-02 | 1.84E-01 | 3.82E-01                  |
| Androstenediol (3α, 17α) monosulfate (2) | 1.00 (0.89, 1.11)              | 9.46E-01 | 9.89E-01 | 1.20 (1.07, 1.35)               | 1.81E-03 | 1.00E-01 | <b>5.51E-04</b>           |
| Catechol glucuronide                     | 1.09 (0.98, 1.22)              | 1.22E-01 | 9.24E-01 | 1.12 (1.02, 1.24)               | 2.44E-02 | 2.35E-01 | 5.73E-01                  |
| Pregnenolone sulfate                     | 1.04 (0.93, 1.16)              | 5.36E-01 | 9.52E-01 | 1.17 (1.03, 1.32)               | 1.37E-02 | 1.84E-01 | 3.06E-02                  |
| 4-Guanidinobutanoate                     | 0.94 (0.84, 1.05)              | 2.54E-01 | 9.24E-01 | 0.90 (0.81, 0.99)               | 3.25E-02 | 2.70E-01 | 4.26E-01                  |
| LysoPE (O-18:0)*                         | 0.90 (0.80, 1.01)              | 6.73E-02 | 9.24E-01 | 0.90 (0.81, 0.99)               | 3.74E-02 | 2.91E-01 | 9.72E-01                  |
| LysoPE (18:0)                            | 0.92 (0.82, 1.03)              | 1.26E-01 | 9.24E-01 | 0.88 (0.80, 0.98)               | 1.41E-02 | 1.86E-01 | 4.85E-01                  |
| Androstenediol (3β,17β) monosulfate (1)  | 0.99 (0.88, 1.11)              | 8.56E-01 | 9.72E-01 | 1.22 (1.09, 1.37)               | 4.19E-04 | 5.35E-02 | <b>7.09E-05</b>           |
| Sphinganine                              | 0.98 (0.88, 1.10)              | 7.66E-01 | 9.64E-01 | 0.87 (0.79, 0.96)               | 3.58E-03 | 1.14E-01 | <b>1.80E-02</b>           |
| β-Cryptoxanthin                          | 0.94 (0.83, 1.06)              | 3.24E-01 | 9.24E-01 | 0.90 (0.81, 1.00)               | 4.68E-02 | 3.08E-01 | 4.19E-01                  |
| PE (18:1/18:2)*                          | 0.92 (0.82, 1.02)              | 1.27E-01 | 9.24E-01 | 0.88 (0.79, 0.98)               | 1.73E-02 | 1.98E-01 | 4.04E-01                  |
| Dehydroepiandrosterone sulfate (DHEA-S)  | 1.00 (0.89, 1.12)              | 9.88E-01 | 9.97E-01 | 1.21 (1.07, 1.36)               | 1.94E-03 | 1.00E-01 | <b>9.79E-04</b>           |
| Glutamine                                | 0.90 (0.80, 1.01)              | 6.48E-02 | 9.24E-01 | 0.92 (0.83, 1.01)               | 8.42E-02 | 4.10E-01 | 7.23E-01                  |

<sup>†</sup>Models were adjusted for age, race, education, family history of breast cancer, age at menarche, oral contraceptive use, postmenopausal

**Supplemental Table S5.** Association of top 61 metabolites with ER+ and ER- breast cancer.

| Metabolite                               | ER+<br>N=1,410    |          |          | Cases | ER-<br>N=252      |          |          | Cases           | Heterogeneity<br>Estimate |
|------------------------------------------|-------------------|----------|----------|-------|-------------------|----------|----------|-----------------|---------------------------|
|                                          | RR (95% CI)†      | P        | FDR      |       | RR (95% CI)†      | P        | FDR      |                 |                           |
| PC (18:2/18:2)                           | 0.85 (0.79, 0.92) | 3.13E-05 | 2.08E-02 |       | 0.83 (0.73, 0.95) | 6.43E-03 | 5.58E-01 | 7.59E-01        |                           |
| PC (18:2/18:3)*                          | 0.85 (0.79, 0.92) | 5.79E-05 | 2.08E-02 |       | 0.82 (0.71, 0.94) | 4.65E-03 | 5.58E-01 | 6.59E-01        |                           |
| Azelaic acid (C9-DC)                     | 0.86 (0.80, 0.93) | 9.56E-05 | 2.08E-02 |       | 0.89 (0.77, 1.02) | 9.71E-02 | 8.36E-01 | 6.73E-01        |                           |
| PC (O-16:0/18:2)*                        | 0.87 (0.81, 0.94) | 2.12E-04 | 2.30E-02 |       | 0.88 (0.77, 1.01) | 7.53E-02 | 8.17E-01 | 8.85E-01        |                           |
| LysoPE (18:1)                            | 0.87 (0.80, 0.94) | 2.05E-04 | 2.30E-02 |       | 0.89 (0.77, 1.03) | 1.12E-01 | 8.68E-01 | 7.89E-01        |                           |
| 2-Hydroxydecanoate                       | 0.86 (0.79, 0.93) | 7.44E-05 | 2.08E-02 |       | 0.93 (0.80, 1.09) | 4.02E-01 | 9.97E-01 | 3.80E-01        |                           |
| LysoPC (18:2)                            | 0.87 (0.80, 0.93) | 1.84E-04 | 2.30E-02 |       | 0.90 (0.79, 1.04) | 1.59E-01 | 9.89E-01 | 6.72E-01        |                           |
| PC (O-16:0/18:1)*                        | 0.87 (0.81, 0.94) | 3.17E-04 | 3.06E-02 |       | 0.89 (0.77, 1.02) | 9.04E-02 | 8.36E-01 | 7.79E-01        |                           |
| LysoPE (18:2)*                           | 0.87 (0.81, 0.94) | 5.93E-04 | 3.96E-02 |       | 0.88 (0.77, 1.02) | 8.11E-02 | 8.20E-01 | 8.88E-01        |                           |
| 3-Methyl catechol sulfate (2)            | 1.16 (1.07, 1.25) | 1.72E-04 | 2.30E-02 |       | 1.04 (0.91, 1.18) | 5.78E-01 | 9.97E-01 | 1.57E-01        |                           |
| LysoPC (18:3)*                           | 0.88 (0.81, 0.95) | 1.83E-03 | 7.22E-02 |       | 0.82 (0.70, 0.95) | 7.16E-03 | 5.61E-01 | 4.22E-01        |                           |
| Phenylacetylglutamine                    | 0.88 (0.81, 0.96) | 2.25E-03 | 7.50E-02 |       | 0.88 (0.76, 1.02) | 8.22E-02 | 8.20E-01 | 1.00E+00        |                           |
| PE (O-18:0/18:2)*                        | 0.89 (0.82, 0.96) | 2.78E-03 | 8.33E-02 |       | 0.86 (0.75, 0.99) | 3.60E-02 | 6.51E-01 | 6.74E-01        |                           |
| Serine                                   | 0.88 (0.82, 0.95) | 1.39E-03 | 6.34E-02 |       | 0.90 (0.79, 1.03) | 1.31E-01 | 9.07E-01 | 7.72E-01        |                           |
| Androstenediol (3β,17β) disulfate (2)    | 1.16 (1.07, 1.26) | 3.81E-04 | 3.30E-02 |       | 0.96 (0.83, 1.11) | 5.89E-01 | 9.97E-01 | <b>2.61E-02</b> |                           |
| 2-Hydroxysebacate                        | 0.88 (0.81, 0.95) | 6.84E-04 | 3.96E-02 |       | 0.95 (0.83, 1.10) | 5.26E-01 | 9.97E-01 | 3.54E-01        |                           |
| SM (d18:2/23:0, d18:1/23:1, d17:1/24:1)* | 0.88 (0.82, 0.95) | 1.46E-03 | 6.34E-02 |       | 0.92 (0.79, 1.07) | 2.99E-01 | 9.97E-01 | 6.05E-01        |                           |
| PE (O-18:0/18:1)                         | 0.90 (0.84, 0.97) | 6.65E-03 | 1.36E-01 |       | 0.86 (0.74, 0.99) | 3.12E-02 | 6.24E-01 | 5.83E-01        |                           |
| Andro steroid monosulfate C19H28O6S (1)* | 1.14 (1.05, 1.23) | 1.71E-03 | 7.09E-02 |       | 1.05 (0.89, 1.22) | 5.75E-01 | 9.97E-01 | 3.61E-01        |                           |
| 12,13-DiHOME                             | 0.88 (0.81, 0.95) | 2.05E-03 | 7.42E-02 |       | 0.92 (0.80, 1.06) | 2.55E-01 | 9.97E-01 | 5.90E-01        |                           |
| 21-Hydroxypregnenolone disulfate         | 1.15 (1.06, 1.25) | 1.21E-03 | 5.84E-02 |       | 0.99 (0.85, 1.15) | 8.73E-01 | 9.97E-01 | 8.81E-02        |                           |
| LysoPC (18:1)                            | 0.89 (0.82, 0.96) | 2.57E-03 | 8.00E-02 |       | 0.91 (0.79, 1.05) | 1.88E-01 | 9.97E-01 | 7.89E-01        |                           |
| SM (d18:1/22:1, d18:2/22:0, d16:1/24:1)* | 0.88 (0.82, 0.95) | 1.06E-03 | 5.76E-02 |       | 0.96 (0.83, 1.12) | 5.96E-01 | 9.97E-01 | 3.07E-01        |                           |
| 3-Ethylcatechol sulfate (2)              | 1.14 (1.06, 1.23) | 6.55E-04 | 3.96E-02 |       | 1.00 (0.88, 1.15) | 9.66E-01 | 9.97E-01 | 9.34E-02        |                           |
| 3-Hydroxypyridine glucuronide            | 1.14 (1.06, 1.23) | 6.70E-04 | 3.96E-02 |       | 0.98 (0.85, 1.14) | 8.26E-01 | 9.97E-01 | 7.16E-02        |                           |
| Arachidoylcarnitine (C20)*               | 0.89 (0.82, 0.96) | 3.98E-03 | 1.05E-01 |       | 0.88 (0.75, 1.03) | 1.08E-01 | 8.54E-01 | 9.00E-01        |                           |
| S-Methylcysteine sulfoxide               | 0.90 (0.83, 0.97) | 9.11E-03 | 1.44E-01 |       | 0.80 (0.68, 0.95) | 8.69E-03 | 5.61E-01 | 2.11E-01        |                           |
| PC (18:0/18:2)*                          | 0.90 (0.84, 0.97) | 4.53E-03 | 1.10E-01 |       | 0.89 (0.79, 1.01) | 6.30E-02 | 7.62E-01 | 8.78E-01        |                           |
| (2,4 or 2,5)-Dimethylphenol sulfate      | 1.13 (1.05, 1.22) | 2.23E-03 | 7.50E-02 |       | 1.05 (0.92, 1.19) | 4.70E-01 | 9.97E-01 | 3.34E-01        |                           |
| N-Formylanthranilic acid                 | 0.90 (0.83, 0.97) | 8.28E-03 | 1.36E-01 |       | 0.86 (0.75, 0.98) | 2.87E-02 | 6.24E-01 | 5.65E-01        |                           |
| Octadecadienedioate (C18:2-DC)*          | 0.90 (0.83, 0.98) | 1.12E-02 | 1.50E-01 |       | 0.87 (0.74, 1.01) | 6.36E-02 | 7.62E-01 | 7.06E-01        |                           |
| Syringol sulfate                         | 1.13 (1.04, 1.22) | 4.87E-03 | 1.10E-01 |       | 1.08 (0.97, 1.22) | 1.60E-01 | 9.89E-01 | 5.25E-01        |                           |
| Docosadiate (C22-DC)                     | 0.89 (0.82, 0.96) | 3.59E-03 | 9.74E-02 |       | 0.94 (0.82, 1.09) | 4.15E-01 | 9.97E-01 | 5.10E-01        |                           |
| PC (18:2/20:4n6)*                        | 0.91 (0.84, 0.97) | 7.93E-03 | 1.36E-01 |       | 0.89 (0.78, 1.01) | 6.41E-02 | 7.62E-01 | 7.68E-01        |                           |
| PE (O-16:0/18:1)*                        | 0.91 (0.84, 0.98) | 9.62E-03 | 1.46E-01 |       | 0.88 (0.77, 1.01) | 7.52E-02 | 8.17E-01 | 6.74E-01        |                           |
| PI (18:0/18:1)*                          | 0.92 (0.85, 0.99) | 2.72E-02 | 2.22E-01 |       | 0.81 (0.70, 0.93) | 3.23E-03 | 4.68E-01 | 1.22E-01        |                           |
| LysoPC (24:0)                            | 0.89 (0.82, 0.97) | 5.55E-03 | 1.18E-01 |       | 0.89 (0.77, 1.03) | 1.16E-01 | 8.73E-01 | 1.00E+00        |                           |
| Hippurate                                | 0.89 (0.82, 0.96) | 4.15E-03 | 1.06E-01 |       | 0.91 (0.78, 1.07) | 2.43E-01 | 9.97E-01 | 8.05E-01        |                           |
| SM (d18:2/14:0, d18:1/14:1)*             | 0.91 (0.84, 0.98) | 1.25E-02 | 1.57E-01 |       | 0.88 (0.76, 1.01) | 6.18E-02 | 7.62E-01 | 6.85E-01        |                           |
| Androstenediol (3β,17β) disulfate (1)    | 1.15 (1.06, 1.25) | 5.00E-04 | 3.95E-02 |       | 0.87 (0.76, 1.01) | 6.93E-02 | 8.13E-01 | 8.77E-04        |                           |
| PE (18:2/18:2)*                          | 0.89 (0.83, 0.97) | 4.83E-03 | 1.10E-01 |       | 0.93 (0.81, 1.07) | 2.97E-01 | 9.97E-01 | 5.89E-01        |                           |
| Sphinganine-1-phosphate                  | 0.90 (0.84, 0.97) | 5.07E-03 | 1.10E-01 |       | 0.92 (0.81, 1.05) | 2.12E-01 | 9.97E-01 | 7.72E-01        |                           |
| PI (18:0/18:2)                           | 0.91 (0.84, 0.98) | 1.58E-02 | 1.76E-01 |       | 0.85 (0.74, 0.98) | 2.10E-02 | 5.90E-01 | 4.04E-01        |                           |
| PE (O-16:0/18:2)*                        | 0.90 (0.83, 0.97) | 7.89E-03 | 1.36E-01 |       | 0.90 (0.78, 1.03) | 1.22E-01 | 8.82E-01 | 1.00E+00        |                           |
| Glycerophosphoethanolamine               | 0.91 (0.84, 0.98) | 1.30E-02 | 1.59E-01 |       | 0.86 (0.76, 0.99) | 3.11E-02 | 6.24E-01 | 4.69E-01        |                           |
| 16α-Hydroxy DHEA 3-sulfate               | 1.12 (1.04, 1.22) | 5.04E-03 | 1.10E-01 |       | 1.03 (0.88, 1.21) | 6.71E-01 | 9.97E-01 | 3.57E-01        |                           |
| SM (d18:1/24:0)                          | 0.90 (0.84, 0.97) | 6.80E-03 | 1.36E-01 |       | 0.90 (0.79, 1.04) | 1.57E-01 | 9.89E-01 | 1.00E+00        |                           |
| Undecanedioate (C11-DC)                  | 0.90 (0.83, 0.97) | 6.96E-03 | 1.36E-01 |       | 0.93 (0.80, 1.08) | 3.55E-01 | 9.97E-01 | 7.04E-01        |                           |
| Asparagine                               | 0.90 (0.83, 0.97) | 4.87E-03 | 1.10E-01 |       | 0.93 (0.80, 1.07) | 3.02E-01 | 9.97E-01 | 6.97E-01        |                           |
| Androstenediol (3α, 17α) monosulfate (2) | 1.12 (1.03, 1.21) | 7.79E-03 | 1.36E-01 |       | 1.05 (0.90, 1.22) | 5.41E-01 | 9.97E-01 | 4.62E-01        |                           |
| Catechol glucuronide                     | 1.13 (1.05, 1.22) | 1.20E-03 | 5.84E-02 |       | 0.95 (0.82, 1.09) | 4.55E-01 | 9.97E-01 | <b>3.45E-02</b> |                           |
| Pregnenolone sulfate                     | 1.12 (1.03, 1.22) | 7.61E-03 | 1.36E-01 |       | 1.01 (0.87, 1.18) | 8.89E-01 | 9.97E-01 | 2.45E-01        |                           |
| 4-Guanidinobutanoate                     | 0.91 (0.85, 0.98) | 1.67E-02 | 1.76E-01 |       | 0.92 (0.80, 1.05) | 2.08E-01 | 9.97E-01 | 8.89E-01        |                           |
| LysoPE (O-18:0)*                         | 0.91 (0.84, 0.99) | 2.25E-02 | 2.04E-01 |       | 0.86 (0.75, 0.98) | 2.36E-02 | 6.02E-01 | 4.80E-01        |                           |
| LysoPE (18:0)                            | 0.92 (0.85, 0.99) | 2.86E-02 | 2.25E-01 |       | 0.86 (0.75, 0.98) | 2.82E-02 | 6.24E-01 | 3.91E-01        |                           |
| Androstenediol (3β,17β) monosulfate (1)  | 1.14 (1.05, 1.23) | 1.99E-03 | 7.42E-02 |       | 0.93 (0.80, 1.07) | 3.24E-01 | 9.97E-01 | 1.59E-02        |                           |
| Sphinganine                              | 0.92 (0.86, 0.99) | 3.31E-02 | 2.42E-01 |       | 0.82 (0.71, 0.93) | 2.97E-03 | 4.68E-01 | 1.38E-01        |                           |
| β-Cryptoxanthin                          | 0.89 (0.82, 0.96) | 3.59E-03 | 9.74E-02 |       | 0.98 (0.85, 1.12) | 7.48E-01 | 9.97E-01 | 2.35E-01        |                           |
| PE (18:1/18:2)*                          | 0.90 (0.84, 0.98) | 1.09E-02 | 1.49E-01 |       | 0.94 (0.81, 1.08) | 3.57E-01 | 9.97E-01 | 6.01E-01        |                           |
| Dehydroepiandrosterone sulfate (DHEA-S)  | 1.12 (1.03, 1.22) | 7.57E-03 | 1.36E-01 |       | 1.00 (0.86, 1.17) | 9.96E-01 | 1.00E+00 | 2.06E-01        |                           |
| Glutamine                                | 0.91 (0.84, 0.98) | 1.03E-02 | 1.49E-01 |       | 0.93 (0.81, 1.07) | 2.92E-01 | 9.97E-01 | 7.89E-01        |                           |

†Models were adjusted for age, race, education, family history of breast cancer, age at menarche, oral contraceptive use, postmenopausal

**Supplemental Table S6.** Associations of top metabolites with breast cancer stratified by time between blood draw and diagnosis.

| Metabolite                               | 0 - <= 1.5 years  |          |          | >1.5 years - 3 years |          |          | > 3 years         |          |          | Heterogeneity Estimate |
|------------------------------------------|-------------------|----------|----------|----------------------|----------|----------|-------------------|----------|----------|------------------------|
|                                          | Cases N = 606     |          |          | Cases N = 534        |          |          | Cases N = 549     |          |          |                        |
|                                          | RR (95% CI)†      | P        | FDR      | RR (95% CI)†         | P        | FDR      | RR (95% CI)†      | P        | FDR      |                        |
| PC (18:2/18:2)                           | 0.86 (0.78, 0.94) | 1.51E-03 | 7.80E-02 | 0.87 (0.80, 0.95)    | 2.97E-03 | 6.44E-01 | 0.90 (0.80, 1.02) | 9.42E-02 | 9.10E-01 | 3.60E-01               |
| PC (18:2/18:3)*                          | 0.92 (0.84, 1.01) | 9.15E-02 | 3.68E-01 | 0.85 (0.77, 0.94)    | 1.61E-03 | 6.44E-01 | 0.85 (0.75, 0.97) | 1.61E-02 | 7.18E-01 | 7.08E-01               |
| Azelate (C9-DC)                          | 0.95 (0.87, 1.04) | 2.81E-01 | 5.71E-01 | 0.92 (0.83, 1.02)    | 1.12E-01 | 8.15E-01 | 0.82 (0.73, 0.92) | 1.09E-03 | 6.21E-01 | 1.74E-01               |
| PC (O-16:0/18:2)*                        | 0.91 (0.83, 1.00) | 5.47E-02 | 3.03E-01 | 0.88 (0.81, 0.97)    | 8.75E-03 | 8.15E-01 | 0.88 (0.78, 0.99) | 3.77E-02 | 8.84E-01 | 7.93E-01               |
| LysoPE (18:1)                            | 0.87 (0.79, 0.95) | 3.27E-03 | 1.01E-01 | 0.92 (0.84, 1.01)    | 9.82E-02 | 8.15E-01 | 0.89 (0.79, 1.00) | 5.68E-02 | 9.10E-01 | 8.20E-01               |
| 2-Hydroxydecanoate                       | 0.89 (0.81, 0.99) | 2.35E-02 | 2.34E-01 | 0.95 (0.86, 1.05)    | 3.12E-01 | 9.08E-01 | 0.85 (0.75, 0.96) | 1.15E-02 | 7.18E-01 | 2.95E-01               |
| LysoPC (18:2)                            | 0.88 (0.80, 0.97) | 8.39E-03 | 1.63E-01 | 0.90 (0.82, 0.99)    | 3.01E-02 | 8.15E-01 | 0.90 (0.79, 1.02) | 8.82E-02 | 9.10E-01 | 6.80E-01               |
| PC (O-16:0/18:1)*                        | 0.92 (0.84, 1.01) | 7.65E-02 | 3.44E-01 | 0.88 (0.80, 0.96)    | 4.43E-03 | 7.68E-01 | 0.88 (0.78, 0.99) | 3.44E-02 | 8.77E-01 | 9.81E-01               |
| LysoPE (18:2)*                           | 0.90 (0.82, 0.99) | 3.44E-02 | 2.73E-01 | 0.91 (0.83, 1.00)    | 5.46E-02 | 8.15E-01 | 0.87 (0.77, 0.99) | 2.94E-02 | 8.51E-01 | 6.79E-01               |
| 3-Methyl catechol sulfate (2)            | 1.08 (0.99, 1.18) | 7.60E-02 | 3.44E-01 | 1.05 (0.95, 1.16)    | 3.25E-01 | 9.08E-01 | 1.21 (1.07, 1.37) | 2.15E-03 | 6.21E-01 | 6.83E-01               |
| LysoPC (18:3)*                           | 0.88 (0.79, 0.97) | 1.17E-02 | 1.97E-01 | 0.91 (0.83, 1.01)    | 6.64E-02 | 8.15E-01 | 0.88 (0.77, 1.00) | 4.98E-02 | 9.10E-01 | 4.14E-01               |
| Phenylacetylglutamine                    | 0.88 (0.80, 0.97) | 1.33E-02 | 1.97E-01 | 0.90 (0.82, 0.99)    | 3.86E-02 | 8.15E-01 | 0.89 (0.78, 1.02) | 9.22E-02 | 9.10E-01 | 8.02E-01               |
| PE (O-18:0/18:2)*                        | 0.91 (0.83, 1.00) | 4.12E-02 | 2.79E-01 | 0.91 (0.83, 1.00)    | 4.46E-02 | 8.15E-01 | 0.91 (0.80, 1.02) | 1.07E-01 | 9.10E-01 | 8.41E-01               |
| Serine                                   | 0.91 (0.83, 1.00) | 3.87E-02 | 2.76E-01 | 0.91 (0.83, 1.00)    | 4.91E-02 | 8.15E-01 | 0.91 (0.81, 1.03) | 1.41E-01 | 9.11E-01 | 9.24E-01               |
| Androstenediol (3β,17β) disulfate (2)    | 1.04 (0.94, 1.15) | 4.09E-01 | 6.67E-01 | 1.09 (0.98, 1.20)    | 9.99E-02 | 8.15E-01 | 1.18 (1.04, 1.35) | 1.09E-02 | 7.18E-01 | 1.69E-01               |
| 2-Hydroxysebacate                        | 0.96 (0.87, 1.05) | 3.58E-01 | 6.34E-01 | 0.94 (0.85, 1.03)    | 1.97E-01 | 8.57E-01 | 0.86 (0.76, 0.97) | 1.35E-02 | 7.18E-01 | 7.64E-02               |
| SM (d18:2/23:0, d18:1/23:1, d17:1/24:1)* | 0.88 (0.81, 0.97) | 7.18E-03 | 1.58E-01 | 0.96 (0.87, 1.05)    | 3.56E-01 | 9.08E-01 | 0.88 (0.77, 1.00) | 4.31E-02 | 9.10E-01 | 9.08E-01               |
| PE (O-18:0/18:1)                         | 0.90 (0.82, 0.99) | 3.37E-02 | 2.73E-01 | 0.94 (0.86, 1.03)    | 2.05E-01 | 8.62E-01 | 0.89 (0.79, 1.00) | 4.53E-02 | 9.10E-01 | 9.93E-01               |
| Andro steroid monosulfate C19H28O6S (1)* | 1.07 (0.97, 1.17) | 1.62E-01 | 4.71E-01 | 1.08 (0.98, 1.20)    | 1.21E-01 | 8.15E-01 | 1.17 (1.03, 1.34) | 1.76E-02 | 7.26E-01 | 3.85E-01               |
| 12,13-DiHOME                             | 0.87 (0.79, 0.96) | 5.44E-03 | 1.35E-01 | 0.91 (0.82, 1.01)    | 8.17E-02 | 8.15E-01 | 0.93 (0.82, 1.06) | 2.59E-01 | 9.18E-01 | 3.06E-01               |
| 21-Hydroxypregnenolone disulfate         | 1.07 (0.96, 1.19) | 2.08E-01 | 5.18E-01 | 1.03 (0.93, 1.14)    | 5.86E-01 | 9.57E-01 | 1.24 (1.08, 1.41) | 1.45E-03 | 6.21E-01 | 1.56E-01               |
| LysoPC (18:1)                            | 0.86 (0.78, 0.94) | 8.87E-04 | 7.80E-02 | 0.94 (0.86, 1.03)    | 1.89E-01 | 8.48E-01 | 0.94 (0.82, 1.06) | 3.08E-01 | 9.18E-01 | 1.74E-01               |
| SM (d18:1/22:1, d18:2/22:0, d16:1/24:1)* | 0.87 (0.80, 0.95) | 1.38E-03 | 7.80E-02 | 0.94 (0.86, 1.03)    | 2.13E-01 | 8.62E-01 | 0.91 (0.81, 1.04) | 1.63E-01 | 9.11E-01 | 4.75E-01               |
| 3-Ethylcatechol sulfate (2)              | 1.08 (0.99, 1.17) | 8.17E-02 | 3.51E-01 | 1.06 (0.97, 1.16)    | 2.24E-01 | 8.72E-01 | 1.15 (1.02, 1.31) | 2.39E-02 | 7.84E-01 | 8.42E-01               |
| 3-Hydroxypyridine glucuronide            | 1.07 (0.98, 1.17) | 1.19E-01 | 4.06E-01 | 1.08 (0.99, 1.18)    | 9.64E-02 | 8.15E-01 | 1.15 (1.01, 1.31) | 2.85E-02 | 8.51E-01 | 7.94E-01               |
| Arachidyl carnitine (C20)*               | 0.91 (0.83, 1.01) | 6.41E-02 | 3.18E-01 | 0.96 (0.87, 1.06)    | 4.47E-01 | 9.48E-01 | 0.92 (0.81, 1.04) | 1.74E-01 | 9.11E-01 | 9.67E-01               |
| S-Methylcysteine sulfoxide               | 0.93 (0.84, 1.02) | 1.21E-01 | 4.09E-01 | 0.89 (0.80, 0.99)    | 3.40E-02 | 8.15E-01 | 0.91 (0.79, 1.03) | 1.44E-01 | 9.11E-01 | 6.33E-01               |
| PC (18:0/18:2)*                          | 0.87 (0.81, 0.95) | 9.62E-04 | 7.80E-02 | 0.95 (0.87, 1.03)    | 2.28E-01 | 8.72E-01 | 0.94 (0.83, 1.06) | 3.29E-01 | 9.18E-01 | 2.87E-01               |
| (2,4 or 2,5)-Dimethylphenol sulfate      | 1.03 (0.94, 1.13) | 5.59E-01 | 7.57E-01 | 1.03 (0.94, 1.14)    | 5.19E-01 | 9.57E-01 | 1.15 (1.02, 1.30) | 2.16E-02 | 7.84E-01 | 4.67E-01               |
| N-Formylanthranilic acid                 | 0.94 (0.85, 1.04) | 2.34E-01 | 5.44E-01 | 0.87 (0.79, 0.97)    | 8.95E-03 | 8.15E-01 | 0.92 (0.82, 1.04) | 1.76E-01 | 9.11E-01 | 8.74E-01               |
| Octadecadienedioate (C18:2-DC)*          | 1.01 (0.92, 1.11) | 7.70E-01 | 8.90E-01 | 0.93 (0.83, 1.03)    | 1.75E-01 | 8.38E-01 | 0.83 (0.73, 0.94) | 4.49E-03 | 7.18E-01 | <b>3.99E-02</b>        |
| Syringol sulfate                         | 1.05 (0.96, 1.15) | 2.78E-01 | 5.70E-01 | 1.00 (0.90, 1.10)    | 9.46E-01 | 9.94E-01 | 1.15 (1.02, 1.31) | 2.28E-02 | 7.84E-01 | 3.80E-01               |
| Docosadiolate (C22-DC)                   | 0.97 (0.88, 1.07) | 4.97E-01 | 7.24E-01 | 0.90 (0.82, 0.99)    | 3.35E-02 | 8.15E-01 | 0.88 (0.76, 1.00) | 5.45E-02 | 9.10E-01 | 3.29E-01               |
| PC (18:2/20:4n6)*                        | 0.87 (0.80, 0.95) | 1.63E-03 | 7.80E-02 | 0.98 (0.90, 1.08)    | 7.19E-01 | 9.72E-01 | 0.89 (0.78, 1.01) | 6.12E-02 | 9.10E-01 | 5.35E-01               |
| PE (O-16:0/18:1)*                        | 0.90 (0.82, 0.99) | 2.84E-02 | 2.48E-01 | 0.96 (0.87, 1.05)    | 3.38E-01 | 9.08E-01 | 0.90 (0.80, 1.01) | 7.39E-02 | 9.10E-01 | 7.83E-01               |
| PI (18:0/18:1)*                          | 0.90 (0.81, 0.99) | 2.48E-02 | 2.40E-01 | 0.94 (0.85, 1.04)    | 2.05E-01 | 8.62E-01 | 0.91 (0.81, 1.03) | 1.51E-01 | 9.11E-01 | 8.22E-01               |
| LysoPC (24:0)                            | 0.87 (0.79, 0.95) | 2.87E-03 | 9.97E-02 | 0.91 (0.82, 1.01)    | 7.13E-02 | 8.15E-01 | 0.95 (0.84, 1.08) | 4.15E-01 | 9.18E-01 | 1.06E-01               |
| Hippurate                                | 0.95 (0.86, 1.04) | 2.80E-01 | 5.70E-01 | 0.87 (0.79, 0.97)    | 1.02E-02 | 8.15E-01 | 0.92 (0.80, 1.05) | 2.05E-01 | 9.18E-01 | 7.65E-01               |
| SM (d18:2/14:0, d18:1/14:1)*             | 0.86 (0.79, 0.95) | 1.77E-03 | 7.80E-02 | 0.99 (0.90, 1.09)    | 8.40E-01 | 9.86E-01 | 0.88 (0.77, 1.00) | 4.94E-02 | 9.10E-01 | 5.37E-01               |
| Androstenediol (3β,17β) disulfate (1)    | 1.04 (0.94, 1.15) | 4.12E-01 | 6.69E-01 | 1.07 (0.97, 1.17)    | 1.71E-01 | 8.38E-01 | 1.11 (0.98, 1.24) | 9.61E-02 | 9.10E-01 | 7.80E-01               |
| PE (18:2/18:2)*                          | 0.91 (0.82, 1.00) | 6.04E-02 | 3.14E-01 | 0.92 (0.83, 1.01)    | 9.01E-02 | 8.15E-01 | 0.92 (0.81, 1.04) | 1.64E-01 | 9.11E-01 | 9.07E-01               |
| Sphinganine-1-phosphate                  | 0.87 (0.79, 0.95) | 1.89E-03 | 7.80E-02 | 0.93 (0.85, 1.02)    | 1.25E-01 | 8.15E-01 | 0.95 (0.85, 1.06) | 3.56E-01 | 9.18E-01 | <b>3.85E-02</b>        |
| PI (18:0/18:2)                           | 0.92 (0.84, 1.02) | 1.05E-01 | 3.88E-01 | 0.92 (0.83, 1.02)    | 9.56E-02 | 8.15E-01 | 0.92 (0.81, 1.04) | 1.78E-01 | 9.11E-01 | 8.60E-01               |
| PE (O-16:0/18:2)*                        | 0.92 (0.84, 1.01) | 8.88E-02 | 3.64E-01 | 0.93 (0.85, 1.02)    | 1.14E-01 | 8.15E-01 | 0.92 (0.81, 1.04) | 1.90E-01 | 9.13E-01 | 9.60E-01               |
| Glycerophosphoethanolamine               | 0.92 (0.84, 1.01) | 7.34E-02 | 3.41E-01 | 0.95 (0.87, 1.03)    | 2.24E-01 | 8.72E-01 | 0.90 (0.80, 1.02) | 9.89E-02 | 9.10E-01 | 8.08E-01               |
| 16α-Hydroxy DHEA 3-sulfate               | 1.06 (0.96, 1.17) | 2.52E-01 | 5.51E-01 | 1.11 (1.00, 1.22)    | 5.41E-02 | 8.15E-01 | 1.13 (0.99, 1.29) | 6.74E-02 | 9.10E-01 | 5.43E-01               |
| SM (d18:1/24:0)                          | 0.86 (0.79, 0.93) | 4.79E-04 | 7.80E-02 | 0.93 (0.85, 1.03)    | 1.64E-01 | 8.36E-01 | 0.97 (0.86, 1.09) | 6.17E-01 | 9.64E-01 | 7.91E-02               |
| Undecadienoate (C11-DC)                  | 0.94 (0.85, 1.04) | 2.06E-01 | 5.18E-01 | 0.92 (0.83, 1.01)    | 8.20E-02 | 8.15E-01 | 0.90 (0.80, 1.01) | 6.92E-02 | 9.10E-01 | 7.97E-01               |
| Asparagine                               | 0.93 (0.84, 1.02) | 1.10E-01 | 3.91E-01 | 0.94 (0.85, 1.03)    | 1.97E-01 | 8.57E-01 | 0.91 (0.80, 1.03) | 1.19E-01 | 9.11E-01 | 8.29E-01               |
| Androstenediol (3α,17α) monosulfate (2)  | 1.00 (0.91, 1.10) | 9.81E-01 | 9.90E-01 | 1.08 (0.97, 1.19)    | 1.69E-01 | 8.38E-01 | 1.21 (1.07, 1.37) | 3.12E-03 | 6.77E-01 | 1.54E-02               |
| Catechol glucuronide                     | 1.06 (0.97, 1.15) | 2.24E-01 | 5.32E-01 | 1.12 (1.03, 1.23)    | 1.20E-02 | 8.15E-01 | 1.12 (0.98, 1.27) | 9.27E-02 | 9.10E-01 | 9.21E-01               |
| Pregnenolone sulfate                     | 1.07 (0.97, 1.19) | 1.83E-01 | 5.01E-01 | 1.02 (0.91, 1.13)    | 7.76E-01 | 9.79E-01 | 1.19 (1.05, 1.36) | 8.05E-03 | 7.18E-01 | 4.88E-01               |
| 4-Guanidinobutanoate                     | 0.90 (0.82, 0.99) | 3.08E-02 | 2.62E-01 | 0.92 (0.83, 1.02)    | 1.18E-01 | 8.15E-01 | 0.97 (0.87, 1.08) | 5.85E-01 | 9.64E-01 | 1.80E-01               |
| LysoPE (O-18:0)*                         | 0.90 (0.82, 1.00) | 4.51E-02 | 2.85E-01 | 0.93 (0.85, 1.02)    | 1.49E-01 | 8.20E-01 | 0.93 (0.82, 1.06) | 2.70E-01 | 9.18E-01 | 5.18E-01               |
| LysoPE (18:0)                            | 0.88 (0.80, 0.97) | 8.12E-03 | 1.63E-01 | 1.00 (0.91, 1.10)    | 9.97E-01 | 9.98E-01 | 0.89 (0.79, 1.01) | 7.70E-02 | 9.10E-01 | 8.59E-01               |
| Androstenediol (3β,17β) monosulfate (1)  | 1.02 (0.93, 1.13) | 6.62E-01 | 8.31E-01 | 1.09 (0.99, 1.21)    | 8.25E-02 | 8.15E-01 | 1.12 (0.99, 1.27) | 7.74E-02 | 9.10E-01 | 5.04E-01               |
| Sphinganine                              | 0.88 (0.80, 0.96) | 5.43E-03 | 1.35E-01 | 0.91 (0.83, 1.01)    | 6.87E-02 | 8.15E-01 | 0.97 (0.87, 1.09) | 6.45E-01 | 9.64E-01 | 8.52E-02               |
| β-Cryptoxanthin                          | 0.95 (0.87, 1.05) | 3.21E-01 | 6.05E-01 | 0.90 (0.82, 0.99)    | 3.76E-02 | 8.15E-01 | 0.93 (0.82, 1.05) | 2.49E-01 | 9.18E-01 | 4.82E-01               |
| PE (18:1/18:2)*                          | 0.91 (0.82, 1.00) | 5.25E-02 | 3.03E-01 | 0.95 (0.86, 1.06)    | 3.66E-01 | 9.16E-01 | 0.92 (0.82, 1.04) | 2.10E-01 | 9.18E-01 | 9.45E-01               |
| Dehydroepiandrosterone sulfate (DHEA-S)  | 1.02 (0.92, 1.13) | 7.48E-01 | 8.72E-01 | 1.07 (0.96, 1.19)    | 2.14E-01 | 8.62E-01 | 1.18 (1.03, 1.35) | 1.50E-02 | 7.18E-01 | 1.03E-01               |
| Glutamine                                | 0.91 (0.83, 0.99) | 3.64E-02 | 2.75E-01 | 0.94 (0.86, 1.04)    | 2.27E-01 | 8.72E-01 | 0.93 (0.82, 1.05) | 2.37E-01 | 9.18E-01 | 5.97E-01               |

†Models were adjusted for age, race, education, family history of breast cancer, age at menarche, oral contraceptive use, postmenopausal hormone use, parity and age at first birth.

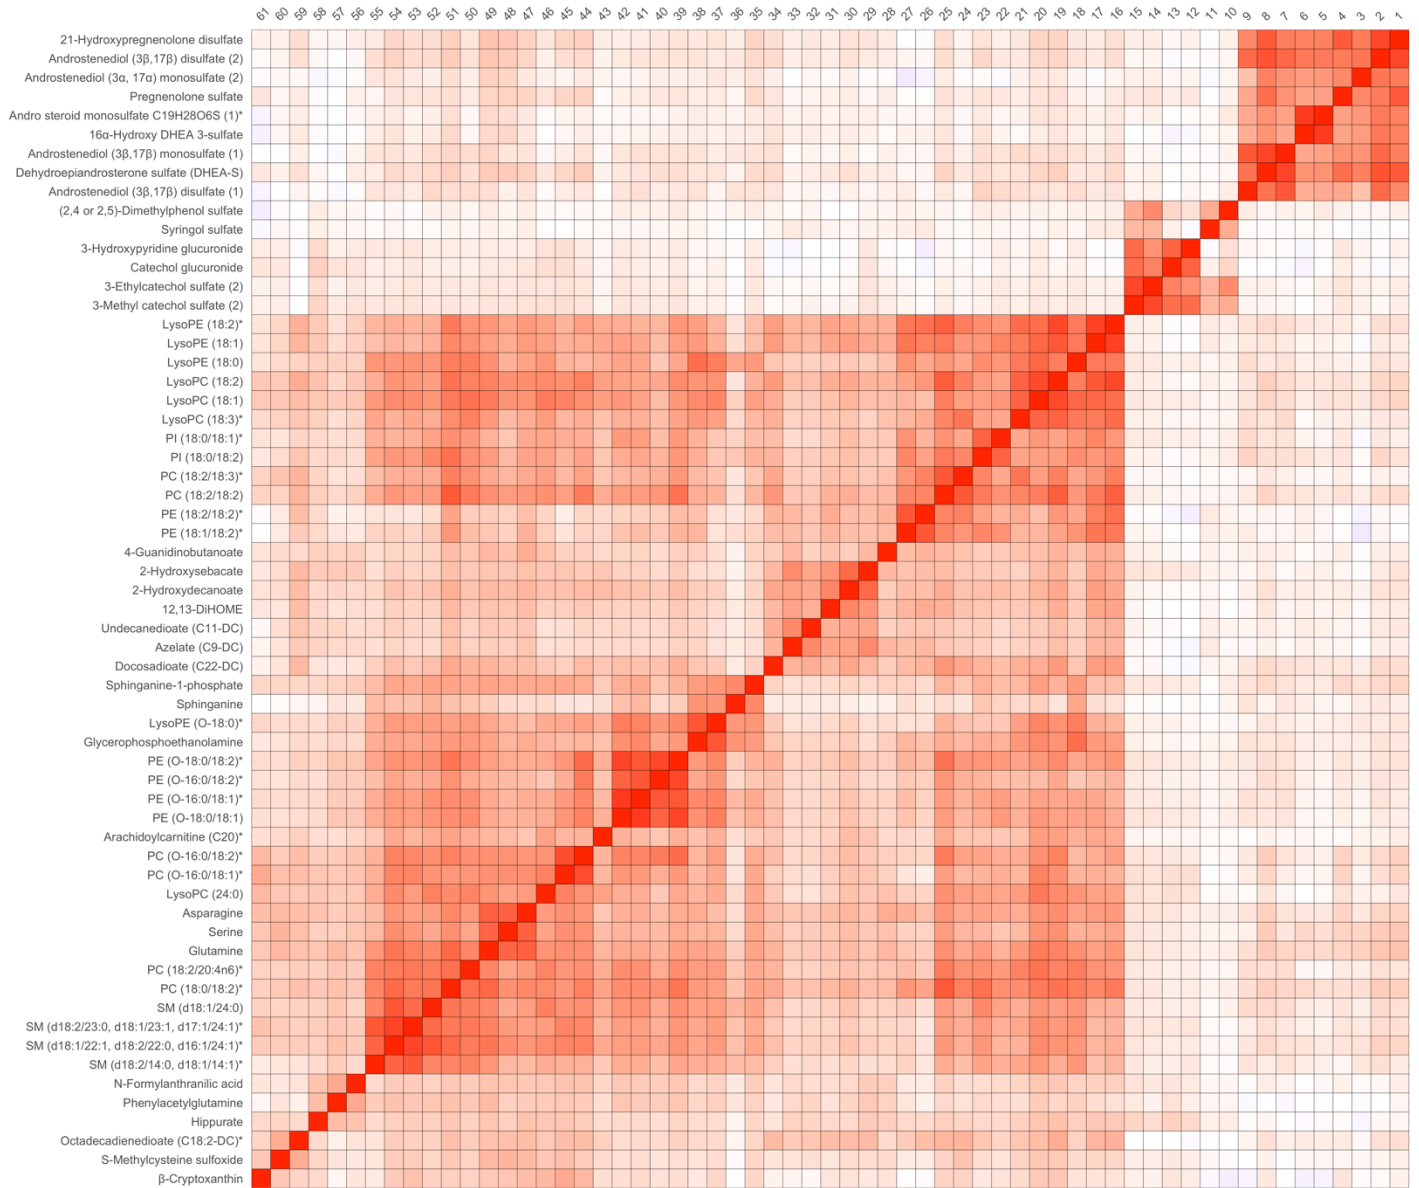

**Supplemental Figure 1.** Hierarchical heat map based on Pearson correlation coefficients of metabolites associated with breast cancer at FDR<0.20 in analyses adjusted for age, race, education, family history of breast cancer, age at menarche, OC use, and parity.
